# Supplementary material for: Dual biomarkers long non-coding RNA GAS5 and microRNA-34a co-expression signature in common solid tumors
Source: PubMed Central journal article supplement (PMC6173395; doi:10.1371/journal.pone.0198231), 2018-10-05
Supplement: pone.0198231.s001.pdf [file pone.0198231.s001.pdf]

**S1 Table. GAS5 alternative splicing transcripts.**

| Name     | Transcript ID     | Length (bp) | Protein    | Biotype         | RefSeq    |
|----------|-------------------|-------------|------------|-----------------|-----------|
| GAS5-210 | ENST00000431268.5 | 1698        | No protein | Retained intron |           |
| GAS5-215 | ENST00000442067.5 | 1114        | No protein | Retained intron |           |
| GAS5-204 | ENST00000421068.5 | 1060        | No protein | Retained intron |           |
| GAS5-201 | ENST00000412059.5 | 979         | No protein | Retained intron |           |
| GAS5-216 | ENST00000443799.5 | 897         | No protein | Retained intron |           |
| GAS5-214 | ENST00000436656.5 | 822         | No protein | Retained intron |           |
| GAS5-203 | ENST00000416952.5 | 799         | No protein | Retained intron |           |
| GAS5-213 | ENST00000436285.5 | 772         | No protein | Retained intron |           |
| GAS5-206 | ENST00000422183.5 | 745         | No protein | Retained intron |           |
| GAS5-228 | ENST00000456812.6 | 723         | No protein | Retained intron |           |
| GAS5-220 | ENST00000449589.5 | 712         | No protein | Retained intron |           |
| GAS5-207 | ENST00000422207.5 | 643         | No protein | Retained intron |           |
| GAS5-226 | ENST00000455838.5 | 632         | No protein | Retained intron |           |
| GAS5-225 | ENST00000454813.1 | 621         | No protein | Retained intron |           |
| GAS5-227 | ENST00000456293.5 | 583         | No protein | Retained intron |           |
| GAS5-212 | ENST00000434796.5 | 575         | No protein | Retained intron |           |
| GAS5-205 | ENST00000422008.5 | 497         | No protein | Retained intron |           |
| GAS5-229 | ENST00000458220.1 | 469         | No protein | Retained intron |           |
| GAS5-217 | ENST00000444470.5 | 424         | No protein | Retained intron |           |
| GAS5-222 | ENST00000451607.5 | 1007        | No protein | lincRNA         |           |
| GAS5-211 | ENST00000432536.5 | 959         | No protein | lincRNA         |           |
| GAS5-209 | ENST00000430245.5 | 723         | No protein | lincRNA         |           |
| GAS5-224 | ENST00000454068.5 | 688         | No protein | lincRNA         |           |
| GAS5-221 | ENST00000450589.5 | 632         | No protein | lincRNA         | NR_002578 |
| GAS5-218 | ENST00000448718.5 | 565         | No protein | lincRNA         |           |
| GAS5-219 | ENST00000449289.5 | 542         | No protein | lincRNA         |           |
| GAS5-223 | ENST00000452197.5 | 483         | No protein | lincRNA         |           |
| GAS5-202 | ENST00000414075.5 | 413         | No protein | lincRNA         |           |
| GAS5-208 | ENST00000425771.5 | 242         | No protein | lincRNA         |           |

<http://www.rnacentral.org/rna/URS00009C227F/9606>
