# Supplementary material for: Dual biomarkers long non-coding RNA GAS5 and microRNA-34a co-expression signature in common solid tumors
Source: PubMed Central journal article supplement (PMC6173395; doi:10.1371/journal.pone.0198231), 2018-10-05
Supplement: pone.0198231.s002.pdf [file pone.0198231.s002.pdf]

**S2 Table. GAS5 common variants.**

| Variant ID  | Chr: bp                 | Alleles | Global MA | Minor allele | Global MA |
|-------------|-------------------------|---------|-----------|--------------|-----------|
| rs74609518  | 1:173865156             | C/T     | 0.065     | T            | SNP       |
| rs9442660   | 1:173865218             | A/G     | 0.112     | G            | SNP       |
| rs2235095   | 1:173865467             | G/A     | 0.12      | A            | SNP       |
| rs6790      | 1:173865494             | G/A     | 0.12      | A            | SNP       |
| rs14262     | 1:173865545             | G/A     | 0.065     | A            | SNP       |
| rs2067079   | 1:173866073             | C/T     | 0.193     | T            | SNP       |
| rs9425427   | 1:173866363             | T/C     | 0.094     | C            | SNP       |
| rs1322772   | 1:173866620             | C/A     | 0.112     | A            | SNP       |
| rs13476     | 1:173866781             | T/A     | 0.094     | A            | SNP       |
| rs17359906  | 1:173867056             | G/A     | 0.062     | A            | SNP       |
| rs144869587 | 1:173867109 - 173867110 | -/A     | 0.192     | A            | insertion |
| rs9660881   | 1:173867378             | T/C     | 0.207     | C            | SNP       |
| rs1951625   | 1:173867464             | G/A     | 0.336     | A            | SNP       |
| rs75315904  | 1:173867913             | G/A     | 0.12      | A            | SNP       |
| rs55829688  | 1:173868168             | T/C     | 0.207     | C            | SNP       |
| rs145204276 | 1:173868254 -173868258  | AGGCA/- | 0.12      | -            | deletion  |

| Conseq. Type                       | Transcript        |
|------------------------------------|-------------------|
| intron variant                     | ENST00000412059.5 |
| intron variant                     | ENST00000412059.5 |
| intron variant                     | ENST00000456812.6 |
| non coding transcript exon variant | ENST00000412059.5 |
| splice region variant              | ENST00000456812.6 |
| intron variant                     | ENST00000412059.5 |
| non coding transcript exon variant | ENST00000458220.1 |
| intron variant                     | ENST00000412059.5 |
| non coding transcript exon variant | ENST00000458220.1 |
| intron variant                     | ENST00000412059.5 |
| intron variant                     | ENST00000412059.5 |
| intron variant                     | ENST00000458220.1 |
| intron variant                     | ENST00000412059.5 |
| intron variant                     | ENST00000458220.1 |
| intron variant                     | ENST00000430245.5 |
| intron variant                     | ENST00000430245.5 |
