# Supplementary material for: Dual biomarkers long non-coding RNA GAS5 and microRNA-34a co-expression signature in common solid tumors
Source: PubMed Central journal article supplement (PMC6173395; doi:10.1371/journal.pone.0198231), 2018-10-05
Supplement: pone.0198231.s003.pdf [file pone.0198231.s003.pdf]

**S3 Table. LncRNA GAS5-microRNA interaction.**

| most pred | miRNA             | Folding en | GAS5 target site sequence  |
|-----------|-------------------|------------|----------------------------|
| 166       | hsa_miR_3150a_3   | 12.1       | TAAACTTTGAAGGAAATTTTAA     |
| 11        | hsa_miR_103a_2_5p | 12.4       | TTGGGTAAGGACATGAAGACAGTT   |
| 49        | hsa_miR_128_1_5   | 12.4       | GTAAGGACATGAAGACAGTTCCT    |
| 67        | hsa_miR_138_2_3   | 12.4       | AAAGCTGGAAGTTGAAATGGT      |
| 67        | hsa_miR_128_1_5   | 12.4       | TTTGAAGCTTACTACAGCCTCA     |
| 433       | hsa_miR_548au_3   | 13         | ATGATGTAATGATTCTGCCA       |
| 40        | hsa_miR_125b_1_   | 13.4       | AGGTATGGAGAGTCGGCTTGA      |
| 205       | hsa_miR_3622a_5   | 14.6       | CAAGCATGCAGCTTACTGCTTG     |
| 556       | hsa_miR_6780a_3   | 14.2       | CTGGAAGTTGAAATGGTGGAG      |
| 301       | hsa_miR_3689a_3   | 14.3       | ACCAATGATGTAATGATTCTGCCAA  |
| 86        | hsa_miR_1827      | -12.9      | AAAGGGTCTTGCCTCA           |
| 305       | hsa_miR_450a_2_   | 14.6       | AGATTA AACAGTGTCTCCAAT     |
| 679       | hsa_miR_92a_2_5   | 14.8       | TGGGCTCAAGTGATCCTCAGCC     |
| 266       | hsa_miR_4316      | -16.9      | AAAGGGTCTTGCCTCACC         |
| 558       | hsa_miR_6780b_5   | 15.2       | ACTTCTGGGCTCAAGTGATCCTCA   |
| 121       | hsa_miR_218_2_3   | 15.4       | AGTCGGCTTGACTACACTGTG      |
| 46        | hsa_miR_1273g_5   | 17.6       | GCTCAAGTGATCCTCAGCCTCC     |
| 207       | hsa_miR_3622b_5   | 18.3       | TCAAGTGATCCTCAGCCT         |
| 557       | hsa_miR_6780a_5   | 19.9       | GCTCAAGTGATCCTCAGCCTCCCAG  |
| 225       | hsa_miR_3689a_3   | 20         | GCTCAAGTGATCCTCAGCCTCCCAG  |
| 501       | hsa_miR_6511a_5   | 20.5       | AGAGTCGGCTTGACTACACTGTGTG  |
| 226       | hsa_miR_3689b_3   | 20.8       | GCTCAAGTGATCCTCAGCCTCCCAG  |
| 47        | hsa_miR_1273h_5   | 21.3       | AGTGATCCTCAGCCTCCCAG       |
| 279       | hsa_miR_4443      | -14.1      | AAAACAGTGTCTCCAA           |
| 377       | hsa_miR_4472      | -13.8      | AAAACAGTGTCTCCAATT         |
| 496       | hsa_miR_6505_5p   | -12.6      | AAAACAGTGTCTCCAATTTAA      |
| 664       | hsa_miR_8077      | -16        | AAAGAGCAAGCCTAACTCAAGCC    |
| 497       | hsa_miR_6506_3p   | -12        | AAAGCTGGAAGTTGAAATGG       |
| 416       | hsa_miR_5187_5p   | -13.3      | AAAGGGTCTTGCCTCACCCA       |
| 124       | hsa_miR_224_3p    | -12.2      | AAATTTTAAATGGGTATTATTTT    |
| 354       | hsa_miR_4715_5p   | -14.3      | AAGCAAGCATGCAGCTTACTG      |
| 100       | hsa_miR_194_3p    | -16.1      | AAGCAAGCATGCAGCTTACTGC     |
| 94        | hsa_miR_1909_3p   | -16.3      | AAGCAAGCATGCAGCTTACTGCT    |
| 434       | hsa_miR_548ax     | -12.8      | AAGCAAGCATGCAGCTTACTGCT    |
| 36        | hsa_miR_1244      | -16.3      | AAGCAAGCATGCAGCTTACTGCTT   |
| 244       | hsa_miR_3944_3p   | -15.3      | AAAGGTATGGAGAGTCGGCTTGAC   |
| 105       | hsa_miR_197_5p    | -13.3      | AAGCAAGCATGCAGCTTACTGCTTG  |
| 633       | hsa_miR_7112_5p   | -14.3      | AAGCAAGCATGCAGCTTACTGCTTGA |
| 97        | hsa_miR_1910_3p   | -13.8      | AAGCATGCAGCTTACTGCTTG      |
| 276       | hsa_miR_4436a     | -12.1      | AACCAATGATGTAATGATTCTGC    |
| 311       | hsa_miR_4525      | -14.2      | AACCAATGATGTAATGATTCTGCC   |
| 93        | hsa_miR_1908_5p   | -13.9      | AACCAATGATGTAATGATTCTGCCA  |
| 41        | hsa_miR_126_3p    | -12.4      | AACGTTTTTATCCATGGATGA      |

|     |                 |        |                           |
|-----|-----------------|--------|---------------------------|
| 608 | hsa_miR_6862_5p | -12.4  | AACGTTTTTATCCATGGATGACTTG |
| 95  | hsa_miR_1909_5p | -14.7  | AACTCAAGCCATTGGCACACA     |
| 589 | hsa_miR_6825_5p | -12    | AAGAAGATTAACAGTGTCTCCA    |
| 202 | hsa_miR_3122    | -12.94 | AAGATTAACAGTGTCTCCAAT     |
| 454 | hsa_miR_585_3p  | -17.3  | AAGCATGCAGCTTACTGCTTG     |
| 263 | hsa_miR_1244    | -14.6  | ACAACAAGCAAGCATGCAGCTT    |
| 395 | hsa_miR_497_5p  | -12.4  | ACAAGCAAGCATGCAGCTT       |
| 513 | hsa_miR_6726_5p | -15.5  | ACAAGCAAGCATGCAGCTTACTG   |
| 406 | hsa_miR_5047    | -16.5  | ACCACAACAAGCAAGCATGCAG    |
| 518 | hsa_miR_6736_5p | -16.2  | ACCACAACAAGCAAGCATGCAG    |
| 50  | hsa_miR_1286    | -16.7  | ACTGCTTGAAAGGGTCTTGCC     |
| 611 | hsa_miR_6869_5p | -15.1  | ACTGCTTGAAAGGGTCTTGCTCAC  |
| 176 | hsa_miR_3174    | -12.6  | AGCAAGCATGCAGCTTACTG      |
| 131 | hsa_miR_2467_3p | -13.2  | AGCAAGCATGCAGCTTACTGCT    |
| 670 | hsa_miR_885_3p  | -15.6  | AGCAAGCATGCAGCTTACTGCTT   |
| 577 | hsa_miR_6811_3p | -14.6  | AAGCCATTGGCACACAGGCA      |
| 535 | hsa_miR_5007_5p | -14.5  | AAGCCATTGGCACACAGGCATTA   |
| 915 | hsa_miR_8069    | -13.9  | AAGCCATTGGCACACAGGCATTA   |
| 662 | hsa_miR_8071    | -16.5  | AAGCCTAACTCAAGCCATTG      |
| 420 | hsa_miR_5190    | -14.8  | AAGCCTAACTCAAGCCATTGG     |
| 160 | hsa_miR_3127_5p | -14.1  | AAGCCTAACTCAAGCCATTGGC    |
| 648 | hsa_miR_616_3p  | -13.1  | AAGCCTAACTCAAGCCATTGGCA   |
| 415 | hsa_miR_4537    | -15.4  | AAGCCTAACTCAAGCCATTGGCACA |
| 108 | hsa_miR_199a_5p | -12.4  | AAGCTGGAAGTTGAAATGGTGGGA  |
| 565 | hsa_miR_6788_3p | -14.2  | AAGCTGGAAGTTGAAATGGTGGGA  |
| 208 | hsa_miR_3130_3p | -14.5  | AAGCTGGAAGTTGAAATGGTGGAGT |
| 140 | hsa_miR_2861    | -16.5  | AAGCTTACTACAGCCTC         |
| 260 | hsa_miR_4283    | -14.8  | AAGCTTACTACAGCCTCA        |
| 299 | hsa_miR_4500    | -14.7  | AAGCTTACTACAGCCTCA        |
| 241 | hsa_miR_3936    | -12.2  | AGCAAGCATGCAGCTTACTGCTTG  |
| 376 | hsa_miR_4756_5p | -13.4  | AGCAAGCATGCAGCTTACTGCTTG  |
| 512 | hsa_miR_6721_5p | -12.8  | AGCAAGCATGCAGCTTACTGCTTG  |
| 405 | hsa_miR_504_5p  | -15.1  | AGCTTACTGCTTGAAAGGGTCT    |
| 651 | hsa_miR_769_5p  | -17.3  | AGCTTACTGCTTGAAAGGGTCTTG  |
| 255 | hsa_miR_4260    | -16.1  | AGGGTCTTGCTCACCCAAG       |
| 218 | hsa_miR_3151_5p | -18.9  | AAGTGATCCTCAGCCTCCC       |
| 449 | hsa_miR_5698    | -14.4  | AAGTGATCCTCAGCCTCCCA      |
| 156 | hsa_miR_3122    | -13.7  | AAGTGATCCTCAGCCTCCCAGT    |
| 543 | hsa_miR_6761_5p | -12.3  | AAGTGATCCTCAGCCTCCCAGT    |
| 836 | hsa_miR_6861_5p | -21.1  | AAGTGATCCTCAGCCTCCCAGT    |
| 159 | hsa_miR_2467_5p | -14.5  | AAGTTGAAATGGTGGAGTCCA     |
| 249 | hsa_miR_423_3p  | -15.8  | AGGGTCTTGCTCACCCAAGCT     |
| 363 | hsa_miR_4730    | -13.9  | AATGATGTAATGATTCTGCCAA    |
| 315 | hsa_miR_4538    | -21    | AGGGTCTTGCTCACCCAAGCTA    |
| 596 | hsa_miR_6839_5p | -15.3  | AGGGTCTTGCTCACCCAAGCTAGA  |
| 88  | hsa_miR_185_5p  | -12.5  | ATGGGTATTATTTTCATCTTCA    |
| 534 | hsa_miR_6751_5p | -15    | ATGGGTATTATTTTCATCTTCAA   |

|     |                 |        |                             |
|-----|-----------------|--------|-----------------------------|
| 472 | hsa_miR_6125    | -12.7  | CAAGCATGCAGCTTACTGC         |
| 542 | hsa_miR_6760_5p | -13.1  | CAAGCATGCAGCTTACTGCTTG      |
| 500 | hsa_miR_6509_5p | -12.1  | CAAGCATGCAGCTTACTGCTTGAA    |
| 190 | hsa_miR_339_5p  | -14.3  | CATGCAGCTTACTGCTTGAAAGGGT   |
| 172 | hsa_miR_3157_5p | -14.2  | ACACAGGCATTAGACAGAAAGCTGGA  |
| 13  | hsa_miR_103b    | -13.7  | ACAGGCATTAGACAGAAAGCTGGA    |
| 502 | hsa_miR_6512_3p | -16.5  | ACAGGCATTAGACAGAAAGCTGGA    |
| 511 | hsa_miR_6720_5p | -16.7  | ACAGGCATTAGACAGAAAGCTGGA    |
| 504 | hsa_miR_658     | -19.5  | ACCAATGATGTAATGATTCTGCC     |
| 296 | hsa_miR_449a    | -15.1  | ACCAATGATGTAATGATTCTGCCA    |
| 517 | hsa_miR_6731_5p | -12.1  | ACCAATGATGTAATGATTCTGCCA    |
| 78  | hsa_miR_152_3p  | -12.8  | CCAAGCTAGAGTGCAGTGG         |
| 456 | hsa_miR_593_3p  | -15.3  | CCTCACCCAAGCTAGAGTGCA       |
| 605 | hsa_miR_6860    | -21.1  | CCTCACCCAAGCTAGAGTGCAGT     |
| 333 | hsa_miR_4660    | -15.74 | CTCACCCAAGCTAGAGTGCA        |
| 641 | hsa_miR_7158_3p | -13.2  | CTCACCCAAGCTAGAGTGCAG       |
| 475 | hsa_miR_616_3p  | -15.4  | ACGTTTTTATCCATGGATGACT      |
| 455 | hsa_miR_592     | -13    | ACTCAAGCCATTGGCACAC         |
| 268 | hsa_miR_4322    | -14.6  | ACTCAAGCCATTGGCACACAG       |
| 38  | hsa_miR_1251_3p | -12.7  | CTCACCCAAGCTAGAGTGCAGTG     |
| 576 | hsa_miR_6808_3p | -13.8  | CTGCTTGAAAGGGTCTTGC         |
| 288 | hsa_miR_4479    | -16.8  | CTGCTTGAAAGGGTCTTGCC        |
| 593 | hsa_miR_6836_5p | -25.1  | CTGCTTGAAAGGGTCTTGCC        |
| 31  | hsa_miR_1207_5p | -13    | CTGCTTGAAAGGGTCTTGCCT       |
| 239 | hsa_miR_3927_3p | -12.4  | CTGCTTGAAAGGGTCTTGCCTC      |
| 615 | hsa_miR_6881_5p | -14.52 | CTGCTTGAAAGGGTCTTGCCTCA     |
| 494 | hsa_miR_6504_3p | -12.1  | AGAAAGCTGGAAGTTGAAATG       |
| 355 | hsa_miR_4716_5p | -14    | AGAAAGCTGGAAGTTGAAATGGTGGA  |
| 22  | hsa_miR_1184    | -12.7  | AGAATTCATGATTGAAGAAATGCAGG  |
| 284 | hsa_miR_3650    | -12.3  | AGAGTCGGCTTGACTACACTG       |
| 446 | hsa_miR_5683    | -12.8  | AGAGTCGGCTTGACTACACTGTG     |
| 222 | hsa_miR_3681_3p | -15.9  | AGAGTCGGCTTGACTACACTGTGT    |
| 484 | hsa_miR_639     | -12.9  | AGAGTCGGCTTGACTACACTGTGTGGA |
| 237 | hsa_miR_3918    | -17    | AGATGCAGTGTGGCTCTGG         |
| 141 | hsa_miR_2909    | -12.8  | AGATGCAGTGTGGCTCTGGA        |
| 429 | hsa_miR_525_5p  | -16.7  | AGATGCAGTGTGGCTCTGGAT       |
| 278 | hsa_miR_4440    | -12.5  | AGATGCAGTGTGGCTCTGGATA      |
| 655 | hsa_miR_7852_3p | -14.9  | AGATGCAGTGTGGCTCTGGATA      |
| 32  | hsa_miR_1225_5p | -19.5  | CTGCTTGAAAGGGTCTTGCCTCAC    |
| 604 | hsa_miR_6858_5p | -16.1  | CTGCTTGAAAGGGTCTTGCCTCAC    |
| 629 | hsa_miR_711     | -16.1  | CTTACTGCTTGAAAGGGTCTT       |
| 44  | hsa_miR_1265    | -13.9  | CTTACTGCTTGAAAGGGTCTTGT     |
| 625 | hsa_miR_6895_5p | -16    | CTTACTGCTTGAAAGGGTCTTGT     |
| 471 | hsa_miR_611     | -14.8  | CTTACTGCTTGAAAGGGTCTTGC     |
| 271 | hsa_miR_4417    | -16.1  | CTTGAAAGGGTCTTGCCTCACC      |
| 524 | hsa_miR_6742_5p | -24.3  | CTTGAAAGGGTCTTGCCTCACC      |
| 328 | hsa_miR_4649_5p | -22.6  | CTTGAAAGGGTCTTGCCTCACCCA    |

|     |                 |        |                           |
|-----|-----------------|--------|---------------------------|
| 548 | hsa_miR_6766_5p | -25    | CTTGAAAGGGTCTTGCCTCACCCA  |
| 39  | hsa_miR_1251_5p | -19.4  | CTTGCCTCACCCAAGCTAGAGT    |
| 212 | hsa_miR_3655    | -12.3  | AGCCATTGGCACACAGGC        |
| 672 | hsa_miR_889_5p  | -14.7  | AGCCATTGGCACACAGGCATT     |
| 399 | hsa_miR_5006_5p | -18.9  | AGCCTAACTCAAGCCATTGGCAC   |
| 602 | hsa_miR_6850_5p | -15.1  | AGCCTAACTCAAGCCATTGGCAC   |
| 236 | hsa_miR_3911    | -15.6  | AGCCTAACTCAAGCCATTGGCACA  |
| 281 | hsa_miR_4449    | -15.8  | AGCCTAACTCAAGCCATTGGCACA  |
| 508 | hsa_miR_664b_5p | -15.9  | AGCCTAACTCAAGCCATTGGCACA  |
| 204 | hsa_miR_3620_5p | -22.4  | AGCCTAACTCAAGCCATTGGCACAC |
| 62  | hsa_miR_1307_5p | -15.7  | AGCTGGAAGTTGAAATGGTGGGA   |
| 739 | hsa_miR_6754_3p | -14.3  | AGCTGGAAGTTGAAATGGTGGAGT  |
| 438 | hsa_miR_5572    | -13.7  | AGCTTACTACAGCCTCAAAA      |
| 372 | hsa_miR_4748    | -14    | AGCTTACTACAGCCTCAAACCTC   |
| 183 | hsa_miR_3194_3p | -15.44 | CTTGCCTCACCCAAGCTAGAGTG   |
| 286 | hsa_miR_4472    | -12.5  | GAAAGGGTCTTGCCTCACCC      |
| 76  | hsa_miR_149_3p  | -13.4  | GAAAGGGTCTTGCCTCACCCA     |
| 478 | hsa_miR_626     | -17.2  | AGGACATGAAGACAGTT         |
| 579 | hsa_miR_6813_5p | -22.4  | AGGACATGAAGACAGTTCCTG     |
| 242 | hsa_miR_3937    | -12.2  | AGGACATGAAGACAGTTCCTGT    |
| 669 | hsa_miR_873_5p  | -15.2  | AGGACATGAAGACAGTTCCTGT    |
| 652 | hsa_miR_770_5p  | -14.7  | AGGCATTAGACAGAAAGCTGGA    |
| 71  | hsa_miR_145_5p  | -16.3  | AGGCATTAGACAGAAAGCTGGAA   |
| 72  | hsa_miR_1468_5p | -12.2  | AGGCATTAGACAGAAAGCTGGAA   |
| 20  | hsa_miR_1180_3p | -15.8  | AGGCATTAGACAGAAAGCTGGAAAG |
| 529 | hsa_miR_6745    | -16    | GAAAGGGTCTTGCCTCACCCA     |
| 96  | hsa_miR_190b    | -13    | GACCACAACAAGCAAGCATGCA    |
| 198 | hsa_miR_34c_5p  | -19    | GCAAGCATGCAGCTTACTGCTT    |
| 298 | hsa_miR_449b_5p | -18.3  | GCAAGCATGCAGCTTACTGCTT    |
| 346 | hsa_miR_4690_5p | -18.9  | GCAAGCATGCAGCTTACTGCTT    |
| 506 | hsa_miR_663a    | -13.3  | GCAAGCATGCAGCTTACTGCTT    |
| 103 | hsa_miR_196b_5p | -13.1  | GCAAGCATGCAGCTTACTGCTTG   |
| 623 | hsa_miR_6893_5p | -14.8  | GCAAGCATGCAGCTTACTGCTTG   |
| 159 | hsa_miR_3127_3p | -17.8  | GCAGCTTACTGCTTGAAAGGGT    |
| 338 | hsa_miR_4674    | -14.3  | AGGTATGGTGCTGGGTGCAG      |
| 24  | hsa_miR_1199_5p | -16    | AGGTATGGTGCTGGGTGCAGA     |
| 437 | hsa_miR_557     | -13.3  | AGGTATGGTGCTGGGTGCAGAT    |
| 110 | hsa_miR_200b_5p | -18.1  | AGGTATGGTGCTGGGTGCAGATG   |
| 111 | hsa_miR_200c_5p | -21.2  | AGGTATGGTGCTGGGTGCAGATG   |
| 259 | hsa_miR_4280    | -15.4  | AGTCGGCTTGACTACTACTG      |
| 330 | hsa_miR_4651    | -16.6  | AGTCGGCTTGACTACTACTGTG    |
| 488 | hsa_miR_6499_3p | -17.6  | AGTCGGCTTGACTACTACTGTG    |
| 378 | hsa_miR_4761_5p | -15.4  | AGTCGGCTTGACTACTACTGTGT   |
| 321 | hsa_miR_3937    | -12.7  | AGTCGGCTTGACTACTACTGTGTGG |
| 628 | hsa_miR_7109_5p | -19.3  | AGTGATCCTCAGCCTCCAG       |
| 335 | hsa_miR_4667_5p | -20.3  | AGTGATCCTCAGCCTCCAGT      |
| 589 | hsa_miR_5572    | -18    | AGTGATCCTCAGCCTCCAGT      |

|     |                 |       |                             |
|-----|-----------------|-------|-----------------------------|
| 42  | hsa_miR_126_5p  | -14.1 | AGTGTAACCAATGATGTAATGATT    |
| 168 | hsa_miR_3152_3p | -13.5 | AGTGTGGCTCTGGATAGCACC       |
| 544 | hsa_miR_6762_3p | -13   | AGTGTGGCTCTGGATAGCACCT      |
| 142 | hsa_miR_296_3p  | -13.9 | AGTGTGGCTCTGGATAGCACCTT     |
| 264 | hsa_miR_431_3p  | -16.5 | AGTGTGGCTCTGGATAGCACCTT     |
| 744 | hsa_miR_6756_5p | -16.4 | AGTGTGGCTCTGGATAGCACCTT     |
| 92  | hsa_miR_18b_5p  | -21.4 | AGTGTGGCTCTGGATAGCACCTTA    |
| 187 | hsa_miR_328_5p  | -12.5 | AGTGTGGCTCTGGATAGCACCTTA    |
| 567 | hsa_miR_6789_5p | -22.6 | AGTGTGGCTCTGGATAGCACCTTAT   |
| 185 | hsa_miR_3200_5p | -12.5 | ATGCAGTGTGGCTCTGGATA        |
| 258 | hsa_miR_4277    | -13.4 | ATGCAGTGTGGCTCTGGATAGC      |
| 536 | hsa_miR_6753_3p | -17.4 | ATGCAGTGTGGCTCTGGATAGCACCT  |
| 318 | hsa_miR_454_5p  | -14.1 | GCAGCTTACTGCTTGAAAGGGT      |
| 614 | hsa_miR_6877_5p | -22.1 | GCAGCTTACTGCTTGAAAGGGTCTT   |
| 479 | hsa_miR_630     | -14.3 | ATGGTGCTGGGTGCAGATGCA       |
| 559 | hsa_miR_6781_3p | -14   | ATGGTGCTGGGTGCAGATGCA       |
| 674 | hsa_miR_891b    | -12.5 | ATGGTGCTGGGTGCAGATGCA       |
| 309 | hsa_miR_452_3p  | -15.1 | ATGGTGCTGGGTGCAGATGCAG      |
| 169 | hsa_miR_3152_5p | -15.4 | ATGGTGCTGGGTGCAGATGCAGT     |
| 574 | hsa_miR_6807_3p | -25.9 | ATGGTGCTGGGTGCAGATGCAGTG    |
| 680 | hsa_miR_92a_3p  | -22.9 | ATGGTGCTGGGTGCAGATGCAGTG    |
| 547 | hsa_miR_6765_3p | -20.7 | ATGGTGCTGGGTGCAGATGCAGTGTGG |
| 436 | hsa_miR_554     | -14.4 | ATTGGCACACAGGCATTAGA        |
| 640 | hsa_miR_7155_5p | -13.5 | ATTGGCACACAGGCATTAGA        |
| 489 | hsa_miR_6499_5p | -14.3 | GCATGCAGCTTACTGCTTGA        |
| 532 | hsa_miR_6749_5p | -13.5 | GCATGCAGCTTACTGCTTGA        |
| 568 | hsa_miR_6792_5p | -14   | GCATGCAGCTTACTGCTTGA        |
| 138 | hsa_miR_27b_3p  | -12.6 | GCATGCAGCTTACTGCTTGAA       |
| 230 | hsa_miR_378a_3p | -14.9 | GCCTCACCCAAGCTAGA           |
| 232 | hsa_miR_378e    | -14.5 | GCCTCACCCAAGCTAGA           |
| 248 | hsa_miR_422a    | -14.9 | GCCTCACCCAAGCTAGA           |
| 638 | hsa_miR_7152_3p | -17   | GCCTCACCCAAGCTAGA           |
| 189 | hsa_miR_330_5p  | -12.6 | GCCTCACCCAAGCTAGAGT         |
| 43  | hsa_miR_1264    | -13.7 | GCTTACTGCTTGAAAGGGTCTTG     |
| 214 | hsa_miR_365a_5p | -15.8 | GCTTACTGCTTGAAAGGGTCTTG     |
| 217 | hsa_miR_3667_5p | -18.1 | GCTTACTGCTTGAAAGGGTCTTG     |
| 457 | hsa_miR_598_5p  | -17.4 | GCTTACTGCTTGAAAGGGTCTTGC    |
| 152 | hsa_miR_3116    | -12   | CAAGCCATTGGCACACAGGCA       |
| 366 | hsa_miR_4440    | -20.4 | CAAGCCATTGGCACACAGGCA       |
| 44  | hsa_miR_1231    | -15.6 | CAAGCCATTGGCACACAGGCAT      |
| 181 | hsa_miR_297     | -17.3 | CAAGCCATTGGCACACAGGCAT      |
| 800 | hsa_miR_6813_5p | -16.1 | CAAGCCTAACTCAAGCCATTG       |
| 196 | hsa_miR_34a_5p  | -12.3 | CAAGCCTAACTCAAGCCATTGGCA    |
| 293 | hsa_miR_4492    | -16.7 | CAAGTGATCCTCAGCCTC          |
| 850 | hsa_miR_6884_5p | -17.5 | CAAGTGATCCTCAGCCTCC         |
| 250 | hsa_miR_423_5p  | -13.6 | CAAGTGATCCTCAGCCTCCCA       |
| 262 | hsa_miR_4300    | -16.7 | CAAGTGATCCTCAGCCTCCCA       |

|     |                 |        |                           |
|-----|-----------------|--------|---------------------------|
| 563 | hsa_miR_6785_5p | -19.8  | CAAGTGATCCTCAGCCTCCCA     |
| 148 | hsa_miR_30b_3p  | -23.2  | CAAGTGATCCTCAGCCTCCAG     |
| 359 | hsa_miR_4722_5p | -12.1  | CAATGATGTAATGATTCTGCC     |
| 375 | hsa_miR_4755_3p | -13.7  | GCTTACTGCTTGAAAGGGTCTTGCC |
| 323 | hsa_miR_4634    | -12.5  | GCTTGAAAGGGTCTTGCCT       |
| 682 | hsa_miR_92b_5p  | -12.4  | GCTTGAAAGGGTCTTGCCTC      |
| 687 | hsa_miR_942_5p  | -16.9  | CACAGGCATTAGACAGAAAGC     |
| 175 | hsa_miR_3160_5p | -16.3  | CACAGGCATTAGACAGAAAGCT    |
| 560 | hsa_miR_6782_3p | -12.9  | CACAGGCATTAGACAGAAAGCTG   |
| 398 | hsa_miR_5004_5p | -17    | GCTTGAAAGGGTCTTGCCTCA     |
| 27  | hsa_miR_1203    | -22.8  | CAGATGCAGTGTGGCTCTGGA     |
| 386 | hsa_miR_4787_5p | -16.7  | CAGATGCAGTGTGGCTCTGGA     |
| 514 | hsa_miR_6727_5p | -13.1  | CAGATGCAGTGTGGCTCTGGA     |
| 634 | hsa_miR_7113_5p | -18.7  | CAGATGCAGTGTGGCTCTGGA     |
| 25  | hsa_miR_1200    | -19.2  | CAGATGCAGTGTGGCTCTGGAT    |
| 417 | hsa_miR_518d_5p | -17    | CAGATGCAGTGTGGCTCTGGAT    |
| 418 | hsa_miR_518e_5p | -16.6  | CAGATGCAGTGTGGCTCTGGAT    |
| 419 | hsa_miR_518f_5p | -14.4  | CAGATGCAGTGTGGCTCTGGAT    |
| 422 | hsa_miR_519a_5p | -16.6  | CAGATGCAGTGTGGCTCTGGAT    |
| 423 | hsa_miR_519b_5p | -16.6  | CAGATGCAGTGTGGCTCTGGAT    |
| 424 | hsa_miR_519c_5p | -16.6  | CAGATGCAGTGTGGCTCTGGAT    |
| 425 | hsa_miR_520c_5p | -17    | CAGATGCAGTGTGGCTCTGGAT    |
| 427 | hsa_miR_522_5p  | -16.6  | CAGATGCAGTGTGGCTCTGGAT    |
| 428 | hsa_miR_523_5p  | -16.6  | CAGATGCAGTGTGGCTCTGGAT    |
| 430 | hsa_miR_526a    | -17    | CAGATGCAGTGTGGCTCTGGAT    |
| 167 | hsa_miR_3151_5p | -20.9  | GCTTGAAAGGGTCTTGCCTCACC   |
| 667 | hsa_miR_8085    | -17.8  | GCTTGAAAGGGTCTTGCCTCACCCA |
| 686 | hsa_miR_939_5p  | -19.4  | GCTTGAAAGGGTCTTGCCTCACCCA |
| 653 | hsa_miR_626     | -14.6  | CAGGCATTAGACAGAAAGCT      |
| 114 | hsa_miR_21_5p   | -12.6  | CAGGCATTAGACAGAAAGCTG     |
| 57  | hsa_miR_1301_3p | -15.5  | CAGGCATTAGACAGAAAGCTGGAA  |
| 362 | hsa_miR_4729    | -12.1  | CAGTGTAACCAATGATGTAATGA   |
| 319 | hsa_miR_455_3p  | -16.6  | CAGTGTGGCTCTGGATAGC       |
| 85  | hsa_miR_182_3p  | -13.6  | CAGTGTGGCTCTGGATAGCACCT   |
| 531 | hsa_miR_6747_5p | -16.7  | CAGTGTGGCTCTGGATAGCACCTTA |
| 310 | hsa_miR_4520_5p | -15.8  | CATGATTGAAGAAATGCAGG      |
| 528 | hsa_miR_6744_5p | -12.4  | GGGTCTTGCCTCACCCA         |
| 671 | hsa_miR_887_5p  | -15.3  | GGGTCTTGCCTCACCCAAG       |
| 77  | hsa_miR_149_5p  | -14.79 | GGGTCTTGCCTCACCCAAGCTAGA  |
| 265 | hsa_miR_4315    | -13.2  | CATTAGACAGAAAGCTGG        |
| 238 | hsa_miR_3925_3p | -13.6  | CATTAGACAGAAAGCTGGAAGT    |
| 254 | hsa_miR_33b_3p  | -12.7  | CATTGGCACACAGGCATTA       |
| 300 | hsa_miR_4502    | -14.3  | CATTGGCACACAGGCATTAGA     |
| 390 | hsa_miR_4799_5p | -14.8  | CATTGGCACACAGGCATTAGAC    |
| 439 | hsa_miR_5579_3p | -12    | GGTCTTGCCTCACCCAAGCTAG    |
| 379 | hsa_miR_4763_3p | -12.6  | CCAATGATGTAATGATTCTGCCA   |
| 262 | hsa_miR_34a_5p  | -14.7  | CCAATGATGTAATGATTCTGCCA   |

|     |                 |        |                           |
|-----|-----------------|--------|---------------------------|
| 231 | hsa_miR_378c    | -13.8  | GGTCTTGCCTCACCCAAGCTAGA   |
| 144 | hsa_miR_301b_5p | -12.4  | GGTCTTGCCTCACCCAAGCTAGAGT |
| 522 | hsa_miR_6740_5p | -12.2  | GTATTATTTTTTCATCTTCAAACA  |
| 402 | hsa_miR_5008_5p | -15.8  | CCATTGGCACACAGGCATTA      |
| 683 | hsa_miR_934     | -12.5  | CCATTGGCACACAGGCATTAGACA  |
| 325 | hsa_miR_4639_5p | -14.2  | CCTAACTCAAGCCATTGGCAC     |
| 336 | hsa_miR_4669    | -14.2  | CCTAACTCAAGCCATTGGCACA    |
| 575 | hsa_miR_6807_5p | -22.1  | CCTAACTCAAGCCATTGGCACAC   |
| 646 | hsa_miR_760     | -15    | GTCTTGCCTCACCCAAGCTA      |
| 382 | hsa_miR_4774_5p | -12.4  | GTCTTGCCTCACCCAAGCTAGA    |
| 51  | hsa_miR_1287_3p | -14.8  | GTCTTGCCTCACCCAAGCTAGAG   |
| 415 | hsa_miR_514a_5p | -12.6  | GTCTTGCCTCACCCAAGCTAGAGTG |
| 290 | hsa_miR_4486    | -19.4  | CCTCAGCCTCCCAGT           |
| 240 | hsa_miR_3929    | -18.5  | CCTTTGAAGCTTACTACAGCCTC   |
| 132 | hsa_miR_2467_5p | -15.7  | CCTTTGAAGCTTACTACAGCCTCA  |
| 21  | hsa_miR_1181    | -13.66 | CGGCTTGACTACACTGTGTGG     |
| 337 | hsa_miR_4672    | -12.2  | CGGCTTGACTACACTGTGTGG     |
| 356 | hsa_miR_4717_3p | -16.7  | CGGCTTGACTACACTGTGTGG     |
| 391 | hsa_miR_4804_5p | -14.1  | CGGCTTGACTACACTGTGTGG     |
| 902 | hsa_miR_770_5p  | -12.9  | CGGCTTGACTACACTGTGTGGA    |
| 26  | hsa_miR_1202    | -17.5  | CTAACTCAAGCCATTGGCAC      |
| 569 | hsa_miR_6793_5p | -13.7  | CTAACTCAAGCCATTGGCACACA   |
| 256 | hsa_miR_4265    | -14.1  | CTCAAGCCATTGGCACACAG      |
| 401 | hsa_miR_5008_3p | -16.4  | CTCAAGCCATTGGCACACAGG     |
| 451 | hsa_miR_5705    | -14.3  | CTCAAGCCATTGGCACACAGGCA   |
| 811 | hsa_miR_6821_5p | -18.1  | CTCAAGCCATTGGCACACAGGCAT  |
| 29  | hsa_miR_1205    | -13    | CTCAAGTGATCCTCAGC         |
| 622 | hsa_miR_604     | -14.4  | CTCAAGTGATCCTCAGCCT       |
| 494 | hsa_miR_4748    | -18.5  | CTCAAGTGATCCTCAGCCTC      |
| 179 | hsa_miR_3180    | -14.5  | CTCAAGTGATCCTCAGCCTCC     |
| 228 | hsa_miR_3689d   | -17.1  | CTCAAGTGATCCTCAGCCTCCC    |
| 592 | hsa_miR_6835_5p | -14.9  | CTCAAGTGATCCTCAGCCTCCC    |
| 626 | hsa_miR_7106_5p | -25.9  | CTCAAGTGATCCTCAGCCTCCCA   |
| 248 | hsa_miR_328_5p  | -22    | CTCAAGTGATCCTCAGCCTCCCA   |
| 707 | hsa_miR_6731_5p | -18.1  | CTCAAGTGATCCTCAGCCTCCCA   |
| 870 | hsa_miR_7110_5p | -20    | CTCAAGTGATCCTCAGCCTCCCA   |
| 515 | hsa_miR_6728_5p | -18.2  | CTCAAGTGATCCTCAGCCTCCCAG  |
| 520 | hsa_miR_6737_5p | -13    | CTCAAGTGATCCTCAGCCTCCCAG  |
| 182 | hsa_miR_3192_5p | -21.5  | CTCAAGTGATCCTCAGCCTCCCAGT |
| 283 | hsa_miR_4454    | -13.7  | TACTGCTTGAAAGGGTCT        |
| 621 | hsa_miR_6892_5p | -13.4  | TACTGCTTGAAAGGGTCTTGC     |
| 461 | hsa_miR_6069    | -15.6  | TACTGCTTGAAAGGGTCTTGCCT   |
| 583 | hsa_miR_6817_5p | -17.8  | TCACCCAAGCTAGAGTGCAGT     |
| 218 | hsa_miR_367_3p  | -25.5  | TCACCCAAGCTAGAGTGCAGTG    |
| 253 | hsa_miR_4257    | -12.7  | CTCTGGATAGCACCTTATGG      |
| 649 | hsa_miR_616_3p  | -12.9  | CTGCCAAATGAAATATAATGATA   |
| 676 | hsa_miR_892b    | -17    | TCACCCAAGCTAGAGTGCAGTG    |

|     |                 |       |                            |
|-----|-----------------|-------|----------------------------|
| 282 | hsa_miR_4453    | -13.7 | TCTTGCCTCACCCAAGCTA        |
| 301 | hsa_miR_4505    | -14   | TCTTGCCTCACCCAAGCTA        |
| 61  | hsa_miR_1307_3p | -13.8 | TCTTGCCTCACCCAAGCTAGAGT    |
| 324 | hsa_miR_4638_5p | -16.9 | TCTTGCCTCACCCAAGCTAGAGT    |
| 644 | hsa_miR_744_5p  | -13.9 | TGAAAGGGTCTTGCCTCACC       |
| 209 | hsa_miR_363_5p  | -12.3 | TGAAAGGGTCTTGCCTCACCCA     |
| 631 | hsa_miR_7111_5p | -17.7 | TGAAAGGGTCTTGCCTCACCCA     |
| 45  | hsa_miR_1271_3p | -12.4 | TGACCACAACAAGCAAGCATG      |
| 766 | hsa_miR_6777_3p | -13.1 | CTGGAAGTTGAAATGGTGGGA      |
| 466 | hsa_miR_6084    | -18.9 | CTGGAAGTTGAAATGGTGGAG      |
| 546 | hsa_miR_6763_3p | -15.6 | CTGGAAGTTGAAATGGTGGAG      |
| 247 | hsa_miR_412_3p  | -16.6 | CTGGAAGTTGAAATGGTGGAGT     |
| 594 | hsa_miR_6837_3p | -13.8 | CTGGAAGTTGAAATGGTGGAGT     |
| 70  | hsa_miR_144_5p  | -12.5 | CTGGAAGTTGAAATGGTGGAGTCC   |
| 635 | hsa_miR_7114_3p | -15.6 | CTGGAAGTTGAAATGGTGGAGTCC   |
| 581 | hsa_miR_6815_3p | -12.7 | CTGGAAGTTGAAATGGTGGAGTCCA  |
| 627 | hsa_miR_6069    | -13.5 | CTGGGCTCAAGTGATCCTCAGCCT   |
| 33  | hsa_miR_1228_3p | -18.7 | CTGGGTGCAGATGCAGTGTGG      |
| 203 | hsa_miR_3620_3p | -30.7 | CTGGGTGCAGATGCAGTGTGG      |
| 578 | hsa_miR_6812_3p | -18.4 | CTGGGTGCAGATGCAGTGTGG      |
| 313 | hsa_miR_4529_3p | -14.7 | CTGGGTGCAGATGCAGTGTGGC     |
| 554 | hsa_miR_6777_3p | -17.3 | CTGGGTGCAGATGCAGTGTGGC     |
| 130 | hsa_miR_24_2_5p | -16.3 | CTGGGTGCAGATGCAGTGTGGCT    |
| 320 | hsa_miR_4632_3p | -18.8 | CTGGGTGCAGATGCAGTGTGGCT    |
| 102 | hsa_miR_196a_3p | -13.1 | CTGGGTGCAGATGCAGTGTGGCTC   |
| 201 | hsa_miR_3619_3p | -17.9 | CTGGGTGCAGATGCAGTGTGGCTC   |
| 527 | hsa_miR_5001_5p | -15.5 | CTGGGTGCAGATGCAGTGTGGCTCT  |
| 211 | hsa_miR_3651    | -12.6 | CTGGGTGCAGATGCAGTGTGGCTCTG |
| 463 | hsa_miR_608     | -15   | CTGGGTGCAGATGCAGTGTGGCTCTG |
| 448 | hsa_miR_5696    | -15.9 | TGCAGCTTACTGCTTGAAAGGG     |
| 458 | hsa_miR_601     | -12   | TGCCTCACCCAAGCTAGAGTG      |
| 388 | hsa_miR_4793_3p | -20.1 | TGCCTCACCCAAGCTAGAGTGCAGT  |
| 134 | hsa_miR_25_5p   | -14.4 | TGCTTGAAAGGGTCTTGCCT       |
| 151 | hsa_miR_31_5p   | -21.2 | TGCTTGAAAGGGTCTTGCCT       |
| 5   | hsa_let_7e_5p   | -15.3 | TGCTTGAAAGGGTCTTGCCTCA     |
| 334 | hsa_miR_4661_3p | -12.7 | CTTCTGGGCTCAAGTGATCCTC     |
| 306 | hsa_miR_450b_3p | -12.7 | CTTCTGGGCTCAAGTGATCCTCAG   |
| 158 | hsa_miR_3126_5p | -14.9 | TGCTTGAAAGGGTCTTGCCTCA     |
| 35  | hsa_miR_1238_5p | -14.8 | TGCTTGAAAGGGTCTTGCCTCAC    |
| 235 | hsa_miR_381_5p  | -15.7 | TGCTTGAAAGGGTCTTGCCTCACC   |
| 162 | hsa_miR_3132    | -16.5 | TGCTTGAAAGGGTCTTGCCTCACCCA |
| 660 | hsa_miR_8068    | -16.9 | TTAATGACCACAACAAGCA        |
| 609 | hsa_miR_6864_3p | -12.6 | TTGAAAGGGTCTTGCCTCAC       |
| 432 | hsa_miR_541_3p  | -15.1 | TTGAAAGGGTCTTGCCTCACCC     |
| 533 | hsa_miR_675_5p  | -18.5 | TTGAAAGGGTCTTGCCTCACCC     |
| 537 | hsa_miR_6754_3p | -14.1 | CTTGGGTAAGGACATGAAGA       |
| 481 | hsa_miR_636     | -13.9 | CTTGGGTAAGGACATGAAGACA     |



|     |                 |        |                           |
|-----|-----------------|--------|---------------------------|
| 539 | hsa_miR_6755_3p | -18    | CTTGGGTAAGGACATGAAGACA    |
| 616 | hsa_miR_6884_5p | -15.6  | CTTTGAAGCTTACTACAGCCTCA   |
| 340 | hsa_miR_4676_3p | -16    | GAAAGCTGGAAGTTGAAATGGTG   |
| 277 | hsa_miR_3622b_5 | 13.4   | CTGCTTGAAAGGGTCTTGCCT     |
| 278 | hsa_miR_3622b_5 | 15     | GGTCTTGCCTCACCCAAGCTA     |
| 607 | hsa_miR_5698    | -16.3  | AAAGGGTCTTGCCTCACCCA      |
| 893 | hsa_miR_762     | -20.8  | AAAGGGTCTTGCCTCACCCA      |
| 718 | hsa_miR_6741_5p | -22.9  | AAAGGGTCTTGCCTCACCCAA     |
| 768 | hsa_miR_6779_5p | -17.1  | AAAGGGTCTTGCCTCACCCAA     |
| 735 | hsa_miR_6751_5p | -14.6  | GAAGATTAACACAGTGTCTCCAA   |
| 273 | hsa_miR_4419b   | -14.2  | GAAGCTTACTACAGCCTC        |
| 393 | hsa_miR_485_5p  | -14.6  | GAAGCTTACTACAGCCTCA       |
| 473 | hsa_miR_6134    | -14.1  | GAAGCTTACTACAGCCTCA       |
| 287 | hsa_miR_4474_3p | -15.3  | GAAGCTTACTACAGCCTCAA      |
| 409 | hsa_miR_5087    | -12    | GAAGCTTACTACAGCCTCAA      |
| 641 | hsa_miR_610     | -14.7  | AACAAGCAAGCATGCAGCTTA     |
| 513 | hsa_miR_4787_5p | -12.7  | AACAAGCAAGCATGCAGCTTACTGC |
| 924 | hsa_miR_8081    | -13.8  | GACTCAGAATTCATGATTGAAG    |
| 284 | hsa_miR_4466    | -15.4  | GAGAGTCGGCTTGACTA         |
| 186 | hsa_miR_323a_5p | -13.4  | GAGAGTCGGCTTGACTACT       |
| 414 | hsa_miR_512_5p  | -13.12 | GAGAGTCGGCTTGACTACTGTGTG  |
| 661 | hsa_miR_8069    | -12.9  | GAGCAAGCCTAACTCAAGCCATTG  |
| 98  | hsa_miR_1913    | -16.7  | GAGGTATGGTGCTGGGTGCAGA    |
| 645 | hsa_miR_758_3p  | -13.9  | GAGGTATGGTGCTGGGTGCAGA    |
| 125 | hsa_miR_2277_5p | -12.9  | GAGTCGGCTTGACTACTGTGTG    |
| 197 | hsa_miR_34b_5p  | -19.3  | GAGTCGGCTTGACTACTGTGTG    |
| 594 | hsa_miR_5580_3p | -16    | GAGTCGGCTTGACTACTGTGTG    |
| 174 | hsa_miR_3158_5p | -12.6  | GAGTCGGCTTGACTACTGTGTGG   |
| 224 | hsa_miR_3687    | -14.5  | GAGTCGGCTTGACTACTGTGTGGA  |
| 373 | hsa_miR_4749_5p | -15.9  | GATCCTCAGCCTCCCAGTG       |
| 856 | hsa_miR_6890_5p | -13.8  | GATCCTCAGCCTCCCAGTG       |
| 473 | hsa_miR_4717_3p | -22    | GATCCTCAGCCTCCCAGTGG      |
| 19  | hsa_miR_1178_5p | -14    | GATGCAGTGTGGCTCTG         |
| 263 | hsa_miR_4302    | -12.6  | GATGCAGTGTGGCTCTGG        |
| 487 | hsa_miR_645     | -14.1  | GATGCAGTGTGGCTCTGGA       |
| 136 | hsa_miR_26a_1_3 | -16.6  | GATGCAGTGTGGCTCTGGATAGC   |
| 155 | hsa_miR_3120_5p | -17.2  | GATGCAGTGTGGCTCTGGATAGC   |
| 493 | hsa_miR_6501_5p | -18.7  | GATGCAGTGTGGCTCTGGATAGCA  |
| 650 | hsa_miR_767_5p  | -12.2  | GATTTTCAGTGTAACCAATGATGTA |
| 389 | hsa_miR_4498    | -15.3  | AAGCAAGCATGCAGCTTA        |
| 563 | hsa_miR_5190    | -12.2  | AAGCAAGCATGCAGCTTACTGC    |
| 374 | hsa_miR_4466    | -15.1  | AAGGGTCTTGCCTCACCC        |
| 436 | hsa_miR_4656    | -21.3  | AAGGGTCTTGCCTCACCCA       |
| 843 | hsa_miR_6870_5p | -12.4  | AAGGGTCTTGCCTCACCCA       |
| 324 | hsa_miR_3940_5p | -23.8  | AAGGGTCTTGCCTCACCCAA      |
| 400 | hsa_miR_4507    | -20    | AAGGGTCTTGCCTCACCCAA      |
| 626 | hsa_miR_6069    | -15.6  | AAGGGTCTTGCCTCACCCAAGCTA  |

|     |                 |       |                             |
|-----|-----------------|-------|-----------------------------|
| 28  | hsa_miR_1184    | -13.2 | AATGACCACAACAAGCAAGCATGCAGC |
| 243 | hsa_miR_3940_5p | -20.1 | GCAAGCCTAACTCAAGCCAT        |
| 302 | hsa_miR_4507    | -18.7 | GCAAGCCTAACTCAAGCCAT        |
| 431 | hsa_miR_532_5p  | -13.8 | GCAAGCCTAACTCAAGCCATT       |
| 221 | hsa_miR_3677_5p | -13.2 | GCAAGCCTAACTCAAGCCATTG      |
| 657 | hsa_miR_632     | -14.3 | GCACACAGGCATTAGACAG         |
| 147 | hsa_miR_30a_3p  | -15.9 | GCACACAGGCATTAGACAGAAAG     |
| 149 | hsa_miR_30d_3p  | -17.3 | GCACACAGGCATTAGACAGAAAG     |
| 150 | hsa_miR_30e_3p  | -12.7 | GCACACAGGCATTAGACAGAAAG     |
| 280 | hsa_miR_4446_3p | -16.6 | GCAGATGCAGTGTGGCTCTG        |
| 408 | hsa_miR_505_5p  | -16.6 | GCAGATGCAGTGTGGCTCTG        |
| 540 | hsa_miR_6755_5p | -14.2 | GCAGATGCAGTGTGGCTCTG        |
| 599 | hsa_miR_6845_5p | -15.5 | GCAGATGCAGTGTGGCTCTG        |
| 806 | hsa_miR_6816_5p | -15.4 | GCAGATGCAGTGTGGCTCTG        |
| 56  | hsa_miR_1296_5p | -17   | GCAGATGCAGTGTGGCTCTGG       |
| 202 | hsa_miR_3619_5p | -13.1 | GCAGATGCAGTGTGGCTCTGG       |
| 450 | hsa_miR_5704    | -14.6 | GCAGATGCAGTGTGGCTCTGG       |
| 199 | hsa_miR_3591_5p | -15.3 | GCAGATGCAGTGTGGCTCTGGA      |
| 595 | hsa_miR_6837_5p | -18.6 | GCAGATGCAGTGTGGCTCTGGA      |
| 732 | hsa_miR_6751_5p | -14.4 | GCAGATGCAGTGTGGCTCTGGA      |
| 64  | hsa_miR_1343_3p | -18.9 | GCAGATGCAGTGTGGCTCTGGAT     |
| 7   | hsa_let_7g_3p   | -19.3 | GCAGATGCAGTGTGGCTCTGGATAG   |
| 149 | hsa_miR_221_3p  | -13.6 | ACAACAAGCAAGCATGCAGCT       |
| 685 | hsa_miR_656_5p  | -12.8 | ACAACAAGCAAGCATGCAGCTT      |
| 114 | hsa_miR_18b_5p  | -12.2 | ACAACAAGCAAGCATGCAGCTTA     |
| 953 | hsa_miR_99b_3p  | -14.9 | ACAACAAGCAAGCATGCAGCTTA     |
| 444 | hsa_miR_5586_5p | -15.5 | GCAGTGTGGCTCTGGATA          |
| 668 | hsa_miR_8086    | -14   | GCAGTGTGGCTCTGGATAGCA       |
| 193 | hsa_miR_33b_5p  | -17.6 | GCAGTGTGGCTCTGGATAGCAC      |
| 394 | hsa_miR_487a_5p | -13.4 | GCAGTGTGGCTCTGGATAGCAC      |
| 349 | hsa_miR_4694_5p | -23.9 | GCAGTGTGGCTCTGGATAGCACCT    |
| 358 | hsa_miR_4721    | -21.1 | GCAGTGTGGCTCTGGATAGCACCTTA  |
| 601 | hsa_miR_6848_5p | -20.6 | GCAGTGTGGCTCTGGATAGCACCTTA  |
| 323 | hsa_miR_3940_5p | -15.3 | ACAAGCAAGCATGCAGCTTAC       |
| 152 | hsa_miR_222_3p  | -13.1 | ACCACAACAAGCAAGCATGCAGCT    |
| 934 | hsa_miR_891a_3p | -17.7 | ACCACAACAAGCAAGCATGCAGCT    |
| 613 | hsa_miR_5787    | -12.7 | ACCACAACAAGCAAGCATGCAGCTT   |
| 188 | hsa_miR_30a_3p  | -14.1 | GCATTAGACAGAAAGCTGGAAG      |
| 192 | hsa_miR_30d_3p  | -16.8 | GCATTAGACAGAAAGCTGGAAG      |
| 195 | hsa_miR_30e_3p  | -14.4 | GCATTAGACAGAAAGCTGGAAG      |
| 317 | hsa_miR_454_3p  | -12.8 | GCCATTGGCACACAGGCATTA       |
| 80  | hsa_miR_155_5p  | -12.8 | GCCATTGGCACACAGGCATTAG      |
| 15  | hsa_miR_105_5p  | -13.9 | GCCATTGGCACACAGGCATTAGA     |
| 31  | hsa_miR_1199_5p | -12   | GCCATTGGCACACAGGCATTAGA     |
| 922 | hsa_miR_8078    | -12.9 | GCCATTGGCACACAGGCATTAGACA   |
| 562 | hsa_miR_6784_5p | -20.3 | GCCTAACTCAAGCCATTGGC        |
| 928 | hsa_miR_8086    | -12.7 | GCCTAACTCAAGCCATTGGCA       |

|     |                 |        |                            |
|-----|-----------------|--------|----------------------------|
| 586 | hsa_miR_6821_5p | -23.1  | GCCTAACTCAAGCCATTGGCAC     |
| 885 | hsa_miR_7160_3p | -21.4  | ACTGCTTGAAAGGGTCTTG        |
| 492 | hsa_miR_4746_3p | -12.1  | ACTGCTTGAAAGGGTCTTGCC      |
| 601 | hsa_miR_5589_5p | -17    | ACTGCTTGAAAGGGTCTTGCC      |
| 505 | hsa_miR_4763_3p | -19.5  | ACTGCTTGAAAGGGTCTTGCC      |
| 170 | hsa_miR_2682_5p | -15.1  | ACTGCTTGAAAGGGTCTTGCC      |
| 668 | hsa_miR_6499_3p | -13.5  | AGCAAGCATGCAGCTTACTGCT     |
| 462 | hsa_miR_6073    | -12.9  | GCCTTTGAAGCTTACTACA        |
| 188 | hsa_miR_329_5p  | -12.7  | GCCTTTGAAGCTTACTACAGCCTC   |
| 529 | hsa_miR_5001_5p | -15    | GCCTTTGAAGCTTACTACAGCCTC   |
| 729 | hsa_miR_6747_5p | -14.8  | GCCTTTGAAGCTTACTACAGCCTC   |
| 564 | hsa_miR_6787_5p | -15.5  | GCTCAAGTGATCCTCAGCCT       |
| 894 | hsa_miR_762     | -21.76 | GCTCAAGTGATCCTCAGCCTC      |
| 468 | hsa_miR_6087    | -19.4  | GCTCAAGTGATCCTCAGCCTCC     |
| 385 | hsa_miR_4489    | -12.2  | GCTCAAGTGATCCTCAGCCTCC     |
| 522 | hsa_miR_485_5p  | -13    | GCTCAAGTGATCCTCAGCCTCC     |
| 23  | hsa_miR_1193    | -14.7  | GCTCAAGTGATCCTCAGCCTCCC    |
| 535 | hsa_miR_6752_5p | -22.2  | GCTCAAGTGATCCTCAGCCTCCC    |
| 70  | hsa_miR_1293    | -20    | GCTCAAGTGATCCTCAGCCTCCCA   |
| 701 | hsa_miR_6726_5p | -20.1  | GCTCAAGTGATCCTCAGCCTCCCA   |
| 227 | hsa_miR_3689c   | -20.8  | GCTCAAGTGATCCTCAGCCTCCCAG  |
| 351 | hsa_miR_4700_5p | -20.1  | GCTCAAGTGATCCTCAGCCTCCCAGT |
| 482 | hsa_miR_637     | -19.9  | GCTCAAGTGATCCTCAGCCTCCCAGT |
| 459 | hsa_miR_604     | -12    | GCTCTGGATAGCACCT           |
| 440 | hsa_miR_558     | -12.2  | GCTCTGGATAGCACCTTA         |
| 588 | hsa_miR_6824_5p | -17.6  | GCTCTGGATAGCACCTTAT        |
| 270 | hsa_miR_433_3p  | -14    | GCTCTGGATAGCACCTTATGGA     |
| 104 | hsa_miR_197_3p  | -17.7  | GCTGGAAGTTGAAATGGTGGGA     |
| 66  | hsa_miR_136_5p  | -14    | GCTGGAAGTTGAAATGGTGGAGT    |
| 412 | hsa_miR_5096    | -13.8  | GCTGGAAGTTGAAATGGTGGAGT    |
| 649 | hsa_miR_766_3p  | -17.7  | GCTGGAAGTTGAAATGGTGGAGT    |
| 476 | hsa_miR_617     | -15.4  | GCTGGAAGTTGAAATGGTGGAGTCC  |
| 410 | hsa_miR_509_3_5 | -13.2  | GCTGGGTGCAGATGCAGTG        |
| 68  | hsa_miR_139_5p  | -23.5  | GCTGGGTGCAGATGCAGTGTGGC    |
| 229 | hsa_miR_370_3p  | -18.4  | GCTGGGTGCAGATGCAGTGTGGC    |
| 316 | hsa_miR_4539    | -19.1  | GCTGGGTGCAGATGCAGTGTGGC    |
| 12  | hsa_miR_103a_3p | -14.4  | GCTGGGTGCAGATGCAGTGTGGCT   |
| 18  | hsa_miR_107     | -14.4  | GCTGGGTGCAGATGCAGTGTGGCT   |
| 129 | hsa_miR_24_1_5p | -19.6  | GCTGGGTGCAGATGCAGTGTGGCT   |
| 610 | hsa_miR_6869_3p | -29.4  | GCTGGGTGCAGATGCAGTGTGGCT   |
| 598 | hsa_miR_5589_5p | -13.6  | GCTGGGTGCAGATGCAGTGTGGCT   |
| 442 | hsa_miR_5582_5p | -13.2  | GCTGGGTGCAGATGCAGTGTGGCTC  |
| 637 | hsa_miR_7151_5p | -18.9  | GCTGGGTGCAGATGCAGTGTGGCTC  |
| 331 | hsa_miR_4656    | -13.7  | GCTGGGTGCAGATGCAGTGTGGCTCT |
| 891 | hsa_miR_762     | -16.9  | GCTGGGTGCAGATGCAGTGTGGCTCT |
| 169 | hsa_miR_2682_5p | -17.4  | AGCAAGCATGCAGCTTACTGCTTG   |
| 353 | hsa_miR_431_3p  | -13.8  | AGCAAGCATGCAGCTTACTGCTTG   |

|     |                 |       |                             |
|-----|-----------------|-------|-----------------------------|
| 760 | hsa_miR_6772_5p | -16.2 | AGCAAGCATGCAGCTTACTGCTTG    |
| 526 | hsa_miR_498     | -15.5 | AGCATGCAGCTTACTGCTTGAAA     |
| 174 | hsa_miR_27a_5p  | -13.8 | AGCTTACTGCTTGAAAGGGTCTT     |
| 468 | hsa_miR_4710    | -19   | AGGGTCTTGCTCACCC            |
| 557 | hsa_miR_518d_5p | -12.9 | AGGGTCTTGCTCACCCAAGCTAGAG   |
| 561 | hsa_miR_518f_5p | -12.9 | AGGGTCTTGCTCACCCAAGCTAGAG   |
| 573 | hsa_miR_520c_5p | -12.9 | AGGGTCTTGCTCACCCAAGCTAGAG   |
| 581 | hsa_miR_526a    | -12.9 | AGGGTCTTGCTCACCCAAGCTAGAG   |
| 273 | hsa_miR_3620_5p | -17   | CAACAAGCAAGCATGCAGCTTAC     |
| 849 | hsa_miR_6884_5p | -12.3 | CAACAAGCAAGCATGCAGCTTACT    |
| 132 | hsa_miR_199a_3p | -14.6 | CAAGCAAGCATGCAGCTTACTGC     |
| 135 | hsa_miR_199b_3p | -14.6 | CAAGCAAGCATGCAGCTTACTGC     |
| 367 | hsa_miR_4440    | -17.6 | CAAGCAAGCATGCAGCTTACTGCT    |
| 491 | hsa_miR_4746_3p | -15.9 | CAAGCATGCAGCTTACTGCT        |
| 862 | hsa_miR_6895_3p | -13.3 | GCTTGGGTAAGGACATGAAGACA     |
| 368 | hsa_miR_4742_3p | -13.6 | GCTTGGGTAAGGACATGAAGACAGT   |
| 227 | hsa_miR_3160_5p | -14.5 | GGAAGTTGAAATGGTGGAGTC       |
| 943 | hsa_miR_92b_3p  | -12.6 | GGAAGTTGAAATGGTGGAGTC       |
| 153 | hsa_miR_3118    | -13.4 | GGAAGTTGAAATGGTGGAGTCCA     |
| 684 | hsa_miR_937_5p  | -15.8 | GGAGAGTCGGCTTGACTACAC       |
| 119 | hsa_miR_216a_3p | -13   | GGAGAGTCGGCTTGACTACACTGTGT  |
| 234 | hsa_miR_381_3p  | -14.9 | GGAGAGTCGGCTTGACTACACTGTGTG |
| 10  | hsa_miR_101_5p  | -14.6 | GGCATTAGACAGAAAGCTG         |
| 421 | hsa_miR_5195_3p | -16.3 | GGCATTAGACAGAAAGCTGGAA      |
| 163 | hsa_miR_3135b   | -13   | GGCCTTTGAAGCTTACTACAGCC     |
| 920 | hsa_miR_8077    | -17.6 | GGCCTTTGAAGCTTACTACAGCC     |
| 587 | hsa_miR_6822_3p | -12.5 | GGCCTTTGAAGCTTACTACAGCCT    |
| 469 | hsa_miR_6089    | -14.4 | GGCCTTTGAAGCTTACTACAGCCTCA  |
| 352 | hsa_miR_4710    | -15.2 | GGCTCAAGTGATCCTCAGCC        |
| 453 | hsa_miR_5787    | -20.8 | GGCTCAAGTGATCCTCAGCCT       |
| 277 | hsa_miR_4437    | -14.4 | GGCTCAAGTGATCCTCAGCCTC      |
| 173 | hsa_miR_27a_5p  | -14.9 | GGCTCAAGTGATCCTCAGCCTC      |
| 530 | hsa_miR_5001_5p | -16.7 | GGCTCAAGTGATCCTCAGCCTC      |
| 1   | hsa_let_7b_5p   | -12.6 | GGCTCAAGTGATCCTCAGCCTCC     |
| 2   | hsa_let_7c_5p   | -12.6 | GGCTCAAGTGATCCTCAGCCTCC     |
| 4   | hsa_let_7d_5p   | -13.2 | GGCTCAAGTGATCCTCAGCCTCC     |
| 87  | hsa_miR_185_3p  | -15.3 | GGCTCAAGTGATCCTCAGCCTCC     |
| 180 | hsa_miR_3180_3p | -15.3 | GGCTCAAGTGATCCTCAGCCTCC     |
| 241 | hsa_miR_3197    | -18.3 | GGCTCAAGTGATCCTCAGCCTCC     |
| 465 | hsa_miR_4697_5p | -17.8 | GGCTCAAGTGATCCTCAGCCTCCC    |
| 361 | hsa_miR_4728_5p | -20.1 | GGCTCAAGTGATCCTCAGCCTCCCA   |
| 888 | hsa_miR_744_5p  | -16.3 | GGCTCAAGTGATCCTCAGCCTCCCA   |
| 926 | hsa_miR_8085    | -19.9 | GGCTCAAGTGATCCTCAGCCTCCCA   |
| 345 | hsa_miR_4689    | -13.6 | GGCTCTGGATAGCACCTTAT        |
| 220 | hsa_miR_3677_3p | -15.8 | GGCTCTGGATAGCACCTTATGGA     |
| 374 | hsa_miR_4750_5p | -18.1 | GGCTTGACTACACTGTGTGGA       |
| 617 | hsa_miR_6886_5p | -14.1 | GGCTTGACTACACTGTGTGGA       |

|     |                 |        |                             |
|-----|-----------------|--------|-----------------------------|
| 906 | hsa_miR_7974    | -17.9  | GGGCTCAAGTGATCCTCAGCCT      |
| 161 | hsa_miR_2467_5p | -13.9  | GGGCTCAAGTGATCCTCAGCCTCC    |
| 636 | hsa_miR_6089    | -22.84 | GGGCTCAAGTGATCCTCAGCCTCC    |
| 916 | hsa_miR_8069    | -19.1  | GGGCTCAAGTGATCCTCAGCCTCC    |
| 195 | hsa_miR_345_5p  | -13    | GGGTAAGGACATGAAGACAGT       |
| 656 | hsa_miR_7974    | -14.94 | GGGTAAGGACATGAAGACAGTTC     |
| 629 | hsa_miR_6073    | -15.2  | CAAGCATGCAGCTTACTGCT        |
| 128 | hsa_miR_1972    | -12.5  | CAAGCATGCAGCTTACTGCTTGA     |
| 460 | hsa_miR_4692    | -15.9  | CAAGCATGCAGCTTACTGCTTGA     |
| 93  | hsa_miR_1469    | -14.4  | CAAGCATGCAGCTTACTGCTTGAA    |
| 409 | hsa_miR_4520_5p | -13.4  | CACAACAAGCAAGCATGCAGC       |
| 212 | hsa_miR_3135b   | -15.1  | CACAACAAGCAAGCATGCAGCT      |
| 907 | hsa_miR_7974    | -13.6  | CACAACAAGCAAGCATGCAGCTT     |
| 803 | hsa_miR_6814_3p | -12.3  | CACCCAAGCTAGAGTGCAGT        |
| 162 | hsa_miR_2467_5p | -16.1  | CAGCTTACTGCTTGAAAGGGTCTTG   |
| 48  | hsa_miR_1279    | -12    | GGGTGCAGATGCAGTGTGG         |
| 126 | hsa_miR_23a_3p  | -13.2  | GGGTGCAGATGCAGTGTGGC        |
| 128 | hsa_miR_23c     | -16.7  | GGGTGCAGATGCAGTGTGGC        |
| 223 | hsa_miR_3683    | -12.7  | GGGTGCAGATGCAGTGTGGCT       |
| 252 | hsa_miR_4252    | -20    | GGGTGCAGATGCAGTGTGGCT       |
| 435 | hsa_miR_548v    | -20.3  | GGGTGCAGATGCAGTGTGGCT       |
| 477 | hsa_miR_621     | -13.8  | GGGTGCAGATGCAGTGTGGCT       |
| 485 | hsa_miR_642b_3p | -14.1  | GGGTGCAGATGCAGTGTGGCT       |
| 659 | hsa_miR_8064    | -14.2  | GGGTGCAGATGCAGTGTGGCT       |
| 285 | hsa_miR_4467    | -12.8  | GGGTGCAGATGCAGTGTGGCTC      |
| 116 | hsa_miR_2114_3p | -16    | GGGTGCAGATGCAGTGTGGCTCT     |
| 139 | hsa_miR_27b_5p  | -14.7  | GGGTGCAGATGCAGTGTGGCTCT     |
| 274 | hsa_miR_4424    | -12.4  | GGGTGCAGATGCAGTGTGGCTCT     |
| 314 | hsa_miR_4537    | -16.9  | GGGTGCAGATGCAGTGTGGCTCT     |
| 326 | hsa_miR_4640_5p | -16    | GGGTGCAGATGCAGTGTGGCTCT     |
| 541 | hsa_miR_6756_5p | -17    | GGGTGCAGATGCAGTGTGGCTCT     |
| 192 | hsa_miR_33b_3p  | -21.6  | GGGTGCAGATGCAGTGTGGCTCTG    |
| 491 | hsa_miR_6500_5p | -19.7  | GGGTGCAGATGCAGTGTGGCTCTG    |
| 526 | hsa_miR_6743_5p | -12.2  | GGGTGCAGATGCAGTGTGGCTCTG    |
| 350 | hsa_miR_431_3p  | -16.8  | GGGTGCAGATGCAGTGTGGCTCTG    |
| 55  | hsa_miR_1295a   | -14.7  | GGGTGCAGATGCAGTGTGGCTCTGG   |
| 538 | hsa_miR_6754_5p | -14.7  | GGGTGCAGATGCAGTGTGGCTCTGG   |
| 648 | hsa_miR_764     | -13.1  | GGGTGCAGATGCAGTGTGGCTCTGG   |
| 663 | hsa_miR_8074    | -19.9  | GGGTGCAGATGCAGTGTGGCTCTGG   |
| 665 | hsa_miR_8078    | -16.2  | GGGTGCAGATGCAGTGTGGCTCTGGAT |
| 117 | hsa_miR_212_3p  | -13.3  | GGTAAGGACATGAAGACAGTTC      |
| 383 | hsa_miR_4782_3p | -16.3  | GGTAAGGACATGAAGACAGTTC      |
| 367 | hsa_miR_4741    | -13    | GGTAAGGACATGAAGACAGTTCC     |
| 28  | hsa_miR_1204    | -12.4  | GGTATGGAGAGTCGGCTTGA        |
| 329 | hsa_miR_4650_5p | -15.5  | GGTATGGAGAGTCGGCTTGA        |
| 200 | hsa_miR_3617_3p | -16.9  | GGTATGGTGCTGGGTGCAGATG      |
| 353 | hsa_miR_4711_5p | -14.9  | GGTATGGTGCTGGGTGCAGATGCA    |

|     |                 |       |                             |
|-----|-----------------|-------|-----------------------------|
| 573 | hsa_miR_6805_3p | -21.7 | GGTATGGTGCTGGGTGCAGATGCAG   |
| 637 | hsa_miR_6089    | -15.9 | CAGCTTACTGCTTGAAAGGGTCTTG   |
| 750 | hsa_miR_6762_5p | -16.3 | CAGCTTACTGCTTGAAAGGGTCTTG   |
| 497 | hsa_miR_4750_5p | -15.4 | CATGCAGCTTACTGCTTGAA        |
| 189 | hsa_miR_30a_3p  | -12.1 | CATGCAGCTTACTGCTTGAAAG      |
| 182 | hsa_miR_297     | -13.2 | CCACAACAAGCAAGCATGCAG       |
| 600 | hsa_miR_5589_5p | -18.6 | CCACAACAAGCAAGCATGCAGCT     |
| 611 | hsa_miR_574_5p  | -15.9 | CCACAACAAGCAAGCATGCAGCTTA   |
| 127 | hsa_miR_23b_3p  | -12.9 | GGTGCAGATGCAGTGTGGC         |
| 673 | hsa_miR_891a_3p | -12.9 | GGTGCAGATGCAGTGTGGCT        |
| 297 | hsa_miR_449b_3p | -18   | GGTGCAGATGCAGTGTGGCTC       |
| 137 | hsa_miR_27a_5p  | -16.8 | GGTGCAGATGCAGTGTGGCTCT      |
| 385 | hsa_miR_4786_5p | -19.2 | GGTGCAGATGCAGTGTGGCTCT      |
| 498 | hsa_miR_6508_3p | -14.9 | GGTGCAGATGCAGTGTGGCTCT      |
| 321 | hsa_miR_4632_5p | -12.4 | GGTGCAGATGCAGTGTGGCTCTG     |
| 377 | hsa_miR_4761_3p | -15.3 | GGTGCAGATGCAGTGTGGCTCTG     |
| 465 | hsa_miR_6081    | -19   | GGTGCAGATGCAGTGTGGCTCTG     |
| 474 | hsa_miR_615_5p  | -14   | GGTGCAGATGCAGTGTGGCTCTG     |
| 642 | hsa_miR_7160_3p | -16.9 | GGTGCAGATGCAGTGTGGCTCTG     |
| 181 | hsa_miR_3187_5p | -14   | GGTGCAGATGCAGTGTGGCTCTGG    |
| 492 | hsa_miR_6501_3p | -20.7 | GGTGCAGATGCAGTGTGGCTCTGG    |
| 666 | hsa_miR_8081    | -14.2 | GGTGCAGATGCAGTGTGGCTCTGG    |
| 73  | hsa_miR_1469    | -16.9 | GGTGCAGATGCAGTGTGGCTCTGGA   |
| 87  | hsa_miR_139_5p  | -12.7 | GGTGCAGATGCAGTGTGGCTCTGGA   |
| 143 | hsa_miR_297     | -15   | GGTGCTGGGTGCAGATGCAG        |
| 585 | hsa_miR_6818_5p | -13.9 | GGTGCTGGGTGCAGATGCAG        |
| 312 | hsa_miR_4526    | -12.6 | GGTGCTGGGTGCAGATGCAGT       |
| 365 | hsa_miR_4734    | -24.3 | GGTGCTGGGTGCAGATGCAGT       |
| 120 | hsa_miR_217     | -13.7 | GGTGCTGGGTGCAGATGCAGTG      |
| 210 | hsa_miR_3650    | -13.1 | GGTGCTGGGTGCAGATGCAGTG      |
| 216 | hsa_miR_3664_5p | -12   | GGTGCTGGGTGCAGATGCAGTG      |
| 677 | hsa_miR_892c_3p | -12.6 | GGTGCTGGGTGCAGATGCAGTG      |
| 681 | hsa_miR_92b_3p  | -20.8 | GGTGCTGGGTGCAGATGCAGTG      |
| 449 | hsa_miR_4676_3p | -12.2 | GGTGCTGGGTGCAGATGCAGTG      |
| 99  | hsa_miR_1915_5p | -19.4 | GGTGCTGGGTGCAGATGCAGTGT     |
| 348 | hsa_miR_4693_5p | -12.2 | GGTGCTGGGTGCAGATGCAGTGT     |
| 486 | hsa_miR_643     | -12.1 | GGTGCTGGGTGCAGATGCAGTGT     |
| 339 | hsa_miR_4675    | -17.7 | GGTGCTGGGTGCAGATGCAGTGTG    |
| 510 | hsa_miR_6720_3p | -15.5 | GGTGCTGGGTGCAGATGCAGTGTG    |
| 101 | hsa_miR_195_3p  | -17.3 | GGTGCTGGGTGCAGATGCAGTGTGG   |
| 122 | hsa_miR_221_3p  | -20.7 | GGTGCTGGGTGCAGATGCAGTGTGGCT |
| 582 | hsa_miR_6816_5p | -13.8 | GTAAGGACATGAAGACAGTTCCT     |
| 251 | hsa_miR_424_5p  | -12.2 | GTAAGGACATGAAGACAGTTCCTG    |
| 658 | hsa_miR_8059    | -13   | GTAAGGACATGAAGACAGTTCCTG    |
| 215 | hsa_miR_3139    | -13   | GTAAGGACATGAAGACAGTTCCTG    |
| 30  | hsa_miR_1207_3p | -14.8 | GTATGGAGAGTCGGCTTGA         |
| 389 | hsa_miR_4793_5p | -16.1 | GTATGGTGCTGGGTGCAGATGC      |

|     |                 |        |                           |
|-----|-----------------|--------|---------------------------|
| 624 | hsa_miR_6895_3p | -15.7  | GTATGGTGCTGGGTGCAGATGCA   |
| 102 | hsa_miR_1587    | -19.8  | CCTCACCCAAGCTAGAGTGCAG    |
| 387 | hsa_miR_4792    | -13.2  | GTCGGCTTGACTACTG          |
| 37  | hsa_miR_1250_5p | -13    | GTCGGCTTGACTACTGT         |
| 346 | hsa_miR_4302    | -14.8  | GTCGGCTTGACTACTGT         |
| 135 | hsa_miR_2682_5p | -14.4  | GTCGGCTTGACTACTGTGTG      |
| 550 | hsa_miR_6768_5p | -16.6  | GTCGGCTTGACTACTGTGTG      |
| 912 | hsa_miR_8064    | -19.2  | GTCGGCTTGACTACTGTGTG      |
| 347 | hsa_miR_4692    | -17.92 | GTCGGCTTGACTACTGTGTGG     |
| 900 | hsa_miR_7703    | -20.16 | CCTCACCCAAGCTAGAGTGCAG    |
| 150 | hsa_miR_221_3p  | -13.5  | CTCACCCAAGCTAGAGTGCAGTG   |
| 793 | hsa_miR_6807_3p | -25.8  | CTCACCCAAGCTAGAGTGCAGTG   |
| 867 | hsa_miR_7108_5p | -16.3  | CTGCTTGAAAGGGTCTTGCCTCAC  |
| 440 | hsa_miR_4661_3p | -15.9  | CTTACTGCTTGAAAGGGTCTTG    |
| 866 | hsa_miR_7108_5p | -15.1  | CTTACTGCTTGAAAGGGTCTTGC   |
| 289 | hsa_miR_4482_5p | -13.4  | GTGAGGTATGGTGTGGGTG       |
| 552 | hsa_miR_6773_5p | -14.3  | GTGAGGTATGGTGTGGGTGCAG    |
| 384 | hsa_miR_4784    | -14.3  | GTGATCCTCAGCTCCCA         |
| 570 | hsa_miR_6799_5p | -16.7  | GTGATCCTCAGCTCCCA         |
| 612 | hsa_miR_6870_5p | -18.8  | GTGATCCTCAGCTCCCA         |
| 261 | hsa_miR_4298    | -20.4  | GTGATCCTCAGCTCCCAG        |
| 555 | hsa_miR_6779_5p | -23.4  | GTGATCCTCAGCTCCCAG        |
| 113 | hsa_miR_204_3p  | -21.2  | GTGATCCTCAGCTCCCAGT       |
| 115 | hsa_miR_211_3p  | -12.3  | GTGATCCTCAGCTCCCAGT       |
| 84  | hsa_miR_181d_3p | -18.9  | GTGATCCTCAGCTCCCAGTGG     |
| 123 | hsa_miR_222_3p  | -14.1  | GTGCAGATGCAGTGTGGCT       |
| 246 | hsa_miR_409_5p  | -14.3  | GTGCAGATGCAGTGTGGCTC      |
| 370 | hsa_miR_4743_5p | -13.1  | GTGCAGATGCAGTGTGGCTC      |
| 527 | hsa_miR_6744_3p | -17.8  | GTGCAGATGCAGTGTGGCTC      |
| 291 | hsa_miR_4487    | -14.9  | GTGCAGATGCAGTGTGGCTCT     |
| 295 | hsa_miR_4498    | -14.1  | GTGCAGATGCAGTGTGGCTCT     |
| 470 | hsa_miR_610     | -14.4  | GTGCAGATGCAGTGTGGCTCT     |
| 307 | hsa_miR_4512    | -26.2  | GTGCAGATGCAGTGTGGCTCTG    |
| 403 | hsa_miR_503_5p  | -13.5  | GTGCAGATGCAGTGTGGCTCTG    |
| 490 | hsa_miR_650     | -12    | GTGCAGATGCAGTGTGGCTCTG    |
| 545 | hsa_miR_6762_5p | -22.9  | GTGCAGATGCAGTGTGGCTCTG    |
| 14  | hsa_miR_105_3p  | -12.3  | GTGCAGATGCAGTGTGGCTCTGG   |
| 426 | hsa_miR_520g_5p | -19.7  | GTGCAGATGCAGTGTGGCTCTGGA  |
| 685 | hsa_miR_939_3p  | -16.1  | GTGCAGATGCAGTGTGGCTCTGGA  |
| 304 | hsa_miR_450a_1_ | -14    | GTGCAGATGCAGTGTGGCTCTGGAT |
| 561 | hsa_miR_6783_3p | -17    | GTGCAGATGCAGTGTGGCTCTGGAT |
| 34  | hsa_miR_1231    | -15.7  | GTGCTGGGTGCAGATGC         |
| 269 | hsa_miR_4325    | -14.6  | GTGCTGGGTGCAGATGCAG       |
| 161 | hsa_miR_3130_3p | -14.3  | GTGCTGGGTGCAGATGCAGT      |
| 580 | hsa_miR_6814_3p | -15.4  | GTGCTGGGTGCAGATGCAGT      |
| 63  | hsa_miR_130a_3p | -12.4  | GTGCTGGGTGCAGATGCAGTG     |
| 272 | hsa_miR_4418    | -22.3  | GTGCTGGGTGCAGATGCAGTG     |

|     |                 |       |                             |
|-----|-----------------|-------|-----------------------------|
| 619 | hsa_miR_6890_3p | -19.9 | GTGCTGGGTGCAGATGCAGTGT      |
| 52  | hsa_miR_1288_3p | -13.3 | GTGCTGGGTGCAGATGCAGTGTG     |
| 441 | hsa_miR_5580_3p | -17.2 | GTGCTGGGTGCAGATGCAGTGTG     |
| 571 | hsa_miR_6804_3p | -22.9 | GTGCTGGGTGCAGATGCAGTGTG     |
| 16  | hsa_miR_106b_3p | -22   | GTGCTGGGTGCAGATGCAGTGTGG    |
| 294 | hsa_miR_4494    | -20.8 | GTGCTGGGTGCAGATGCAGTGTGG    |
| 549 | hsa_miR_6767_3p | -17.1 | GTGCTGGGTGCAGATGCAGTGTGG    |
| 622 | hsa_miR_6893_3p | -15.3 | GTGCTGGGTGCAGATGCAGTGTGG    |
| 499 | hsa_miR_6509_3p | -13.4 | GTGCTGGGTGCAGATGCAGTGTGGC   |
| 90  | hsa_miR_187_5p  | -18.9 | GTGCTGGGTGCAGATGCAGTGTGGCT  |
| 509 | hsa_miR_668_3p  | -18.6 | GTGCTGGGTGCAGATGCAGTGTGGCT  |
| 530 | hsa_miR_6746_3p | -18.8 | GTGCTGGGTGCAGATGCAGTGTGGCTC |
| 404 | hsa_miR_504_3p  | -13.9 | GTGGCTCTGGATAGCACCTT        |
| 65  | hsa_miR_1343_5p | -12.6 | GTGGCTCTGGATAGCACCTTA       |
| 194 | hsa_miR_342_5p  | -19.2 | GTGGCTCTGGATAGCACCTTA       |
| 366 | hsa_miR_4735_3p | -12.8 | GTGGCTCTGGATAGCACCTTA       |
| 332 | hsa_miR_4658    | -14.6 | GTGGCTCTGGATAGCACCTTAT      |
| 170 | hsa_miR_3154    | -13.4 | GTGGCTCTGGATAGCACCTTATG     |
| 620 | hsa_miR_6890_5p | -14.7 | GTGGCTCTGGATAGCACCTTATG     |
| 343 | hsa_miR_4687_3p | -15.1 | GTGTGGCTCTGGATAGCACCT       |
| 647 | hsa_miR_762     | -24.9 | GTGTGGCTCTGGATAGCACCT       |
| 165 | hsa_miR_3139    | -15.9 | GTGTGGCTCTGGATAGCACCTT      |
| 342 | hsa_miR_4678    | -15.3 | GTGTGGCTCTGGATAGCACCTT      |
| 551 | hsa_miR_6772_5p | -19.7 | GTGTGGCTCTGGATAGCACCTT      |
| 91  | hsa_miR_18a_5p  | -21.7 | GTGTGGCTCTGGATAGCACCTTA     |
| 598 | hsa_miR_6842_5p | -16.7 | GTGTGGCTCTGGATAGCACCTTA     |
| 600 | hsa_miR_6846_5p | -15.4 | GTGTGGCTCTGGATAGCACCTTA     |
| 79  | hsa_miR_154_5p  | -15.3 | GTTTTTATCCATGGATGACTTG      |
| 145 | hsa_miR_302d_3p | -12.7 | GTTTTTATCCATGGATGACTTG      |
| 75  | hsa_miR_148a_5p | -12.1 | TAAAACAGTGTCTCCAATTTT       |
| 536 | hsa_miR_5007_5p | -12.1 | TAACCAATGATGTAATGATTCTG     |
| 107 | hsa_miR_199a_3p | -17.2 | TAACCAATGATGTAATGATTCTGC    |
| 109 | hsa_miR_199b_3p | -17.2 | TAACCAATGATGTAATGATTCTGC    |
| 74  | hsa_miR_147b    | -13.1 | TAACTCAAGCCATTGGCACAC       |
| 627 | hsa_miR_7108_5p | -16.2 | TAACTCAAGCCATTGGCACACAG     |
| 505 | hsa_miR_661     | -20.8 | TAACTCAAGCCATTGGCACACAGGCA  |
| 235 | hsa_miR_3180    | -13.6 | CTTGAAAGGGTCTTGCCCTCA       |
| 379 | hsa_miR_4474_3p | -16.5 | CTTGCCTCACCAAGCTAGAG        |
| 69  | hsa_miR_1293    | -13.5 | GAAAGGGTCTTGCCTCACCCA       |
| 761 | hsa_miR_6772_5p | -21.8 | GAAAGGGTCTTGCCTCACCCA       |
| 157 | hsa_miR_3126_3p | -19.3 | TATGGTGCTGGGTGCAGATG        |
| 632 | hsa_miR_7112_3p | -17.3 | TATGGTGCTGGGTGCAGATGCA      |
| 653 | hsa_miR_7703    | -15.7 | TATGGTGCTGGGTGCAGATGCAG     |
| 380 | hsa_miR_4769_3p | -12.1 | TATGGTGCTGGGTGCAGATGCAGT    |
| 381 | hsa_miR_4772_3p | -13.2 | TATGGTGCTGGGTGCAGATGCAGT    |
| 519 | hsa_miR_6737_3p | -16.4 | TATGGTGCTGGGTGCAGATGCAGT    |
| 606 | hsa_miR_6861_5p | -13   | TATGGTGCTGGGTGCAGATGCAGT    |



|     |                 |        |                            |
|-----|-----------------|--------|----------------------------|
| 507 | hsa_miR_664a_3p | -15.7  | TATGGTGCTGGGTGCAGATGCAGTG  |
| 553 | hsa_miR_6776_5p | -14.1  | TCAAGCCATTGGCACACAGG       |
| 566 | hsa_miR_6788_5p | -15.8  | TCAAGTGATCCTCAGCTCCCAG     |
| 734 | hsa_miR_6751_5p | -16.5  | TCAAGTGATCCTCAGCTCCCAG     |
| 636 | hsa_miR_7114_5p | -13.9  | TCAAGTGATCCTCAGCTCCCAGT    |
| 254 | hsa_miR_4259    | -16    | TCAAGTGATCCTCAGCTCCCAGTG   |
| 710 | hsa_miR_6736_5p | -17.9  | GAAAGGGTCTTGCCTCACCCAA     |
| 812 | hsa_miR_6821_5p | -13.8  | GACCACAACAAGCAAGCATGCAG    |
| 515 | hsa_miR_4792    | -18.4  | GCAAGCATGCAGCTTACTG        |
| 391 | hsa_miR_449a    | -16.3  | GCAAGCATGCAGCTTACTGCTT     |
| 270 | hsa_miR_3619_5p | -20.3  | GCAAGCATGCAGCTTACTGCTTGA   |
| 193 | hsa_miR_30d_3p  | -16.4  | GCAGCTTACTGCTTGAAAG        |
| 655 | hsa_miR_630     | -14.7  | GCCTCACCCAAGCTAGAGTGCA     |
| 256 | hsa_miR_33b_5p  | -13.4  | TCAGTGTAACCAATGATGTAA      |
| 663 | hsa_miR_639     | -12    | TCAGTGTAACCAATGATGTAATGAT  |
| 118 | hsa_miR_215_3p  | -14.2  | TCATGATTGAAGAAATGCAGG      |
| 460 | hsa_miR_6068    | -14.6  | TCATGATTGAAGAAATGCAGG      |
| 371 | hsa_miR_4746_3p | -18.3  | TCGGCTTGACTACACTGTG        |
| 19  | hsa_miR_106b_3p | -19.2  | TCGGCTTGACTACACTGTGTGG     |
| 435 | hsa_miR_4656    | -20.7  | TCTGGGCTCAAGTGATCCTCAGCCTC |
| 455 | hsa_miR_4687_3p | -13    | GCTTACTGCTTGAAAGGGTCT      |
| 909 | hsa_miR_8052    | -17.9  | GCTTACTGCTTGAAAGGGTCTTG    |
| 860 | hsa_miR_6893_5p | -14.02 | GCTTGAAAGGGTCTTGCCTC       |
| 305 | hsa_miR_3689d   | -14.5  | GCTTGAAAGGGTCTTGCCTCACC    |
| 247 | hsa_miR_328_5p  | -22.8  | GCTTGAAAGGGTCTTGCCTCACCC   |
| 559 | hsa_miR_518e_5p | -13.3  | GGGTCTTGCCTCACCCAAGCTAGAG  |
| 567 | hsa_miR_519a_5p | -13.3  | GGGTCTTGCCTCACCCAAGCTAGAG  |
| 569 | hsa_miR_519b_5p | -13.3  | GGGTCTTGCCTCACCCAAGCTAGAG  |
| 571 | hsa_miR_519c_5p | -13.3  | GGGTCTTGCCTCACCCAAGCTAGAG  |
| 275 | hsa_miR_4430    | -19.4  | TGAAGCTTACTACAGCCT         |
| 503 | hsa_miR_656_5p  | -12.5  | TGAAGCTTACTACAGCCT         |
| 9   | hsa_let_7i_5p   | -17.2  | TGAAGCTTACTACAGCCTCA       |
| 452 | hsa_miR_574_5p  | -13    | TGAAGCTTACTACAGCCTCA       |
| 572 | hsa_miR_6804_5p | -14.1  | TGAAGCTTACTACAGCCTCA       |
| 678 | hsa_miR_920     | -16.9  | TGAAGCTTACTACAGCCTCA       |
| 81  | hsa_miR_1587    | -13.4  | TGAAGCTTACTACAGCCTCAA      |
| 523 | hsa_miR_6741_5p | -14.2  | TGAAGCTTACTACAGCCTCAA      |
| 603 | hsa_miR_6857_5p | -12.4  | TGAAGCTTACTACAGCCTCAA      |
| 60  | hsa_miR_1304_5p | -18.5  | TGAAGCTTACTACAGCCTCAAA     |
| 576 | hsa_miR_522_5p  | -13.3  | GGGTCTTGCCTCACCCAAGCTAGAG  |
| 578 | hsa_miR_523_5p  | -13.3  | GGGTCTTGCCTCACCCAAGCTAGAG  |
| 447 | hsa_miR_5691    | -14.3  | TGAGGTATGGTGCTGGGTGCAG     |
| 164 | hsa_miR_3137    | -15    | TGAGGTATGGTGCTGGGTGCAGA    |
| 213 | hsa_miR_3656    | -14.3  | TGATCCTCAGCCTCCC           |
| 231 | hsa_miR_3178    | -14.8  | TGATCCTCAGCCTCCC           |
| 360 | hsa_miR_4727_3p | -17.2  | TGATCCTCAGCCTCCCAGTGG      |
| 112 | hsa_miR_202_3p  | -12.3  | TGCAGATGCAGTGTGGCTCT       |

|     |                 |        |                             |
|-----|-----------------|--------|-----------------------------|
| 219 | hsa_miR_3670    | -17    | TGCAGATGCAGTGTGGCTCT        |
| 83  | hsa_miR_15a_5p  | -12.1  | TGCAGATGCAGTGTGGCTCTG       |
| 322 | hsa_miR_4633_3p | -18.2  | TGCAGATGCAGTGTGGCTCTG       |
| 400 | hsa_miR_5007_5p | -12.5  | TGCAGATGCAGTGTGGCTCTG       |
| 411 | hsa_miR_5090    | -14.7  | TGCAGATGCAGTGTGGCTCTGG      |
| 396 | hsa_miR_498     | -16    | TGCAGATGCAGTGTGGCTCTGGAT    |
| 590 | hsa_miR_5572    | -14.9  | GGTCTTGCCTCACCCAAGC         |
| 303 | hsa_miR_4508    | -14.8  | TGCAGTGTGGCTCTGG            |
| 191 | hsa_miR_33a_5p  | -20.3  | TGCAGTGTGGCTCTGGATAGCAC     |
| 397 | hsa_miR_5001_5p | -19.2  | TGCAGTGTGGCTCTGGATAGCACCT   |
| 424 | hsa_miR_4633_3p | -21.8  | TGCAGTGTGGCTCTGGATAGCACCT   |
| 485 | hsa_miR_4741    | -21.52 | TGCAGTGTGGCTCTGGATAGCACCT   |
| 344 | hsa_miR_4688    | -14.7  | TGCAGTGTGGCTCTGGATAGCACCTTA |
| 716 | hsa_miR_6740_5p | -16.5  | GGTCTTGCCTCACCCAAGCT        |
| 565 | hsa_miR_5195_3p | -12.1  | GGTCTTGCCTCACCCAAGCTAGAG    |
| 697 | hsa_miR_6720_5p | -14    | GGTCTTGCCTCACCCAAGCTAGAG    |
| 233 | hsa_miR_378j    | -17.4  | TGCTGGGTGCAGATGCAGT         |
| 58  | hsa_miR_1301_5p | -19.7  | TGCTGGGTGCAGATGCAGTG        |
| 154 | hsa_miR_3120_3p | -14.1  | TGCTGGGTGCAGATGCAGTG        |
| 267 | hsa_miR_4318    | -14    | TGCTGGGTGCAGATGCAGTG        |
| 357 | hsa_miR_4718    | -17.7  | TGCTGGGTGCAGATGCAGTG        |
| 597 | hsa_miR_6841_3p | -24.1  | TGCTGGGTGCAGATGCAGTGT       |
| 177 | hsa_miR_3177_3p | -13.1  | TGCTGGGTGCAGATGCAGTGTG      |
| 3   | hsa_let_7d_3p   | -14    | TGCTGGGTGCAGATGCAGTGTGG     |
| 654 | hsa_miR_7848_3p | -16.4  | TGCTGGGTGCAGATGCAGTGTGG     |
| 184 | hsa_miR_3197    | -15.5  | TGCTGGGTGCAGATGCAGTGTGGCTCT |
| 614 | hsa_miR_5787    | -17.6  | GTCTTGCCTCACCCAAGCTA        |
| 498 | hsa_miR_4750_5p | -14    | GTCTTGCCTCACCCAAGCTAGAG     |
| 689 | hsa_miR_663a    | -18.5  | TACTGCTTCAAAGGGTCTTGCCT     |
| 356 | hsa_miR_4325    | -12.6  | TCACCCAAGCTAGAGTGCAG        |
| 209 | hsa_miR_3130_3p | -20.1  | TCACCCAAGCTAGAGTGCAGT       |
| 260 | hsa_miR_345_5p  | -15.2  | TCACCCAAGCTAGAGTGCAGT       |
| 166 | hsa_miR_25_3p   | -16.9  | TCACCCAAGCTAGAGTGCAGTG      |
| 401 | hsa_miR_4507    | -20.9  | TCTTGCCTCACCCAAGCTAG        |
| 753 | hsa_miR_6765_3p | -12.1  | TCTTGCCTCACCCAAGCTAGAGTGC   |
| 257 | hsa_miR_33b_5p  | -15.7  | TGACCACAACAAGCAAGCAT        |
| 639 | hsa_miR_7152_5p | -12.9  | TGCTTGGGTAAGGACATGAAG       |
| 257 | hsa_miR_4268    | -13.6  | TGGAAGTTGAAATGGTGGAGTC      |
| 54  | hsa_miR_1293    | -12.7  | TGGAGAGTCGGCTTGACTACTG      |
| 146 | hsa_miR_3064_5p | -18    | TGGCACACAGGCATTAGACAGA      |
| 495 | hsa_miR_6504_5p | -12.8  | TGGCACACAGGCATTAGACAGA      |
| 200 | hsa_miR_3120_5p | -21.3  | TGGCACACAGGCATTAGACAGA      |
| 283 | hsa_miR_3650    | -17.2  | TGGCTCTGGATAGCACCT          |
| 178 | hsa_miR_3178    | -14.2  | TGGCTCTGGATAGCACCTT         |
| 590 | hsa_miR_6829_5p | -14.9  | TGGCTCTGGATAGCACCTT         |
| 722 | hsa_miR_6743_5p | -12.4  | TGGCTCTGGATAGCACCTT         |
| 23  | hsa_miR_1178_5p | -16.3  | TGGGCTCAAGTGATCCTC          |

|     |                 |        |                             |
|-----|-----------------|--------|-----------------------------|
| 62  | hsa_miR_1286    | -12.3  | TGGGCTCAAGTGATCCTCA         |
| 364 | hsa_miR_4731_5p | -23.8  | TGGGCTCAAGTGATCCTCAGCC      |
| 445 | hsa_miR_5589_5p | -18.3  | TGGGCTCAAGTGATCCTCAGCC      |
| 516 | hsa_miR_6729_5p | -21    | TGGGCTCAAGTGATCCTCAGCCTC    |
| 447 | hsa_miR_4675    | -16.2  | TGGGCTCAAGTGATCCTCAGCCTC    |
| 341 | hsa_miR_4677_5p | -12.8  | TGGGTAAGGACATGAAGACAG       |
| 489 | hsa_miR_4746_3p | -15.5  | TGGGTGCAGATGCAGTGTG         |
| 59  | hsa_miR_1304_3p | -16.1  | TGGGTGCAGATGCAGTGTGG        |
| 206 | hsa_miR_3622b_3 | -13.5  | TGGGTGCAGATGCAGTGTGG        |
| 392 | hsa_miR_485_3p  | -14    | TGGGTGCAGATGCAGTGTGGC       |
| 407 | hsa_miR_505_3p  | -12.9  | TGGGTGCAGATGCAGTGTGGCT      |
| 525 | hsa_miR_6743_3p | -19.3  | TGGGTGCAGATGCAGTGTGGCT      |
| 624 | hsa_miR_6069    | -19.3  | TGGGTGCAGATGCAGTGTGGCTC     |
| 483 | hsa_miR_638     | -17.7  | TGGGTGCAGATGCAGTGTGGCTCT    |
| 53  | hsa_miR_1289    | -20    | TGGGTGCAGATGCAGTGTGGCTCTG   |
| 82  | hsa_miR_15a_3p  | -28.1  | TGGGTGCAGATGCAGTGTGGCTCTG   |
| 173 | hsa_miR_3158_3p | -15.6  | TGGGTGCAGATGCAGTGTGGCTCTG   |
| 350 | hsa_miR_4697_5p | -14.2  | TGGGTGCAGATGCAGTGTGGCTCTG   |
| 443 | hsa_miR_5586_3p | -13.6  | TGGGTGCAGATGCAGTGTGGCTCTG   |
| 106 | hsa_miR_1972    | -17.5  | TGGGTGCAGATGCAGTGTGGCTCTGG  |
| 432 | hsa_miR_4650_5p | -12.5  | TGGGTGCAGATGCAGTGTGGCTCTGG  |
| 413 | hsa_miR_5100    | -16.4  | TGGGTGCAGATGCAGTGTGGCTCTGGA |
| 480 | hsa_miR_632     | -14.8  | TGGTGCTGGGTGCAGATGC         |
| 133 | hsa_miR_25_3p   | -17.9  | TGGTGCTGGGTGCAGATGCAGTG     |
| 208 | hsa_miR_363_3p  | -14.4  | TGGTGCTGGGTGCAGATGCAGTG     |
| 675 | hsa_miR_892a    | -13.3  | TGGTGCTGGGTGCAGATGCAGTG     |
| 171 | hsa_miR_3156_5p | -13.7  | TGTCTCCAATTTTAATAAATTTTT    |
| 607 | hsa_miR_6862_3p | -17    | TGTGAGGTATGGTGCTGGGTGCAGA   |
| 467 | hsa_miR_6085    | -17.3  | TGTGGCTCTGGATAGCACCTT       |
| 17  | hsa_miR_106b_5p | -13.4  | TGTGGCTCTGGATAGCACCTTA      |
| 694 | hsa_miR_668_3p  | -13.3  | TGCCTCACCAAGCTAGAGTGCA      |
| 7   | hsa_let_7f_5p   | -12.2  | TGCTTGAAAGGGTCTTGCCTCA      |
| 233 | hsa_miR_3180_3p | -15.9  | TGCTTGAAAGGGTCTTGCCTCA      |
| 69  | hsa_miR_141_5p  | -13.8  | TTAGACAGAAAGCTGGAAGTTG      |
| 643 | hsa_miR_7160_5p | -15.8  | TTCTGGGCTCAAGTGATCCTCAGCC   |
| 242 | hsa_miR_3197    | -21.9  | TGCTTGAAAGGGTCTTGCCTCA      |
| 539 | hsa_miR_5008_5p | -18.1  | TTACTGCTTGAAAGGGTCTTG       |
| 699 | hsa_miR_6721_5p | -16.5  | TTACTGCTTGAAAGGGTCTTGCCTC   |
| 327 | hsa_miR_3975    | -13.3  | TTGAAAGGGTCTTGCCTCA         |
| 705 | hsa_miR_6729_5p | -15.6  | TTGAAAGGGTCTTGCCTCACCCA     |
| 708 | hsa_miR_6731_5p | -13.6  | TTGAAAGGGTCTTGCCTCACCCA     |
| 817 | hsa_miR_6825_5p | -17.1  | TTGAAAGGGTCTTGCCTCACCCA     |
| 245 | hsa_miR_3975    | -13.53 | TTGAAGCTTACTACAGCCTCA       |
| 186 | hsa_miR_3064_5p | -18.6  | TTGCCTCACCAAGCTAGA          |
| 521 | hsa_miR_6740_3p | -17.9  | TTGCTTGGGTAAGGACATGAAGACA   |
| 591 | hsa_miR_6830_3p | -13.1  | TTGCTTGGGTAAGGACATGAAGACA   |
| 464 | hsa_miR_6080    | -13.5  | TTGGCACACAGCATTAGA          |

|     |                 |       |                           |
|-----|-----------------|-------|---------------------------|
| 688 | hsa_miR_943     | -13.1 | TTGGCACACAGGCATTAGACAG    |
| 89  | hsa_miR_187_3p  | -14.9 | TTGGCACACAGGCATTAGACAGA   |
| 618 | hsa_miR_6888_3p | -12.5 | TTGGCACACAGGCATTAGACAGAA  |
| 369 | hsa_miR_4743_3p | -18.3 | TTGGCACACAGGCATTAGACAGAAA |
| 584 | hsa_miR_6818_3p | -12.3 | TTGGGTAAGGACATGAAGACAG    |
| 327 | hsa_miR_4646_3p | -14.8 | TTGGGTAAGGACATGAAGACAGT   |
| 712 | hsa_miR_6737_3p | -18.9 | TTGGGTAAGGACATGAAGACAGT   |
| 613 | hsa_miR_6876_3p | -18.5 | TTGGGTAAGGACATGAAGACAGTT  |
| 308 | hsa_miR_4513    | -12.1 | TTGGGTAAGGACATGAAGACAGTTC |
| 689 | hsa_miR_99a_3p  | -13.8 | TTTATCCATGGATGACTTG       |
| 690 | hsa_miR_99b_3p  | -13.3 | TTTATCCATGGATGACTTG       |
| 657 | hsa_miR_8052    | -15.4 | TTTGAAGCTTACTACAGCCTC     |
| 446 | hsa_miR_4675    | -13.4 | TTTGAAGCTTACTACAGCCTC     |
| 6   | hsa_let_7f_5p   | -13   | TTTGAAGCTTACTACAGCCTCA    |
| 8   | hsa_let_7g_5p   | -16.2 | TTTGAAGCTTACTACAGCCTCA    |
| 292 | hsa_miR_4489    | -14.4 | TTTGAAGCTTACTACAGCCTCA    |
| 630 | hsa_miR_7110_5p | -16   | TTTGAAGCTTACTACAGCCTCA    |
| 352 | hsa_miR_431_3p  | -13.9 | TTTTATCCATGGATGACTTG      |
| 124 | hsa_miR_195_3p  | -12.3 | TTTTCAGTGTAACCAATGATGT    |
| 215 | hsa_miR_3663_5p | -12.4 | TTTTTATCCATGGATGACTTGC    |

| miRNA sequence             | Number of | Length of h | P value |
|----------------------------|-----------|-------------|---------|
| CTGGGGAGATCCTCGAGGTTGG     | 17        | 23          | 0.35    |
| AGCTTCTTTACAGTGCTGCCTTG    | 18        | 24          | 0.275   |
| CGGGGCCGTAGCACTGTCTGAGA    | 14        | 23          | 0.275   |
| GCTATTTACGACACCAGGGTT      | 14        | 21          | 0.203   |
| CGGGGCCGTAGCACTGTCTGAGA    | 14        | 22          | 0.0648  |
| TGGCAGTTACTTTTGCACCAG      | 13        | 20          | 0.111   |
| ACGGGTTAGGCTCTTGGGAGCT     | 13        | 21          | 0.332   |
| CAGGCACGGGAGCTCAGGTGAG     | 15        | 22          | 0.0344  |
| CTCCTCTGTTTTCTTTCTAG       | 18        | 21          | 0.203   |
| CTGGGAGGTGTGATATCGTGGT     | 16        | 25          | 0.111   |
| TGAGGCAGTAGATTGAAT         | 12        | 16          | 0.0344  |
| ATTGGGGACATTTTGCATTCAT     | 12        | 22          | 0.0866  |
| GGGTGGGGATTTGTTGCATTAC     | 13        | 22          | 0.143   |
| GGTGAGGCTAGCTGGTG          | 12        | 18          | 0.0344  |
| TGGGGAAGGCTTGGCAGGGAAGA    | 13        | 24          | 0.143   |
| CATGGTTCTGTCAAGCACCGCG     | 16        | 21          | 0.332   |
| GGTGGTTGAGGCTGCAGTAAGT     | 16        | 22          | 0.143   |
| AGGCATGGGAGGTCAGGTGA       | 16        | 18          | 0.143   |
| TTGGGAGGGAAGACAGCTGGAGA    | 18        | 25          | 0.143   |
| CTGGGAGGTGTGATATCGTGGT     | 16        | 25          | 0.143   |
| CAGGCAGAAGTGGGGCTGACAGG    | 17        | 25          | 0.332   |
| CTGGGAGGTGTGATATTGTGGT     | 18        | 25          | 0.143   |
| CTGGGAGGTCAAGGCTGCAGT      | 15        | 20          | 0.143   |
| TTGGAGGCGTGGGTTTT          | 14        | 16          | 0.0866  |
| GGTGGGGGGTGTGTTTT          | 15        | 18          | 0.0866  |
| TTGGAATAGGGGATATCTCAGC     | 15        | 22          | 0.0866  |
| GGCTGAGTGGGGTTCTGACTCC     | 13        | 23          | 0.203   |
| TCGTATCAGAGATTCCAGACAC     | 14        | 20          | 0.203   |
| TGGGATGAGGGATTGAAGTGGA     | 12        | 20          | 0.0344  |
| AAAATGGTGCCTAGTGACTACA     | 12        | 23          | 0.0104  |
| AAGTTGGCTGCAGTTAAGGTGG     | 15        | 21          | 0.0344  |
| CCAGTGGGGCTGCTGTTATCTG     | 15        | 22          | 0.0344  |
| CGCAGGGGCCGGGTGCTCACCG     | 14        | 23          | 0.0344  |
| AGAAGTAATTGCGTTTTGCCA      | 17        | 23          | 0.0344  |
| AAGTAGTTGGTTTGTATGAGATGGTT | 20        | 24          | 0.0344  |
| TTCGGGCTGGCCTGCTGCTCCGG    | 12        | 24          | 0.332   |
| CGGGTAGAGAGGGCAGTGGGAGG    | 16        | 25          | 0.0344  |
| ACGGGCAGGGCAGTGCACCCTG     | 14        | 26          | 0.0344  |
| GAGGCAGAAGCAGGATGACA       | 14        | 21          | 0.0344  |
| GCAGGACAGGCAGAAGTGGAT      | 14        | 23          | 0.111   |
| GGGGGGATGTGCATGCTGGTT      | 17        | 24          | 0.111   |
| CGGCGGGGACGGCGATTGGTC      | 17        | 25          | 0.111   |
| TCGTACCGTGAGTAATAATGCG     | 16        | 21          | 0.284   |

|                          |    |    |        |
|--------------------------|----|----|--------|
| CGGGCATGCTGGGAGAGACTTT   | 18 | 25 | 0.284  |
| TGAGTGCCGGTGCCTGCCCTG    | 13 | 21 | 0.203  |
| TGGGGAGGTGTGGAGTCAGCAT   | 14 | 24 | 0.0866 |
| GTTGGGACAAGAGGACGGTCTT   | 15 | 23 | 0.0866 |
| TGGGCGTATCTGTATGCTA      | 16 | 21 | 0.0344 |
| TGGCAGTGTCTTAGCTGGTTGT   | 18 | 22 | 0.0344 |
| CAGCAGCACACTGTGTTTTGT    | 14 | 19 | 0.0344 |
| CGGGAGCTGGGGTCTGCAGGT    | 16 | 23 | 0.0344 |
| TTGCAGCTGCGGTTGTAAGGT    | 18 | 22 | 0.0344 |
| CTGGGTGAGGGCATCTGTGGT    | 14 | 22 | 0.0344 |
| TGCAGGACCAAGATGAGCCCT    | 12 | 21 | 0.0344 |
| GTGAGTAGTGCGCGCGGCGGC    | 18 | 25 | 0.0344 |
| TAGTGAGTTAGAGATGCAGAGCC  | 16 | 20 | 0.0344 |
| AGCAGAGGCAGAGAGGCTCAGG   | 13 | 22 | 0.0344 |
| AGGCAGCGGGGTGTAGTGGATA   | 14 | 23 | 0.0344 |
| AGCCTGTGCTTGTCCCTGCAG    | 13 | 20 | 0.203  |
| TAGAGTCTGGCTGATATGGTTT   | 17 | 23 | 0.203  |
| GGATGGTTGGGGGCGGTCGGCGT  | 15 | 23 | 0.203  |
| CGGTGGACTGGAGTGGGTGG     | 16 | 20 | 0.203  |
| CCAGTGACTGAGCTGGAGCCA    | 16 | 21 | 0.203  |
| ATCAGGGCTTGTGGAATGGGAAG  | 15 | 22 | 0.203  |
| AGTCATTGGAGGGTTTGTAGCAG  | 15 | 23 | 0.203  |
| TGAGCCGAGCTGAGCTTAGCTG   | 19 | 25 | 0.203  |
| CCCAGTGTTCCAGACTACCTGTTT | 16 | 23 | 0.203  |
| TTCGCCACTTCCCTCCCTGCAG   | 16 | 23 | 0.203  |
| GCTGCACCGGAGACTGGGTAA    | 15 | 25 | 0.203  |
| GGGGCCTGGCGGTGGGCGG      | 14 | 17 | 0.0648 |
| TGGGGCTCAGCGAGTTT        | 14 | 18 | 0.0648 |
| TGAGGTAGTAGTTTCTT        | 14 | 18 | 0.0648 |
| TAAGGGGTGTATGGCAGATGCA   | 14 | 24 | 0.0344 |
| CAGGGAGGCGCTCACTCTGCT    | 17 | 24 | 0.0344 |
| TGGGCAGGGGCTTATTGTAGGAG  | 14 | 24 | 0.0344 |
| AGACCCTGGTCTGCACTCTATC   | 12 | 22 | 0.0344 |
| TGAGACCTCTGGGTTCTGAGCT   | 18 | 24 | 0.0344 |
| CTTGGGGCATGGAGTCCCA      | 13 | 20 | 0.0344 |
| GGTGGGGCAATGGGATCAGGT    | 14 | 19 | 0.143  |
| TGGGGGAGTGCAGTGATTGTGG   | 14 | 20 | 0.143  |
| GTTGGGACAAGAGGACGGTCTT   | 14 | 22 | 0.143  |
| TCTGAGAGAGCTCGATGGCAG    | 14 | 22 | 0.143  |
| ACTGGGTAGGTGGGGCTCCAGG   | 16 | 22 | 0.143  |
| TGAGGCTCTGTTAGCCTTGGCTC  | 14 | 21 | 0.203  |
| AGCTCGGTCTGAGGCCCTCAGT   | 12 | 22 | 0.0344 |
| CTGGCGGAGCCCATTCATGCCA   | 15 | 22 | 0.111  |
| GAGCTTGATGAGCTGGGCTGA    | 17 | 23 | 0.0344 |
| TCTGGATTGAAGAGACGCCA     | 16 | 25 | 0.0344 |
| TGGAGAGAAAGGCAGTTCCTGA   | 18 | 23 | 0.0104 |
| TTGGGGGTGAGGTTGGTGTCTGG  | 18 | 24 | 0.0104 |

|                           |    |    |        |
|---------------------------|----|----|--------|
| GCGGAAGGCGGAGCGGCGGA      | 13 | 19 | 0.0344 |
| CAGGGAGAAGGTGGAAGTGCAGA   | 15 | 22 | 0.0344 |
| ATTAGGTAGTGGCAGTGG AAC    | 15 | 24 | 0.0344 |
| TCCCTGTCCTCCAGGAGCTCACG   | 16 | 25 | 0.0344 |
| TTCAGCCAGGCTAGTGCAGTCT    | 16 | 26 | 0.203  |
| TCATAGCCCTGTACAATGCTGCT   | 16 | 24 | 0.203  |
| TTCCAGCCCTTCTAATGGTAGG    | 17 | 25 | 0.203  |
| TTCCAGCCCTGGTAGGCGCCGCG   | 16 | 25 | 0.203  |
| GGCGGAGGGAAGTAGGTCCGTTGGT | 18 | 23 | 0.111  |
| TGGCAGTGTATTGTTAGCTGGT    | 18 | 24 | 0.111  |
| TGGGAGAGCAGGGTATTGTGGA    | 16 | 24 | 0.111  |
| TCAGTGCATGACAGAACTTGG     | 14 | 19 | 0.0344 |
| TGTCTGCTGGGGTTTCT         | 14 | 21 | 0.0344 |
| ACTGGGCAGGGCTGTGGTGAGT    | 16 | 23 | 0.0344 |
| TGCAGCTCTGGTGAAAATGGAG    | 14 | 20 | 0.0344 |
| CTGAACTAGAGATTGGGCCCA     | 13 | 21 | 0.0344 |
| AGTCATTGGAGGGTTT GAGCAG   | 16 | 22 | 0.284  |
| TTGTGTCAATATGCGATGATGT    | 16 | 19 | 0.203  |
| CTGTGGGCTCAGCGCTGGGG      | 16 | 21 | 0.203  |
| CGCTTTGCTCAGCCAGTGTAG     | 17 | 23 | 0.0344 |
| GTGTGACCACCGTTCCTGCAG     | 14 | 19 | 0.0344 |
| CGCGCGGCCGTGCTCGGAGCAG    | 16 | 20 | 0.0344 |
| CGCAGGGCCCTGGCGCAGGCAT    | 16 | 20 | 0.0344 |
| TGGCAGGGAGGCTGGGAGGGG     | 14 | 21 | 0.0344 |
| CAGGTAGATATTTGATAGGCAT    | 17 | 22 | 0.0344 |
| TGGGGTAAGGATAGGAGGGTCA    | 14 | 23 | 0.0344 |
| CATTACAGCACAGCCATTCT      | 16 | 21 | 0.203  |
| TCCATGTTTCCTTCCCCCTTCT    | 20 | 26 | 0.203  |
| CCTGCAGCGACTTGATGGCTTCC   | 15 | 26 | 0.35   |
| AGGTGTGTCTGTAGAGTCC       | 14 | 21 | 0.332  |
| TACAGATGCAGATTCTCTGACTTC  | 16 | 23 | 0.332  |
| ACACAGTGCTTCATCCACTACT    | 18 | 24 | 0.332  |
| ATCGCTGCGGTTGCGAGCGCTGT   | 19 | 27 | 0.332  |
| ACAGGGCCGCAGATGGAGACT     | 15 | 19 | 0.0778 |
| GTTAGGGCCAACATCTCTTGG     | 12 | 20 | 0.0778 |
| CTCCAGAGGGATGCACTTTCT     | 16 | 21 | 0.0778 |
| TGTCGTGGGGCTTGCTGGCTTG    | 16 | 22 | 0.0778 |
| TATGTAGTAGTCAAAGGCATTT    | 17 | 22 | 0.0778 |
| GTGGGTACGGCCAGTGGGGGG     | 18 | 24 | 0.0344 |
| GTGAGGAGGGGCTGGCAGGGAC    | 14 | 24 | 0.0344 |
| GGGACCCAGGGAGAGACGTAAG    | 15 | 21 | 0.0344 |
| CAGGATGTGGTCAAGTGTTGTT    | 13 | 22 | 0.0344 |
| CAGGGCCAGGCACAGAGTAAG     | 17 | 22 | 0.0344 |
| GCGAGGACCCCTCGGGGTCTGAC   | 14 | 23 | 0.0344 |
| GGTGGGCTTCCCGAGGG         | 13 | 22 | 0.0344 |
| AGTGGGGTGGGACCCAGCTGTT    | 12 | 22 | 0.0344 |
| TGGGCGAGGGGTGGGCTCTCAGAG  | 19 | 24 | 0.0344 |

|                          |    |    |        |
|--------------------------|----|----|--------|
| CGGGTGGGAGCAGATCTTATTGAG | 19 | 24 | 0.0344 |
| ACTCTAGCTGCCAAAGGCGCT    | 14 | 22 | 0.0344 |
| GCTTGTGCGTGCGGTGTGCT     | 17 | 18 | 0.203  |
| AATGGCTGTCCGTAGTATGGTC   | 15 | 21 | 0.203  |
| TTGCCAGGGCAGGAGGTGGAA    | 14 | 23 | 0.203  |
| GTGCGGAACGCTGGCCGGGGCG   | 13 | 23 | 0.203  |
| TGTGTGGATCCTGGAGGAGGCA   | 17 | 24 | 0.203  |
| CGTCCCGGGGCTGCGCGAGGCA   | 14 | 24 | 0.203  |
| TGGGCTAAGGGAGATGATTGGGTA | 18 | 24 | 0.203  |
| GTGGGCTGGGCTGGGCTGGGCC   | 18 | 25 | 0.203  |
| TCGACCGGACCTCGACCGGCT    | 13 | 22 | 0.203  |
| TCTTCACTGCCTCGCTGCA      | 14 | 24 | 0.203  |
| GTTGGGGTGCAGGGGTCTGCT    | 13 | 19 | 0.0648 |
| GAGGTTTGGGGAGGATTTGCT    | 14 | 23 | 0.0648 |
| AGCTCTGCTGCTACTGGCAGT    | 13 | 23 | 0.0344 |
| GGTGGGGGGTGTGTTTT        | 15 | 19 | 0.0344 |
| AGGGAGGGACGGGGGCTGTGC    | 13 | 21 | 0.0344 |
| AGCTGTCTGAAAATGTCTT      | 15 | 17 | 0.275  |
| CAGGGGCTGGGGTTTCAGTTCT   | 19 | 21 | 0.275  |
| ACAGGCGGCTGTAGCAATGGGGG  | 13 | 22 | 0.275  |
| GCAGGAACTTGTGAGTCTCT     | 16 | 22 | 0.275  |
| TCCAGTACCACGTGTCAGGGCCA  | 13 | 22 | 0.203  |
| GTCCAGTTTTCCAGGAATCCCT   | 16 | 23 | 0.203  |
| CTCCGTTTGCCTGTTTCGCTG    | 16 | 23 | 0.203  |
| TTCCGGCTCGCGTGGGTGTGT    | 17 | 24 | 0.203  |
| TGGGTGGAAGAAGGTCTGGTT    | 14 | 21 | 0.0344 |
| TGATATGTTTGATATTGGGTT    | 17 | 22 | 0.0344 |
| AGGCAGTGTAGTTAGCTGATTGC  | 20 | 22 | 0.0344 |
| AGGCAGTGTATTGTTAGCTGGC   | 17 | 22 | 0.0344 |
| GAGCAGGCGAGGCTGGGCTGAA   | 15 | 22 | 0.0344 |
| AGGCGGGGCGCCGCGGACCGC    | 14 | 22 | 0.0344 |
| TAGGTAGTTTCTGTTGTTGGG    | 16 | 23 | 0.0344 |
| CAGGCAGGTGTAGGGTGGAGC    | 15 | 23 | 0.0344 |
| TCCCCTTCTGCAGGCCTGCTGG   | 14 | 22 | 0.0344 |
| CTGGGCTCGGGACGCGCGGCT    | 13 | 20 | 0.0778 |
| CCTGAGCCCAGGCGCGCAG      | 13 | 21 | 0.0778 |
| GTTTGCACGGGTGGGCCTGTCT   | 12 | 22 | 0.0778 |
| CATCTTACTGGGCAGCATTGGA   | 16 | 23 | 0.0778 |
| CGTCTTACCCAGCAGTGTGTTGG  | 17 | 23 | 0.0778 |
| GAGTGTAGTTCTGAGCAGAGC    | 15 | 19 | 0.332  |
| CGGGGTGGGTGAGGTGCGGC     | 16 | 21 | 0.332  |
| AGCAGTGTGTTGTTTTGCCACA   | 15 | 21 | 0.332  |
| ACAAGGTGTGCATGCCTGACC    | 17 | 22 | 0.332  |
| ACAGGCGGCTGTAGCAATGGGGG  | 17 | 24 | 0.332  |
| CTGGGGGGAGGAGACCCTGCT    | 14 | 20 | 0.143  |
| ACTGGGGAGCAGAAGGAGAACC   | 15 | 21 | 0.143  |
| GTTGGGGTGCAGGGGTCTGCT    | 17 | 21 | 0.143  |



|                         |    |    |        |
|-------------------------|----|----|--------|
| CATTACTTTTTGGTACGCG     | 17 | 24 | 0.111  |
| TGTGTTAGAATAGGGCAATAA   | 13 | 21 | 0.0778 |
| TGGCTGCTTCCCTTGGTCTCCAG | 13 | 22 | 0.0778 |
| GAGGGTTGGGTGGAGGCTCTCC  | 16 | 23 | 0.0778 |
| CAGGTCGTCTTGACAGGGCTTCT | 16 | 23 | 0.0778 |
| AGGGTGGGGCTGGAGGTGGGGCT | 15 | 23 | 0.0778 |
| TAAGGTGCATCTAGTGCAGTTAG | 16 | 24 | 0.0778 |
| GGGGGGCAGGAGGGGGCTCAGGG | 12 | 24 | 0.0778 |
| GTAGGGGCGTCCCGGGCGCGGG  | 20 | 25 | 0.0778 |
| AATCTGAGAAGGCGCACAAGGT  | 13 | 20 | 0.0778 |
| GCAGTTCTGAGCACAGTACAC   | 16 | 22 | 0.0778 |
| TGGTCTGTCTCTGCCCTGGCAC  | 16 | 26 | 0.0778 |
| ACCCTATCAATATTGTCTCTGC  | 15 | 22 | 0.0344 |
| AGGGCCGAAGGGTGAAGCTGC   | 17 | 25 | 0.0344 |
| AGTATTCTGTACCAGGAAGGT   | 16 | 21 | 0.0778 |
| TGCCTCTTTCCACGCGCTCAG   | 15 | 21 | 0.0778 |
| TGCAACTTACCTGAGTCATTGA  | 17 | 21 | 0.0778 |
| CTCATCTGCAAAGAAGTAAGTG  | 14 | 22 | 0.0778 |
| ATTGCCTCTGTTCTAACACAAG  | 17 | 23 | 0.0778 |
| CACTGCATTCTGCTTGGCCCAG  | 18 | 24 | 0.0778 |
| TATTGCACTTGCCCGCCTGT    | 21 | 24 | 0.0778 |
| TCACCTGGCTGGCCCCGCCAG   | 19 | 27 | 0.0778 |
| GCTAGTCCTGACTCAGCCAGT   | 15 | 20 | 0.203  |
| TCTGGGGTCTTGGGCCATC     | 15 | 20 | 0.203  |
| TCGGGCGCAAGAGCACTGCAGT  | 17 | 20 | 0.0344 |
| TCGGGCTGGGGTTGGGGGAGC   | 15 | 20 | 0.0344 |
| GTAAGCAGGGGCTCTGGGTGA   | 16 | 20 | 0.0344 |
| TTCACAGTGGCTAAGTTCTGC   | 17 | 21 | 0.0344 |
| ACTGGACTTGGAGTCAGAAGGC  | 16 | 17 | 0.0344 |
| ACTGGACTTGGAGTCAGGA     | 14 | 17 | 0.0344 |
| ACTGGACTTAGGGTCAGAAGGC  | 16 | 17 | 0.0344 |
| TCTGGTCCTGGACAGGAGGC    | 14 | 17 | 0.0344 |
| TCTCTGGGCCTGTGTCTTAGGC  | 15 | 19 | 0.0344 |
| CAAGTCTTATTTGAGCACCTGTT | 12 | 23 | 0.0344 |
| AGGGACTTTTGGGGGCAGATGTG | 15 | 23 | 0.0344 |
| AAAGACCCATTGAGGAGAAGGT  | 16 | 23 | 0.0344 |
| GCGGTGATCCCGATGGTGTGAGC | 18 | 24 | 0.0344 |
| TGCCTGGAACATAGTAGGGACT  | 12 | 21 | 0.203  |
| TGTCGTGGGGCTTGCTGGCTTG  | 17 | 21 | 0.203  |
| GTGTCTGGGCGGACAGCTGC    | 14 | 22 | 0.203  |
| ATGTATGTGTGCATGTGCATG   | 18 | 22 | 0.203  |
| CAGGGCTGGGGTTTACAGTTCT  | 17 | 21 | 0.203  |
| TGGCAGTGTCTTAGCTGGTTGT  | 16 | 24 | 0.203  |
| GGGGCTGGGCGCGGCC        | 12 | 18 | 0.143  |
| AGAGGCTGAGAAGGTGATGTTG  | 17 | 19 | 0.143  |
| TGAGGGGCAGAGAGCGAGACTTT | 16 | 21 | 0.143  |
| TGGGAGCTGGACTACTTC      | 16 | 21 | 0.143  |

|                          |    |    |        |
|--------------------------|----|----|--------|
| TGGGAGGGCGTGGATGATGGTG   | 16 | 21 | 0.143  |
| CTGGGAGGTGGATGTTTACTTC   | 18 | 22 | 0.143  |
| GGCAGGAGGGCTGTGCCAGGTTG  | 14 | 21 | 0.111  |
| AGCCAGGCTCTGAAGGGAAAGT   | 18 | 25 | 0.0344 |
| CGGCGCGACCGCCCCGGGG      | 12 | 19 | 0.0344 |
| AGGGACGGGACGCGGTGCAGTG   | 13 | 20 | 0.0344 |
| TCTTCTCTGTTTTGCCATGTG    | 17 | 21 | 0.203  |
| GGCTTTCTAGTCTCAGCTCTCC   | 15 | 22 | 0.203  |
| CACCTTTGTGTCCCCATCCTGCA  | 14 | 23 | 0.203  |
| TGAGGACAGGGCAAATTCACGA   | 15 | 21 | 0.0344 |
| CCCGGAGCCAGGATGCAGCTC    | 16 | 21 | 0.0778 |
| GCGGGGGTGGCGGCGCATCCC    | 15 | 21 | 0.0778 |
| CTCGGGGCAGGCGGCTGGGAGCG  | 14 | 21 | 0.0778 |
| TCCAGGGAGACAGTGTGTGAG    | 15 | 21 | 0.0778 |
| CTCCTGAGCCATTCTGAGCCTC   | 15 | 22 | 0.0778 |
| CTCTAGAGGGAAGCACTTTCTG   | 16 | 22 | 0.0778 |
| CTCTAGAGGGAAGCGCTTTCTG   | 16 | 22 | 0.0778 |
| CTCTAGAGGGAAGCACTTTCTC   | 15 | 22 | 0.0778 |
| CTCTAGAGGGAAGCGCTTTCTG   | 16 | 22 | 0.0778 |
| CTCTAGAGGGAAGCGCTTTCTG   | 16 | 22 | 0.0778 |
| CTCTAGAGGGAAGCGCTTTCTG   | 16 | 22 | 0.0778 |
| CTCTAGAGGGAAGCGCTTTCTG   | 16 | 22 | 0.0778 |
| CTCTAGAGGGAAGCACTTTCTG   | 16 | 22 | 0.0778 |
| CTCTAGAGGGAAGCGCTTTCTG   | 16 | 22 | 0.0778 |
| CTCTAGAGGGAAGCGCTTTCTG   | 16 | 22 | 0.0778 |
| GGTGGGGCAATGGGATCAGGT    | 16 | 23 | 0.0344 |
| TGGGAGAGAGGACTGTGAGGC    | 18 | 25 | 0.0344 |
| TGGGGAGCTGAGGCTCTGGGGGTG | 15 | 25 | 0.0344 |
| AGCTGTCTGAAAATGTCTT      | 15 | 20 | 0.203  |
| TAGCTTATCAGACTGATGTTGA   | 17 | 21 | 0.203  |
| TTGCAGCTGCCTGGGAGTGACTTC | 17 | 24 | 0.203  |
| TCATTTATCTGTTGGGAAGCTA   | 17 | 23 | 0.111  |
| GCAGTCCATGGGCATATACAC    | 16 | 19 | 0.0778 |
| TGGTTCTAGACTTGCCAACTA    | 14 | 23 | 0.0778 |
| AGGGGTGTGGAAGAGGCAGAACA  | 14 | 25 | 0.0778 |
| CCTGCGTGTTTTCTGTCCAA     | 15 | 20 | 0.35   |
| TGGATGACAGTGAGGCCT       | 14 | 17 | 0.0344 |
| CTTGGGAGCCCTGTTAGACTC    | 15 | 19 | 0.0344 |
| TCTGGCTCCGTGTCTTCACTCCC  | 13 | 24 | 0.0344 |
| CCGCTTTCTGAGCTGGAC       | 14 | 18 | 0.203  |
| ACTCCAGTTTTAGTTCTCTTG    | 16 | 22 | 0.203  |
| CAGTGCCTCGGCAGTGCAGCCC   | 12 | 19 | 0.203  |
| GCTGATGATGATGGTGCTGAAG   | 13 | 21 | 0.203  |
| ATCTAAATGCAGCATGCCAGTC   | 15 | 22 | 0.203  |
| TTAGCTTAAGGAGTACCAGATC   | 15 | 22 | 0.0344 |
| AGGCAGGGGCTGGTGCTGGGCGGG | 12 | 23 | 0.111  |
| TGGCAGTGTCTTAGCTGGTTGT   | 16 | 23 | 0.111  |

|                           |    |    |        |
|---------------------------|----|----|--------|
| ACTGGACTTGGAGTCAGAAGAGTGG | 16 | 23 | 0.0344 |
| GCTCTGACGAGGTTGCACTACT    | 16 | 25 | 0.0344 |
| AGTTTGGGATGGAGAGAGGAGA    | 15 | 23 | 0.0104 |
| TGAGGCCCTTGGGGCACAGTGG    | 16 | 20 | 0.203  |
| TGTCTACTACTGGAGACTGG      | 14 | 24 | 0.203  |
| TTGCTAAGTAGGCTGAGATTGA    | 13 | 21 | 0.203  |
| TGTGTCCGGGAAGTGGAGGAGG    | 14 | 22 | 0.203  |
| GTGAGCCAGTGGAATGGAGAGG    | 17 | 23 | 0.203  |
| CGGCTCTGGGTCTGTGGGGA      | 13 | 20 | 0.0344 |
| TCTGGTATGTAGTAGGTAATAA    | 16 | 22 | 0.0344 |
| CTCTAGCCACAGATGCAGTGAT    | 16 | 23 | 0.0344 |
| TACTCTGGAGAGTGACAATCATG   | 13 | 25 | 0.0344 |
| GCTGGGCGAGGCTGGCA         | 13 | 15 | 0.143  |
| GAGGCTGATGTGAGTAGACCACT   | 13 | 23 | 0.0648 |
| TGAGGCTCTGTTAGCCTTGCTC    | 14 | 24 | 0.0648 |
| CCGTCGCCGCCACCCGAGCCG     | 13 | 21 | 0.332  |
| TTACACAGCTGGACAGAGGCA     | 14 | 21 | 0.332  |
| ACACATGGGTGGCTGTGGCCT     | 16 | 21 | 0.332  |
| TTGGACGGTAAGGTTAAGCAA     | 16 | 21 | 0.332  |
| TCCAGTACCACGTGTCAGGGCCA   | 16 | 22 | 0.332  |
| GTGCCAGCTGCAGTGGGGGAG     | 15 | 20 | 0.203  |
| TGTGGGTTCTGGGTTGGGGTGA    | 15 | 23 | 0.203  |
| CTGTGGGCTCAGCTCTGGG       | 15 | 20 | 0.203  |
| CCTGTGCTCCCAGGGCCTCGC     | 13 | 21 | 0.203  |
| TGTTTCGGGGCTCATGGCCTGTG   | 17 | 23 | 0.203  |
| GTGCGTGGTGGCTCGAGGCGGG    | 17 | 24 | 0.203  |
| TCTGCAGGGTTTGCTTTGAG      | 15 | 17 | 0.143  |
| AGGCTGCGGAATTCAGGAC       | 14 | 19 | 0.143  |
| GAGGTTTGGGGAGGATTTGCT     | 16 | 20 | 0.143  |
| TGGGGCGGAGCTTCCGGAG       | 13 | 21 | 0.143  |
| GGGAGGTGTGATCTCACACTCG    | 14 | 22 | 0.143  |
| AGGGGGTAGAAAGTGGCTGAAG    | 15 | 22 | 0.143  |
| TGGGAGGAGGGGATCTTGGG      | 19 | 23 | 0.143  |
| GGGGGGGCAGGAGGGGCTCAGGG   | 18 | 23 | 0.143  |
| TGGGAGAGCAGGGTATTGTGGA    | 16 | 23 | 0.143  |
| TGGGGGTGTGGGGAGAGAGAG     | 16 | 23 | 0.143  |
| TTGGGATGGTAGGACCAGAGGGG   | 18 | 24 | 0.143  |
| TTGGGGTGGTCGGCCCTGGAG     | 17 | 24 | 0.143  |
| TCTGGGAGGTTGTAGCAGTGGA    | 16 | 25 | 0.143  |
| GGATCCGAGTCACGCACCA       | 13 | 18 | 0.0344 |
| GTAAGGGACCGGAGAGTAGGA     | 14 | 21 | 0.0344 |
| GGGCTAGGGCCTGCTGCCCC      | 14 | 23 | 0.0344 |
| TCTGCCATAGGAAGCTTGGAGTGG  | 17 | 21 | 0.0344 |
| AATTGCACTTAGCAATGGTGA     | 18 | 22 | 0.0344 |
| CCAGAGGTGGGGACTGAG        | 14 | 20 | 0.0778 |
| AGTCATTGGAGGGTTTGGAGCAG   | 16 | 23 | 0.111  |
| CACTGGCTCCTTCTGGGTAGA     | 16 | 22 | 0.0344 |

|                          |    |    |        |
|--------------------------|----|----|--------|
| GAGCTTGGTCTGTAGCGTT      | 13 | 19 | 0.0344 |
| AGGCTGGGCTGGGACGGA       | 13 | 19 | 0.0344 |
| ACTCGGCGTGGCGTCGGTCGTG   | 15 | 23 | 0.0344 |
| ACTCGGCTGCGGTGGACAAGT    | 18 | 23 | 0.0344 |
| TGCGGGGCTAGGGCTAACAGCA   | 14 | 20 | 0.0344 |
| CGGGTGGATCACGATGCAATTT   | 12 | 22 | 0.0344 |
| TGGGGGAGGAAGGACAGGCCAT   | 13 | 22 | 0.0344 |
| AGTGCCTGCTATGTGCCAGGCA   | 15 | 21 | 0.0344 |
| TCCACTCTCCTGGCCCCAG      | 13 | 20 | 0.203  |
| TTCCGCCAGTCGGTGGCCGG     | 15 | 21 | 0.203  |
| CTCCCCGGCCTCTGCCCCAG     | 15 | 21 | 0.203  |
| ACTCACCTGGTCCACTAGCCGT   | 16 | 22 | 0.203  |
| CCTTCACTGTGACTCTGCTGCAG  | 17 | 22 | 0.203  |
| GGATATCATCATATACTGTAAG   | 16 | 24 | 0.203  |
| TGACCCACCCCTCTCCACCAG    | 14 | 24 | 0.203  |
| TGGCTTCTTGCACACCAG       | 16 | 25 | 0.203  |
| GGGCTAGGGCCTGCTGCCCCC    | 14 | 24 | 0.143  |
| TCACACCTGCCTCGCCCCC      | 16 | 21 | 0.0778 |
| TCACCCTGCATCCCGCACCCAG   | 19 | 21 | 0.0778 |
| CCGCTCTTCCCCTGACCCAG     | 15 | 21 | 0.0778 |
| ATTGGACTGCTGATGGCCCGT    | 15 | 22 | 0.0778 |
| TCCACTCTCCTGGCCCCAG      | 14 | 22 | 0.0778 |
| TGCCTACTGAGCTGAAACACAG   | 15 | 23 | 0.0778 |
| TGCCGCCCTCTCGCTGCTCTAG   | 17 | 23 | 0.0778 |
| CGGCAACAAGAACTGCCTGAG    | 14 | 24 | 0.0778 |
| GGGACCATCCTGCCTGCTGTGG   | 18 | 24 | 0.0778 |
| AGGGCTGGACTCAGCGCGGAGCT  | 15 | 25 | 0.0778 |
| CATAGCCCGGTCGCTGGTACATGA | 15 | 26 | 0.0778 |
| AGGGGTGGTGTGGGACAGCTCCGT | 17 | 26 | 0.0778 |
| CTCATTTAAGTAGTCTGATGCC   | 17 | 22 | 0.0344 |
| TGGTCTAGGATTGTTGGAGGAG   | 13 | 21 | 0.0344 |
| TCTGCACTGTGAGTTGGCTGGCT  | 16 | 25 | 0.0344 |
| AGGCGGAGACTTGGGCAATTG    | 14 | 20 | 0.0344 |
| AGGCAAGATGCTGGCATAGCT    | 16 | 20 | 0.0344 |
| TGAGGTAGGAGGTTGTATAGTT   | 15 | 22 | 0.0344 |
| CAGGATCCACAGAGCTAGTCCA   | 12 | 22 | 0.143  |
| TTGGGATCATTTTGCATCCATA   | 14 | 24 | 0.143  |
| TGAGGGACAGATGCCAGAAGCA   | 16 | 22 | 0.0344 |
| GTGAGTGGGAGCCCCAGTGTGTG  | 12 | 23 | 0.0344 |
| AGCGAGGTTGCCCTTTGTATAT   | 13 | 24 | 0.0344 |
| TGGGTAGAGAAGGAGCTCAGAGGA | 18 | 26 | 0.0344 |
| TGTTTGTGTAAAGGATCGTTGT   | 18 | 19 | 0.0344 |
| GTGAGACTTCTCTCCCTCAG     | 14 | 20 | 0.0344 |
| TGGTGGGCACAGAATCTGGACT   | 13 | 22 | 0.0344 |
| TGGTGCGGAGAGGGCCACAGTG   | 13 | 22 | 0.0344 |
| TCTTCACTGCCTCTGCCTGCA    | 16 | 20 | 0.275  |
| TGTGCTTGCTCGTCCCGCCGCA   | 16 | 22 | 0.275  |

|                          |    |    |        |
|--------------------------|----|----|--------|
| TGTTGTCATGTTTTTCCCTAG    | 17 | 22 | 0.275  |
| AGAGGCTGAGAAGGTGATGTTG   | 13 | 23 | 0.0648 |
| CACTGTTTCACCACTGGCTCTT   | 15 | 23 | 0.203  |
| AGGCATGGGAGGTCAGGTGA     | 14 | 21 | 0.0344 |
| AGGCATGGGAGGTCAGGTGA     | 14 | 21 | 0.0344 |
| TGGGGGAGTGCAGTGATTGTGG   | 16 | 20 | 0.0344 |
| GGGGCTGGGGCCGGGCGGAGC    | 15 | 20 | 0.0344 |
| GTGGGTGCTGGTGGGAGCCGTG   | 13 | 21 | 0.0344 |
| CTGGGAGGGGCTGGGTTTGGC    | 13 | 21 | 0.0344 |
| TTGGGGGTGAGGTTGGTGTCTGG  | 14 | 23 | 0.0866 |
| GAGGCTGAAGGAAGATGG       | 12 | 18 | 0.0648 |
| AGAGGCTGGCCGTGATGAATTC   | 14 | 19 | 0.0648 |
| TGAGGTGGTAGGATGTAGA      | 12 | 19 | 0.0648 |
| TTGTGGCTGGTCATGAGGCTAA   | 13 | 20 | 0.0648 |
| GGGTTGTAGCTTTGCTGGCATG   | 14 | 24 | 0.0648 |
| TGAGCTAAATGTGTGCTGGGA    | 14 | 21 | 0.0344 |
| GCGGGGTGGCGGCGGCATCCC    | 15 | 25 | 0.0344 |
| CTTGAGTCGTGCCTTTCTGAATG  | 15 | 22 | 0.35   |
| GGGTGCGGGCCGGCGGGG       | 12 | 17 | 0.332  |
| AGGTGGTCCGTGGCGGTTTCGC   | 17 | 21 | 0.332  |
| CACTCAGCCTTGAGGGCACTTTC  | 16 | 26 | 0.332  |
| GGATGGTTGGGGGCGGTGCGCGT  | 13 | 24 | 0.203  |
| TCTGCCCCCTCCGCTGCTGCCA   | 12 | 22 | 0.0778 |
| TTTGTGACCTGGTCCACTAACC   | 13 | 22 | 0.0778 |
| AGCGCGGGCTGAGCGCTGCCAGTC | 16 | 24 | 0.332  |
| TAGGCAGTGTGATTAGCTGATTG  | 17 | 24 | 0.332  |
| CACATATGAAGTGAGCCAGCAC   | 18 | 24 | 0.332  |
| CCTGCAGAGAGGAAGCCCTTC    | 18 | 25 | 0.332  |
| CCCGGACAGGCGTTCGTGCGACGT | 17 | 26 | 0.332  |
| TGCGGGGACAGGCCAGGGCATC   | 15 | 19 | 0.143  |
| CATGGGGTAGGGCAGAGTAGG    | 13 | 19 | 0.143  |
| ACACATGGGTGGCTGTGGCCT    | 14 | 20 | 0.143  |
| CAGGGTCAGCTGAGCATG       | 15 | 17 | 0.0778 |
| CCAGTGTGGCTCAGCGAG       | 12 | 18 | 0.0778 |
| TCTAGGCTGGTACTGCTGA      | 13 | 19 | 0.0778 |
| CCTATTCTTGTTACTTGACAG    | 17 | 23 | 0.0778 |
| CCTGTCTGTGCCTGCTGTACA    | 17 | 23 | 0.0778 |
| AGTTGCCAGGGCTGCCTTTGGT   | 14 | 24 | 0.0778 |
| TGCACCATGGTTGTCTGAGCATG  | 16 | 25 | 0.111  |
| TGGGCTGGCAGGGCAAGTGCTG   | 15 | 18 | 0.0344 |
| CCAGTGACTGAGCTGGAGCCA    | 14 | 22 | 0.0344 |
| GGGTGCGGGCCGGCGGGG       | 12 | 18 | 0.0344 |
| TGGGCTGAGGGCAGGAGGCCTGT  | 17 | 19 | 0.0344 |
| TGGGGGAGATGGGGTTGA       | 13 | 19 | 0.0344 |
| GTGGGTTGGGGCGGGCTCTG     | 17 | 20 | 0.0344 |
| CTGGGTTGGGCTGGGCTGGG     | 14 | 20 | 0.0344 |
| GGGCTAGGGCCTGCTGCCCC     | 13 | 24 | 0.0344 |

|                         |    |    |        |
|-------------------------|----|----|--------|
| CCTGCAGCGACTTGATGGCTTCC | 14 | 27 | 0.0344 |
| GTGGGTTGGGGCGGGCTCTG    | 14 | 20 | 0.203  |
| CTGGGTTGGGCTGGGCTGGG    | 14 | 20 | 0.203  |
| CATGCCTTGAGTGAGGACCGT   | 14 | 21 | 0.203  |
| CAGTGCCAGAGCCCTGCAGTG   | 12 | 22 | 0.203  |
| GTGTCTGCTTCTGTGGGA      | 12 | 19 | 0.203  |
| CTTTCAGTCGGATGTTTGCAGC  | 18 | 23 | 0.203  |
| CTTTCAGTCAGATGTTTGCTGC  | 19 | 23 | 0.203  |
| CTTTCAGTCGGATGTTTACAGC  | 17 | 23 | 0.203  |
| CAGGGCTGGCAGTGACATGGGT  | 17 | 20 | 0.0778 |
| GGGAGCCAGGAAGTATTGATGT  | 16 | 20 | 0.0778 |
| TAGGGTAGACACTGACAACGTT  | 14 | 20 | 0.0778 |
| CGGGGCCAGAGCAGAGAGC     | 14 | 20 | 0.0778 |
| TGGGGCGGGGCAGGTCCCTGC   | 14 | 20 | 0.0778 |
| TTAGGGCCCTGGCTCCATCTCC  | 16 | 21 | 0.0778 |
| TCAGCAGGCAGGCTGGTGCAGC  | 12 | 21 | 0.0778 |
| TTAGGCCATCATCCCATTATGC  | 18 | 21 | 0.0778 |
| TTAGTGTGATAATGGCGTTTGA  | 17 | 22 | 0.0778 |
| ACCAGGGCCAGCAGGGAATGT   | 15 | 22 | 0.0778 |
| TTGGGGGTGAGGTTGGTGTCTGG | 16 | 22 | 0.0778 |
| CTCCTGGGGCCCGCACTCTCGC  | 19 | 23 | 0.0778 |
| CTGTACAGGCCACTGCCTTGC   | 19 | 25 | 0.0778 |
| AGCTACATTGTCTGCTGGGTTTC | 15 | 21 | 0.0344 |
| AGGTTGCCTGTGAGGTGTTCA   | 14 | 22 | 0.0344 |
| TAAGGTGCATCTAGTGCAGTTAG | 16 | 23 | 0.0344 |
| CAAGCTCGTGTCTGTGGGTCCG  | 14 | 23 | 0.0344 |
| TATCCAGCTTGTTACTATATGC  | 15 | 18 | 0.0778 |
| TGCTAGTCTGGACTGATATGGT  | 16 | 21 | 0.0778 |
| GTGCATTGCTGTTGCATTGC    | 15 | 22 | 0.0778 |
| GTGGTTATCCCTGCTGTGTTCCG | 15 | 22 | 0.0778 |
| AGGTGTTATCCTATCCATTTGC  | 19 | 24 | 0.0778 |
| TGAGGGCTCCAGGTGACGGTGG  | 19 | 26 | 0.0778 |
| TGGGGGCTGGGATGGGCCATGGT | 18 | 26 | 0.0778 |
| GTGGGTTGGGGCGGGCTCTG    | 14 | 21 | 0.0344 |
| AGCTACATCTGGCTACTGGGT   | 17 | 24 | 0.0344 |
| AGTGGACATGTTTGTGTGAG    | 18 | 24 | 0.0344 |
| GGGCTGGGGCGCGGGGAGGT    | 15 | 25 | 0.0344 |
| CTTTCAGTCGGATGTTTGCAGC  | 16 | 22 | 0.203  |
| CTTTCAGTCAGATGTTTGCTGC  | 17 | 22 | 0.203  |
| CTTTCAGTCGGATGTTTACAGC  | 16 | 22 | 0.203  |
| TAGTGCAATATTGCTTATAGGGT | 13 | 21 | 0.203  |
| TTAATGCTAATCGTGATAGGGT  | 14 | 22 | 0.203  |
| TCAAATGCTCAGACTCCTGTGGT | 15 | 23 | 0.203  |
| CCTGAGCCCCGGCCGCGCAG    | 12 | 23 | 0.203  |
| GGTCTAGGCCCGGTGAGAGACTC | 13 | 25 | 0.203  |
| GCCGGGGCTTTGGGTGAGGG    | 17 | 20 | 0.203  |
| TGCTAGTCTGGACTGATATGGT  | 15 | 21 | 0.203  |

|                          |    |    |        |
|--------------------------|----|----|--------|
| GTGCGTGGTGGCTCGAGGCGGGG  | 18 | 22 | 0.203  |
| CAGGGCCCTGGCTTTAGCAGA    | 15 | 19 | 0.0344 |
| AGCGGTGCTCCTGCGGGCCGA    | 13 | 21 | 0.0344 |
| GGCTGGGTGCTCTTGTGCAGT    | 17 | 21 | 0.0344 |
| AGGCAGGGGCTGGTGTGGGCGGG  | 17 | 22 | 0.0344 |
| CAGGCAGTGA CTGTTCAGACGTC | 15 | 23 | 0.0344 |
| AGCAGTGT TTTGTTTTGCCACA  | 14 | 22 | 0.0344 |
| GGTAGTGAGTTATCAGCTAC     | 14 | 19 | 0.0648 |
| GAGGTTTTCTGGGTTTCTGTTTC  | 14 | 24 | 0.0648 |
| AGGGCTGGACTCAGCGGCGGAGCT | 13 | 24 | 0.0648 |
| AGGGGTGTGGAAGAGGCAGAACA  | 15 | 24 | 0.0648 |
| TGGCGGGGGTAGAGCTGGCTGC   | 14 | 20 | 0.143  |
| GGGGCTGGGGCCGGGGCCGAGC   | 14 | 21 | 0.143  |
| TGAGGCGGGGGGGCGAGC       | 16 | 22 | 0.143  |
| TGGGGCTAGTGATGCAGGACG    | 15 | 22 | 0.143  |
| AGAGGCTGGCCGTGATGAATTC   | 12 | 22 | 0.143  |
| GGGATGGTAGACCGGTGACGTGC  | 16 | 23 | 0.143  |
| GGGGGTGTGGAGCCAGGGGGC    | 16 | 23 | 0.143  |
| TGGGTGGTCTGGAGATTTGTGC   | 17 | 24 | 0.143  |
| CGGGAGCTGGGGTCTGCAGGT    | 16 | 24 | 0.143  |
| CTGGGAGGTGTGATATTGTGGT   | 18 | 25 | 0.143  |
| TCTGGGGATGAGGACAGTGTGT   | 18 | 26 | 0.143  |
| ACTGGGGCTTTTCGGGCTCTGCGT | 19 | 26 | 0.143  |
| AGGCTGCGGAATTCAGGAC      | 13 | 16 | 0.0778 |
| TGAGCTGCTGTACCAAAAT      | 13 | 18 | 0.0778 |
| GTAGGGGAGGTTGGGCCAGGGA   | 16 | 19 | 0.0778 |
| ATCATGATGGGCTCCTCGGTGT   | 17 | 22 | 0.0778 |
| TTCACCACCTTCTCCACCCAGC   | 16 | 21 | 0.203  |
| ACTCCATTTGTTTTGATGATGGA  | 15 | 23 | 0.203  |
| GTTTCACCATGTTGGTCAGGC    | 16 | 23 | 0.203  |
| ACTCCAGCCCCACAGCCTCAGC   | 17 | 23 | 0.203  |
| AGACTTCCCATTTGAAGGTGGC   | 18 | 25 | 0.203  |
| TACTGCAGACGTGGCAATCATG   | 13 | 19 | 0.0778 |
| TCTACAGTGCACGTGTCTCCAGT  | 17 | 23 | 0.0778 |
| GCCTGCTGGGGTGGAACCTGGT   | 15 | 23 | 0.0778 |
| GCTGAACTGGGCTGAGCTGGGC   | 18 | 23 | 0.0778 |
| AGCAGCATTGTACAGGGCTATGA  | 16 | 24 | 0.0778 |
| AGCAGCATTGTACAGGGCTATCA  | 16 | 24 | 0.0778 |
| TGCCTACTGAGCTGATATCAGT   | 16 | 24 | 0.0778 |
| CGCCGCGCGCATCGGCTCAGC    | 19 | 24 | 0.0778 |
| GGCTGGGTGCTCTTGTGCAGT    | 16 | 24 | 0.0778 |
| TAGGCACACTTAAAGTTATAGC   | 14 | 25 | 0.0778 |
| GATCCATCTCTGCCTGTATTGGC  | 18 | 25 | 0.0778 |
| TGGGCTGAGGGCAGGAGGCCTGT  | 16 | 26 | 0.0778 |
| GGGGCTGGGGCCGGGGCCGAGC   | 15 | 26 | 0.0778 |
| CAGGCAGTGA CTGTTCAGACGTC | 14 | 24 | 0.0344 |
| CAGGTCGTCTTGCAGGGCTTCT   | 18 | 24 | 0.0344 |

|                           |    |    |        |
|---------------------------|----|----|--------|
| TGGGTGTAGGCTGGAGCTGAGG    | 16 | 24 | 0.0344 |
| TTTCAAGCCAGGGGCGTTTTTC    | 15 | 23 | 0.0344 |
| AGGGCTTAGCTGCTTGTGAGCA    | 16 | 23 | 0.0344 |
| GGGTGAGGGCAGGTGGTT        | 12 | 17 | 0.0344 |
| CTCTAGAGGGAAGCACTTTCTG    | 12 | 26 | 0.0344 |
| CTCTAGAGGGAAGCACTTTCTC    | 12 | 26 | 0.0344 |
| CTCTAGAGGGAAGCACTTTCTG    | 12 | 26 | 0.0344 |
| CTCTAGAGGGAAGCACTTTCTG    | 12 | 26 | 0.0344 |
| GTGGGCTGGGCTGGGCTGGGCC    | 14 | 23 | 0.0344 |
| AGAGGCTGAGAAGGTGATGTTG    | 16 | 24 | 0.0344 |
| ACAGTAGTCTGCACATTGGTTA    | 16 | 23 | 0.0344 |
| ACAGTAGTCTGCACATTGGTTA    | 16 | 23 | 0.0344 |
| TGTCGTGGGGCTTGCTGGCTTG    | 18 | 24 | 0.0344 |
| AGCGGTGCTCCTGCGGGCCGA     | 14 | 20 | 0.0344 |
| TGTCTCTCGCCCTTGGCCTTAG    | 15 | 23 | 0.275  |
| TCTGTATTCTCCTTTCCTGCAG    | 15 | 25 | 0.275  |
| GGCTTTCTAGTCTCAGCTCTCC    | 18 | 21 | 0.203  |
| TATTGCACTCGTCCCAGCCTCC    | 16 | 21 | 0.203  |
| TGTGACTGCATTATGAAAATTCT   | 18 | 23 | 0.203  |
| GTGAGTCAGGGTGGGGCTGG      | 15 | 21 | 0.332  |
| TCACAGTGGTCTCTGGGATTAT    | 14 | 26 | 0.332  |
| TATACAAGGGCAAGCTCTCTGT    | 18 | 27 | 0.332  |
| CAGTTATCACAGTGCTGATGCT    | 17 | 19 | 0.203  |
| ATCCAGTTCTCTGAGGGGGCT     | 14 | 22 | 0.203  |
| GGCTGGAGCGAGTGCAGTGGTG    | 13 | 23 | 0.0648 |
| GGCTGAGTGGGGTTCTGACTCC    | 14 | 23 | 0.0648 |
| AGGCTCTAACTGGCTTCCCTGCA   | 13 | 24 | 0.0648 |
| GGAGGCCGGGGTGGGGCGGGGCGG  | 15 | 26 | 0.0648 |
| GGGTGAGGGCAGGTGGTT        | 14 | 20 | 0.143  |
| GGGCTGGGGCGCGGGGAGGT      | 15 | 21 | 0.143  |
| TGGGCTCAGGGTACAAAGGTT     | 15 | 22 | 0.143  |
| AGGGCTTAGCTGCTTGTGAGCA    | 13 | 22 | 0.143  |
| AGGGCTGGA CT CAGCGCGGAGCT | 13 | 22 | 0.143  |
| TGAGGTAGTAGGTTGTGTGGTT    | 14 | 23 | 0.143  |
| TGAGGTAGTAGGTTGTATGGTT    | 14 | 23 | 0.143  |
| AGAGGTAGTAGGTTGCATAGTT    | 13 | 23 | 0.143  |
| AGGGGCTGGCTTTCCTCTGGTC    | 15 | 23 | 0.143  |
| TGGGGCGGAGCTTCCGGAGGCC    | 14 | 23 | 0.143  |
| GGAGGCGCAGGCTCGGAAAGGCG   | 15 | 23 | 0.143  |
| AGGGGCGCAGTCACTGACGTG     | 16 | 24 | 0.143  |
| TGGGAGGGGAGAGGCAGCAAGCA   | 16 | 25 | 0.143  |
| TGCGGGGCTAGGGCTAACAGCA    | 16 | 25 | 0.143  |
| TGGGAGAGAGGACTGTGAGGC     | 16 | 25 | 0.143  |
| TTGAGGAGACATGGTGGGGGCC    | 15 | 20 | 0.0778 |
| CTCGTGGGCTCTGGCCACGGCC    | 17 | 23 | 0.0778 |
| CTCGGGCGGAGGTGGTTGAGTG    | 15 | 21 | 0.332  |
| CCCGCAGGTGAGATGAGGGCT     | 16 | 21 | 0.332  |



|                          |    |    |        |
|--------------------------|----|----|--------|
| AGGCTGTGATGCTCTCCTGAGCCC | 17 | 22 | 0.143  |
| TGAGGCTCTGTTAGCCTTGGCTC  | 14 | 24 | 0.143  |
| GGAGGCCGGGGTGGGGCGGGGCGG | 14 | 24 | 0.143  |
| GGATGGTTGGGGGCGGTTCGGCGT | 18 | 24 | 0.143  |
| GCTGACTCCTAGTCCAGGGCTC   | 15 | 21 | 0.275  |
| AGGCTGTGATGCTCTCCTGAGCCC | 14 | 23 | 0.275  |
| GGTAGTGAGTTATCAGCTAC     | 16 | 20 | 0.0344 |
| TCAGGCCAGGCACAGTGGCTCA   | 15 | 23 | 0.0344 |
| TCAGGCAGTGTGGGTATCAGAT   | 14 | 23 | 0.0344 |
| CTCGGC CGGGGCGCGGGCTCC   | 17 | 24 | 0.0344 |
| CCTGCGTGTTTTCTGTCCAA     | 14 | 21 | 0.0344 |
| GGCTGGAGCGAGTGCAGTGGTG   | 16 | 22 | 0.0344 |
| AGGCTGTGATGCTCTCCTGAGCCC | 12 | 23 | 0.0344 |
| ACTCGATCCTTCCCTTGGCAG    | 13 | 20 | 0.0344 |
| TGAGGCTCTGTTAGCCTTGGCTC  | 15 | 25 | 0.0344 |
| TCATATTGCTTCTTTCT        | 15 | 19 | 0.0778 |
| ATCACATTGCCAGGGATTTCC    | 13 | 20 | 0.0778 |
| ATCACATTGCCAGTGATTACCC   | 16 | 20 | 0.0778 |
| TGCGACATTGGAAGTAGTATCA   | 14 | 21 | 0.0778 |
| GGCCACTGAGTCAGCACCA      | 14 | 21 | 0.0778 |
| AGCTACAGTTACTTTTGCACCA   | 16 | 21 | 0.0778 |
| GGCTAGCAACAGCGCTTACCT    | 17 | 21 | 0.0778 |
| AGACACATTTGGAGAGGGACCC   | 15 | 21 | 0.0778 |
| AGCACACTGAGCGAGCGGAC     | 14 | 21 | 0.0778 |
| TGGCGGCGGTAGTTATGGGCTT   | 15 | 22 | 0.0778 |
| CGAGCCTCAAGCAAGGGACTT    | 15 | 23 | 0.0778 |
| AGAGCTTAGCTGATTGGTGAAC   | 17 | 23 | 0.0778 |
| AGAGTTAACTCAAATGGACTA    | 17 | 23 | 0.0778 |
| TGAGCCGAGCTGAGCTTAGCTG   | 15 | 23 | 0.0778 |
| TGGGCCAGGGAGCAGCTGGTGGG  | 13 | 23 | 0.0778 |
| AGGGTGGGGCTGGAGGTGGGGCT  | 16 | 23 | 0.0778 |
| CAGTGCCTCGGCAGTGCAGCCC   | 17 | 24 | 0.0778 |
| AGGAGCTATCCACTCCAGGTGTCC | 17 | 24 | 0.0778 |
| AAGGGGCAGGGACGGGTGGCCC   | 15 | 24 | 0.0778 |
| CAGGTCGTCTTGCAGGGCTTCT   | 17 | 24 | 0.0778 |
| TTAGGCCGCAGATCTGGGTGA    | 17 | 25 | 0.0778 |
| CCAGGGAGGCTGGTTTGGAGGA   | 16 | 25 | 0.0778 |
| GCAGGTGCTCACTTGTCTCTCT   | 18 | 25 | 0.0778 |
| CTATGGCGAGACTGGCATGTACTC | 20 | 25 | 0.0778 |
| GGTCTAGGCCCGGTGAGAGACTC  | 18 | 28 | 0.0778 |
| TAACAGTCTCCAGTCACGGCC    | 15 | 22 | 0.275  |
| TGATTGTCTTCATATCTAGAAC   | 15 | 22 | 0.275  |
| CGGGCTGTCCGGAGGGGTCCGGCT | 14 | 23 | 0.275  |
| TCGTGGCCTGGTCTCCATTAT    | 12 | 20 | 0.332  |
| TCAGGCCTCTTTCTACCTT      | 12 | 20 | 0.332  |
| CATCAGCACCTATGTCCTTTCT   | 14 | 22 | 0.0778 |
| TGCATCAGGCCAGAAGACATGAG  | 14 | 24 | 0.0778 |

|                          |    |    |        |
|--------------------------|----|----|--------|
| TTGCTCTGCTCCCCGCCCCAG    | 16 | 25 | 0.0778 |
| GGAGGCCGGGGTGGGGCGGGGCGG | 16 | 25 | 0.0344 |
| CGGGGCCATGGAGCAGCCTGTGT  | 14 | 25 | 0.0344 |
| CTCGGGCGGAGGTGGTTGAGTG   | 16 | 20 | 0.0344 |
| CTTTCAGTCGGATGTTTGCAGC   | 16 | 22 | 0.0344 |
| ATGTATGTGTGCATGTGCATG    | 13 | 21 | 0.0344 |
| GGCTGGGTGCTCTTGTGCAGT    | 15 | 23 | 0.0344 |
| TGAGTGTGTGTGTGTGAGTGTGT  | 18 | 25 | 0.0344 |
| ATCACATTGCCAGGGATTACC    | 13 | 19 | 0.0778 |
| AGTGGCACATGTTTGTGTGAG    | 14 | 20 | 0.0778 |
| CAGCCACAACCTACCCTGCCACT  | 14 | 21 | 0.0778 |
| AGGGCTTAGCTGCTTGTGAGCA   | 16 | 22 | 0.0778 |
| TGAGACCAGGACTGGATGCACC   | 16 | 22 | 0.0778 |
| TGGGCCATGCATTTCTAGAACT   | 15 | 22 | 0.0778 |
| GAGGGCAGCGTGGGTGTGGCGGA  | 16 | 23 | 0.0778 |
| GAGGGCATGCGCACTTTGTCC    | 19 | 23 | 0.0778 |
| AGGAGCAGTGCCGGCCAAGGCGCC | 14 | 23 | 0.0778 |
| GGGGTCCCCGGTGCTCGGATC    | 17 | 23 | 0.0778 |
| CAGGGCCTGGCTTAGCAGA      | 15 | 23 | 0.0778 |
| CCTGGGCAGCGTGTGGCTGAAGG  | 15 | 24 | 0.0778 |
| CCAGAGCAGCCTGCGGTAACAGT  | 14 | 24 | 0.0778 |
| CTTGAGTCGTGCCTTTCTGAATG  | 13 | 24 | 0.0778 |
| CTCGGCGGGGCGGGGCTCC      | 16 | 25 | 0.0778 |
| TCTACAGTGACGTGTCTCCAGT   | 17 | 25 | 0.0778 |
| ATGTATGTGTGCATGTGCATG    | 12 | 20 | 0.0778 |
| TTGTGTGAGTACAGAGAGCATC   | 16 | 20 | 0.0778 |
| GCTGACAGCAGGGCTGGCCGCT   | 15 | 21 | 0.0778 |
| GCTGCGGGCTGCGGTCAGGGCG   | 17 | 21 | 0.0778 |
| TACTGCATCAGGAAGTATTGGA   | 13 | 22 | 0.0778 |
| AGGTGTGTCTGTAGAGTCC      | 16 | 22 | 0.0778 |
| AACTCTGTCTTCACTCATGAGT   | 14 | 22 | 0.0778 |
| CACTGTTTCTTTCTGAGTGGA    | 13 | 22 | 0.0778 |
| TATTGCACTCGTCCCGGCTCC    | 19 | 22 | 0.0778 |
| CACTGTTTCACTGCTCTT       | 13 | 22 | 0.0778 |
| ACCTTGCTTGTGCTGCCGGGCC   | 19 | 23 | 0.0778 |
| ATACTGTGAATTTCACTGTCACA  | 18 | 23 | 0.0778 |
| ACTTGATGCTAGCTCAGGTAG    | 16 | 23 | 0.0778 |
| GGGGCTGTGATTGACCAGCAGG   | 16 | 24 | 0.0778 |
| CGCGCCTGCAGGAAGTGGTAGA   | 14 | 24 | 0.0778 |
| CCAATATTGGCTGTGCTGCTCC   | 17 | 25 | 0.0778 |
| AGCTACATTGTCTGCTGGGTTTC  | 21 | 27 | 0.0778 |
| TGGGGCGGGGAGGTCCCTGC     | 15 | 23 | 0.275  |
| CAGCAGCAATTCATGTTTGA     | 16 | 24 | 0.275  |
| GGGGAAGTGTAGATGAAAAGGC   | 14 | 24 | 0.275  |
| TAGGAGCTCAACAGATGCCTGTT  | 14 | 24 | 0.275  |
| TCAGCTGGCCCTCATTTT       | 12 | 19 | 0.332  |
| ACATCCTGCTCCACAGGGCAGAGG | 14 | 22 | 0.0778 |

|                           |    |    |        |
|---------------------------|----|----|--------|
| TGTCTCTCGCCCTTGGCCTTAG    | 14 | 23 | 0.0778 |
| TTGGGCTGGGCTGGGTTGGG      | 17 | 22 | 0.0344 |
| CGGTGAGCGCTCGCTGGC        | 14 | 18 | 0.332  |
| ACGGTGCTGGATGTGGCCTTT     | 13 | 19 | 0.332  |
| CCAGTGTGGCTCAGCGAG        | 15 | 19 | 0.332  |
| CAGGCAGTGA CTGTT CAGACGTC | 16 | 22 | 0.332  |
| CACACAGGAAAAGCGGGGCCCTG   | 14 | 22 | 0.332  |
| AGCACACTGAGCGAGCGGAC      | 17 | 22 | 0.332  |
| TCAGGCAGTGTGGGTATCAGAT    | 15 | 23 | 0.332  |
| TTGCACTCTGGCCTTCTCCCAGG   | 15 | 22 | 0.0344 |
| AGCTACATTGTCTGCTGGGTTTC   | 16 | 23 | 0.0344 |
| CACTGCATTCTGCTTGCC CAG    | 16 | 23 | 0.0344 |
| GTGTGGCCGGCAGGCGGGTGG     | 14 | 24 | 0.0344 |
| CAGGATCCACAGAGCTAGTCCA    | 15 | 22 | 0.0344 |
| GTGTGGCCGGCAGGCGGGTGG     | 16 | 23 | 0.0344 |
| AACCCAGTGGGCTATGGAAATG    | 12 | 20 | 0.0778 |
| TTGGGCC CAGGAGTAAACAGGAT  | 12 | 23 | 0.0778 |
| TGAGGAGATGCTGGGACTGA      | 13 | 18 | 0.143  |
| GGGGAGGTGTGCAGGGCTGG      | 13 | 18 | 0.143  |
| TGGGGGAGATGGGGTTGA        | 15 | 18 | 0.143  |
| CTGGGACAGGAGGAGGAGGCAG    | 15 | 19 | 0.143  |
| CTGGGAGGGGCTGGGTTTGGC     | 16 | 19 | 0.143  |
| GCTGGGAAGGCAAAGGGACGT     | 16 | 20 | 0.143  |
| GCAGGGACAGCAAAGGGGTGC     | 14 | 20 | 0.143  |
| CCACCGGGGATGAATGTCAC      | 16 | 22 | 0.143  |
| AGCTACATCTGGCTACTGGGT     | 14 | 19 | 0.0778 |
| AGGTTACCCGAGCAACTTTGCAT   | 17 | 20 | 0.0778 |
| TGGCCGATGGGACAGGAGGCAT    | 14 | 20 | 0.0778 |
| GGGCCTCTTTGTCATCCTGCAG    | 17 | 20 | 0.0778 |
| AGAGCTGGCTGAAGGGCAG       | 14 | 21 | 0.0778 |
| TGGGCTGGCAGGGCAAGTGCTG    | 14 | 21 | 0.0778 |
| TGAGCTAAATGTGTGCTGGGA     | 15 | 21 | 0.0778 |
| CAGGGCCTCACTGTATCGCCCA    | 16 | 22 | 0.0778 |
| TAGCAGCGGGAACAGTTCTGCAG   | 14 | 22 | 0.0778 |
| AGGAGGCAGCGCTCTCAGGAC     | 16 | 22 | 0.0778 |
| CGGGGCCATGGAGCAGCCTGTGT   | 17 | 22 | 0.0778 |
| ACGGATGTTT GAGCATGTGCTA   | 14 | 23 | 0.0778 |
| TCTAGAGGAAGCACTTTCTGTTT   | 17 | 24 | 0.0778 |
| CCCTGGGCCTCTGCTCCCCAG     | 13 | 24 | 0.0778 |
| ATTGGGAACATTTTGCATGTAT    | 19 | 25 | 0.0778 |
| TTCCTGGGCTTCTCCTCTGTAG    | 17 | 25 | 0.0778 |
| GTGTCTGGGCGGACAGCTGC      | 15 | 17 | 0.0778 |
| TTGCACTTGTCTCAGTGA        | 15 | 19 | 0.0778 |
| GCTGCACCGGAGACTGGGTAA     | 15 | 20 | 0.0778 |
| ACTCGCATCCTTCCCTTGGCAG    | 15 | 20 | 0.0778 |
| CAGTGCAATGTTAAAAGGGCAT    | 14 | 21 | 0.0778 |
| CACTGCAGGACTCAGCAG        | 16 | 21 | 0.0778 |

|                          |    |    |        |
|--------------------------|----|----|--------|
| CCACTGCCTATGCCCCACAG     | 15 | 22 | 0.0778 |
| TGGACTGCCCTGATCTGGAGA    | 13 | 23 | 0.0778 |
| CACATATGAAGTGAGCCAGCAC   | 17 | 23 | 0.0778 |
| CGCACCTGCCTCTCACCCACAG   | 19 | 23 | 0.0778 |
| CCGCACTGTGGGTACTTGCTGC   | 20 | 24 | 0.0778 |
| CCAGACTGTGGCTGACCAGAGG   | 15 | 24 | 0.0778 |
| CCACGTGCTTCTTTCCGCAG     | 17 | 24 | 0.0778 |
| CCCTGCTGCCTTACCTGCCAG    | 15 | 24 | 0.0778 |
| TTCCACTGCCACTACCTAATTT   | 14 | 25 | 0.0778 |
| GGCTACAACACAGGACCCGGGC   | 19 | 26 | 0.0778 |
| TGTCACTCGGCTCGGCCACTAC   | 18 | 26 | 0.0778 |
| CAGCCGCCGCTGTCTCCACAG    | 18 | 27 | 0.0778 |
| GGGAGTGCAGGGCAGGGTTTC    | 15 | 20 | 0.0778 |
| TGGGGAGCGGGCCCCGGGTGGG   | 14 | 21 | 0.0778 |
| AGGGGTGCTATCTGTGATTGA    | 12 | 21 | 0.0778 |
| AAAGGTGCTCAAATTAGACAT    | 16 | 21 | 0.0778 |
| GTGAGTGTGGATCCTGGAGGAAT  | 18 | 22 | 0.0778 |
| CAGAAGGGGAGTTGGGAGCAGA   | 15 | 23 | 0.0778 |
| CATGGGGTAGGGCAGAGTAGG    | 15 | 23 | 0.0778 |
| TGGCTGTTGGAGGGGGCAGGC    | 15 | 21 | 0.0778 |
| GGGGCTGGGGCCGGGGCCGAGC   | 18 | 21 | 0.0778 |
| TAGGAGCTCAACAGATGCCTGTT  | 13 | 22 | 0.0778 |
| AAGGTATTGTTCAGACTTATGA   | 18 | 22 | 0.0778 |
| TGGGTGTAGGCTGGAGCTGAGG   | 12 | 22 | 0.0778 |
| TAAGGTGCATCTAGTGCAGATAG  | 19 | 23 | 0.0778 |
| TGGGGGTGGTCTTAGCCAAGG    | 16 | 23 | 0.0778 |
| TGGGGGCTGGATGGGGTAGAGT   | 15 | 23 | 0.0778 |
| TAGGTTATCCGTGTTGCCTTCG   | 13 | 22 | 0.284  |
| TAAGTGCTTCCATGTTTGAGTGT  | 16 | 22 | 0.284  |
| AAAGTTCTGAGACACTCCGACT   | 14 | 21 | 0.0866 |
| TAGAGTCTGGCTGATATGGTTT   | 14 | 23 | 0.111  |
| ACAGTAGTCTGCACATTGGTTA   | 20 | 24 | 0.111  |
| ACAGTAGTCTGCACATTGGTTA   | 20 | 24 | 0.111  |
| GTGTGCGGAAATGCTTCTGCTA   | 12 | 21 | 0.203  |
| GTGTGGCCGGCAGGCGGGTGG    | 16 | 23 | 0.203  |
| TGCCTGGGTCTCTGGCCTGCGCGT | 15 | 26 | 0.203  |
| TGGGGCGGAGCTTCCGGAG      | 15 | 20 | 0.0344 |
| TTGTGGCTGGTCATGAGGCTAA   | 15 | 21 | 0.0344 |
| TGGGTGGTCTGGAGATTTGTGC   | 14 | 21 | 0.0344 |
| TGGGTGTAGGCTGGAGCTGAGG   | 15 | 21 | 0.0344 |
| CATCTGGCATCCGTCACACAGA   | 17 | 20 | 0.0778 |
| TGCATCACAGCCTTTGGCCCTAG  | 15 | 22 | 0.0778 |
| TTGCACTCTGGCCTTCTCCAGG   | 16 | 23 | 0.0778 |
| TCTGCCATCCTCCCTCCCCTAC   | 13 | 24 | 0.0778 |
| CCTGCAACTTTGCCTGATCAGA   | 17 | 24 | 0.0778 |
| TCTGTGCTTACCCCTACCCAG    | 16 | 24 | 0.0778 |
| ACTGGGTAGGTGGGGCTCCAGG   | 15 | 24 | 0.0778 |

|                          |    |    |        |
|--------------------------|----|----|--------|
| TATTCATTTATCCCCAGCCTACA  | 18 | 25 | 0.0778 |
| TCTGGGTGCAGTGGGGTT       | 13 | 20 | 0.203  |
| CTGGGAGAAGAGTGGTGAAGA    | 16 | 23 | 0.143  |
| TTGGGGGTGAGGTTGGTGTCTGG  | 17 | 23 | 0.143  |
| TCTGTGGAGTGGGGTGCCTGT    | 16 | 24 | 0.143  |
| CAGTTGGGTCTAGGGTTCAGGA   | 17 | 25 | 0.143  |
| CTGGGTGAGGGCATCTGTGGT    | 14 | 22 | 0.0344 |
| GTGCGTGGTGGCTCGAGGCGGGG  | 14 | 23 | 0.0344 |
| CGGTGAGCGCTCGCTGGC       | 15 | 19 | 0.0344 |
| TGGCAGTGTATTGTTAGCTGGT   | 16 | 22 | 0.0344 |
| TCAGCAGGCAGGCTGGTGCAGC   | 19 | 24 | 0.0344 |
| CTTTCAGTCAGATGTTTGTCTGC  | 17 | 19 | 0.0344 |
| AGTATTCTGTACCAGGGAAGGT   | 14 | 22 | 0.0344 |
| GTGCATTGCTGTTGCATTGC     | 16 | 21 | 0.111  |
| ATCGCTGCGGTTGCGAGCGCTGT  | 18 | 25 | 0.111  |
| TCTGTCATTTCTTTAGGCCAATA  | 17 | 21 | 0.35   |
| CCTGCGAGTCTCCGGCGGTGG    | 16 | 21 | 0.35   |
| AGCGGTGCTCCTGCGGGCCGA    | 14 | 19 | 0.332  |
| CCGCACTGTGGTACTTGCTGC    | 17 | 22 | 0.332  |
| TGGGCTGAGGGCAGGAGGCCTGT  | 15 | 26 | 0.143  |
| TGGCTGTTGGAGGGGGCAGGC    | 15 | 21 | 0.0344 |
| CGGGACTGTAGAGGGCATGAGC   | 18 | 23 | 0.0344 |
| CAGGCAGGTGTAGGGTGGAGC    | 12 | 20 | 0.0344 |
| GGGAGGTGTGATCTCACACTCG   | 13 | 23 | 0.0344 |
| GGGGGGCAGGAGGGGCTCAGGG   | 17 | 24 | 0.0344 |
| CTCTAGAGGGAAGCGCTTTCTG   | 15 | 25 | 0.0344 |
| CTCTAGAGGGAAGCGCTTTCTG   | 15 | 25 | 0.0344 |
| CTCTAGAGGGAAGCGCTTTCTG   | 15 | 25 | 0.0344 |
| CTCTAGAGGGAAGCGCTTTCTG   | 15 | 25 | 0.0344 |
| AGGCTGGAGTGAGCGGAG       | 13 | 18 | 0.0648 |
| AGGTTGCCTGTGAGGTGTTCA    | 15 | 18 | 0.0648 |
| TGAGGTAGTAGTTTGTGCTGTT   | 14 | 20 | 0.0648 |
| TGAGTGTGTGTGTGTGAGTGTGT  | 16 | 20 | 0.0648 |
| TGAGGGTGTGAGCAGGTGACG    | 16 | 20 | 0.0648 |
| GGGGAGCTGTGGAAGCAGTA     | 14 | 20 | 0.0648 |
| TTGGGCTGGGCTGGGTTGGG     | 14 | 21 | 0.0648 |
| GTGGGTGCTGGTGGGAGCCGTG   | 15 | 21 | 0.0648 |
| TTGGGGATTGGGTCAGGCCAGT   | 13 | 21 | 0.0648 |
| TTTGAGGCTACAGTGAGATGTG   | 15 | 22 | 0.0648 |
| CTCTAGAGGGAAGCGCTTTCTG   | 15 | 25 | 0.0344 |
| CTCTAGAGGGAAGCGCTTTCTG   | 15 | 25 | 0.0344 |
| TTGCTCTGAGCTCCGAGAAAGC   | 12 | 22 | 0.0778 |
| TCTGTAGCCTGGGAGCAATGGGGT | 12 | 23 | 0.0778 |
| GGCGGGTGCGGGGGTGG        | 13 | 16 | 0.143  |
| GGGGCGCGCCGGATCG         | 12 | 16 | 0.143  |
| ATAGTGGGAAGCTGGCAGATTC   | 16 | 21 | 0.143  |
| AGAGGTATAGGGCATGGGAA     | 13 | 20 | 0.0778 |

|                          |    |    |        |
|--------------------------|----|----|--------|
| AGAGCTCACAGCTGTCCTTCTCTA | 16 | 20 | 0.0778 |
| TAGCAGCACATAATGGTTTGTG   | 18 | 21 | 0.0778 |
| AGGAGCTAGCCAGGCATATGCA   | 17 | 21 | 0.0778 |
| TAGAGTCTGGCTGATATGGTTT   | 14 | 21 | 0.0778 |
| CCGGGGCAGATTGGTGTAGGGTG  | 15 | 22 | 0.0778 |
| TTCAAGCCAGGGGGCGTTTTTC   | 16 | 24 | 0.0778 |
| GTTGGGGTGCAGGGGTCTGCT    | 15 | 19 | 0.0344 |
| GCGGGGCTGGGCGCGCG        | 13 | 16 | 0.0778 |
| GTGCATTGTAGTTGCATTGCA    | 17 | 23 | 0.0778 |
| AGGGCTGGACTCAGCGGCGGAGCT | 16 | 25 | 0.0778 |
| AGGAGCTAGCCAGGCATATGCA   | 17 | 25 | 0.0778 |
| CGGGCTGTCCGGAGGGGTGCGCT  | 15 | 25 | 0.0778 |
| TAGGGGCAGCAGAGGACCTGGG   | 18 | 27 | 0.0778 |
| AGTTTGGGATGGAGAGAGGAGA   | 15 | 20 | 0.0344 |
| ATCCAGTTCTCTGAGGGGGCT    | 16 | 24 | 0.0344 |
| TTCCAGCCCTGGTAGGCGCCGCG  | 16 | 24 | 0.0344 |
| ACTGGATTTGGAGCCAGAA      | 14 | 19 | 0.0778 |
| CGCTCTAGGCACCGCAGCA      | 16 | 20 | 0.0778 |
| CACAGCAAGTGTAGACAGGCA    | 15 | 20 | 0.0778 |
| CACTGTGGGTACATGCT        | 13 | 20 | 0.0778 |
| AGCTGTACCTGAAACCAAGCA    | 16 | 20 | 0.0778 |
| ACCTTGCATCTGCATCCCCAG    | 16 | 21 | 0.0778 |
| TGCACGGCACTGGGGACACGT    | 13 | 22 | 0.0778 |
| CTATACGACCTGCTGCCTTCT    | 14 | 23 | 0.0778 |
| CTACCCTCGGTCTGCTTACCACA  | 17 | 23 | 0.0778 |
| GGAGGCGCAGGCTCGGAAAGGCG  | 17 | 27 | 0.0778 |
| GGGCTGGGGCGCGGGGAGGT     | 14 | 20 | 0.0344 |
| CTCGGGCGGAGGTGGTTGAGTG   | 14 | 23 | 0.0344 |
| AGGCGGGGCGCCGCGGGACCGC   | 15 | 23 | 0.0344 |
| TTGCACTTGTCTCAGTGA       | 14 | 20 | 0.0344 |
| GCTGCACCGGAGACTGGGTAA    | 14 | 21 | 0.0344 |
| GCTGACTCCTAGTCCAGGGCTC   | 15 | 21 | 0.0344 |
| CATTGCACTTGTCTCGGTCTGA   | 17 | 22 | 0.0344 |
| CTGGGTTGGGCTGGGCTGGG     | 16 | 20 | 0.0344 |
| TCACCTGGCTGGCCCCGCCAG    | 13 | 25 | 0.0344 |
| GTGCATTGCTGTTGCATTGC     | 13 | 20 | 0.0344 |
| TTTCCTGTCTCCAACCAGACC    | 13 | 21 | 0.275  |
| GGCTCCTCCTCTCAGGATGTG    | 12 | 22 | 0.203  |
| TGGGTGGTCTGGAGATTTGTGC   | 15 | 24 | 0.332  |
| TCTGGCTGTTGTGGTGTGCAA    | 16 | 22 | 0.203  |
| TCTGGCTGTGCTGTAATGCAG    | 14 | 22 | 0.203  |
| CCTGTCTGTGCCTGCTGTACA    | 18 | 22 | 0.203  |
| AGGTGTGTCTGTAGAGTCC      | 16 | 18 | 0.0778 |
| GGGGCGCGGCCGGATCG        | 14 | 19 | 0.0778 |
| TGGGCTGCTGAGAAGGGGCA     | 14 | 19 | 0.0778 |
| AAGGGGCAGGGACGGGTGGCCC   | 14 | 19 | 0.0778 |
| CAGGGTCAGCTGAGCATG       | 12 | 18 | 0.143  |

|                          |    |    |        |
|--------------------------|----|----|--------|
| TGCAGGACCAAGATGAGCCCT    | 13 | 19 | 0.143  |
| TGCTGGGGGCCACATGAGTGTG   | 15 | 22 | 0.143  |
| GGCTGGGTGCTCTGTGCAGT     | 14 | 22 | 0.143  |
| TGGGCGAGGGCGGCTGAGCGGC   | 16 | 24 | 0.143  |
| GGGGCTGTGATTGACCAGCAGG   | 15 | 24 | 0.143  |
| TTGTTCTTTGGTCTTTAGCCA    | 19 | 21 | 0.275  |
| AGCGGTGCTCCTGCGGGCCGA    | 14 | 19 | 0.0778 |
| TCTCACTGTAGCCTCGAACCCC   | 15 | 20 | 0.0778 |
| TCACCTGAGCTCCCGTGCCTG    | 13 | 20 | 0.0778 |
| GTCATACACGGCTCTCCTCTCT   | 16 | 21 | 0.0778 |
| CGTCAACACTTGCTGGTTTCCT   | 15 | 22 | 0.0778 |
| AGCCGCTCTTCTCCCTGCCACA   | 17 | 22 | 0.0778 |
| GGGCTAGGGCCTGCTGCCCCC    | 15 | 23 | 0.0778 |
| AGGGATCGCGGGCGGGTGCGGCCT | 17 | 24 | 0.0778 |
| TGGAGTCCAGGAATCTGCATTTT  | 19 | 25 | 0.0778 |
| CAGGCCATATTGTGCTGCCTCA   | 22 | 25 | 0.0778 |
| AAGGGCTTCTCTCTGCAGGAC    | 16 | 25 | 0.0778 |
| AGGGGGCGCAGTCACTGACGTG   | 17 | 25 | 0.0778 |
| CAGAGTGACAAGCTGGTTAAAG   | 13 | 25 | 0.0778 |
| TCAGGCCAGGCACAGTGGCTCA   | 19 | 26 | 0.0778 |
| TCAGGCCTCTTTCTACCTT      | 16 | 26 | 0.0778 |
| TTCAGATCCCAGCGGTGCCTCT   | 19 | 27 | 0.0778 |
| GTGTCTGCTTCTGTGGGA       | 13 | 19 | 0.0778 |
| CATTGCACTTGTCTCGGTCTGA   | 17 | 23 | 0.0778 |
| AATTGCACGGTATCCATCTGTA   | 13 | 23 | 0.0778 |
| CACTGTGTCCTTTCTGCGTAG    | 15 | 23 | 0.0778 |
| AAAGATCTGGAAGTGGGAGACA   | 18 | 24 | 0.0866 |
| CCTCACCCAGCTCTCTGGCCCTCT | 12 | 25 | 0.0778 |
| AAGGGCTGGGGGAGCACA       | 16 | 21 | 0.0778 |
| TAAAGTGCTGACAGTGCAGAT    | 14 | 22 | 0.0778 |
| TGTCACCTCGGCTCGGCCACTAC  | 13 | 23 | 0.0344 |
| TGAGGTAGTAGATTGTATAGTT   | 16 | 22 | 0.0344 |
| TGGGGCGGAGCTTCCGGAGGCC   | 15 | 22 | 0.0344 |
| CATCTCCAGTACAGTGTGGGA    | 14 | 22 | 0.203  |
| TGCTGAGGTCCGGGCTGTGCC    | 14 | 25 | 0.143  |
| GGAGGCGCAGGCTCGGAAAGGCG  | 17 | 22 | 0.0344 |
| TGAGGCCCTTGGGGCACAGTGG   | 18 | 21 | 0.0344 |
| TGGGCAGGGGCTTATTGTAGGAG  | 15 | 25 | 0.0344 |
| TGAGGCTAATGCACTACTTCAC   | 14 | 19 | 0.0344 |
| TGGGCGAGGGCGGCTGAGCGGC   | 12 | 23 | 0.0344 |
| TGGGAGAGCAGGGTATTGTGGA   | 12 | 23 | 0.0344 |
| TGGGGAGGTGTGGAGTCAGCAT   | 17 | 23 | 0.0344 |
| TGAGGCTAATGCACTACTTCAC   | 12 | 21 | 0.0648 |
| TCTGGCTGTTGTGGTGTGCAA    | 17 | 19 | 0.0344 |
| TGTCTTCTCCTCCCAAACAG     | 15 | 25 | 0.275  |
| TGTCTTTCTTCTCTCCCTTGCA   | 14 | 25 | 0.275  |
| TCTAGTGCGGGCGTTCCCG      | 13 | 19 | 0.203  |

|                         |    |    |        |
|-------------------------|----|----|--------|
| CTGACTGTTGCCGTCCTCCAG   | 16 | 22 | 0.203  |
| TCGTGTCTTGTGTTGCAGCCGG  | 17 | 23 | 0.203  |
| ATCTGTCTCGATTGTTCCAG    | 15 | 24 | 0.203  |
| TTTCTGTCTTTTCTGGTCCAG   | 19 | 25 | 0.203  |
| TTGTCTCTTGTTCCTCACACAG  | 17 | 22 | 0.275  |
| ATTGTCCCTCTCCCTTCCAG    | 16 | 23 | 0.275  |
| TCTGTGCTTCACCCCTACCCAG  | 17 | 23 | 0.275  |
| AGCTGTCTGTGTTTTCTTCTCAG | 17 | 24 | 0.275  |
| AGACTGACGGCTGGAGGCCCAT  | 14 | 25 | 0.275  |
| CAAGCTCGCTTCTATGGGTCTG  | 16 | 19 | 0.284  |
| CAAGCTCGTGTCTGTGGGTCCG  | 16 | 19 | 0.284  |
| CGGGACTGTAGAGGGCATGAGC  | 12 | 21 | 0.0648 |
| GGGGCTGTGATTGACCAGCAGG  | 17 | 21 | 0.0648 |
| TGAGGTAGTAGATTGTATAGTT  | 12 | 22 | 0.0648 |
| TGAGGTAGTAGTTTGTACAGTT  | 13 | 22 | 0.0648 |
| TGGGGCTAGTGATGCAGGACG   | 14 | 22 | 0.0648 |
| TGGGGGTGTGGGGAGAGAGAG   | 15 | 22 | 0.0648 |
| CAGGTCGTCTTGCAGGGCTTCT  | 13 | 20 | 0.284  |
| CCAATATTGGCTGTGCTGCTCC  | 13 | 22 | 0.111  |
| GCTGGTCTGCGTGGTGCTCGG   | 12 | 22 | 0.284  |
