# Supplementary material for: Dual biomarkers long non-coding RNA GAS5 and microRNA-34a co-expression signature in common solid tumors
Source: PubMed Central journal article supplement (PMC6173395; doi:10.1371/journal.pone.0198231), 2018-10-05
Supplement: pone.0198231.s004.pdf [file pone.0198231.s004.pdf]

**S4 Table. Complementarity between GAS5 transcripts and miR-34a-5p.**

|    | <b>GAS5 transcript</b> | <b>Trascript ID</b> | <b>Length (bp)</b> | <b>lncRNA binding sequence</b> |
|----|------------------------|---------------------|--------------------|--------------------------------|
| 1  | ENST00000412059        | <b>GAS5-201</b>     | 979                | CAAGCCTAACTCAAGCCATTGGCA       |
| 2  | ENST00000412059        | <b>GAS5-201</b>     | 979                | CCAATGATGTAATGATTCTGCCA        |
| 3  | ENST00000414075        | <b>GAS5-202</b>     | 413                | ACAACAAGCAAGCATGCAGCTT         |
| 4  | ENST00000416952        | <b>GAS5-203</b>     | 799                | CAAGCCTAACTCAAGCCATTGGCA       |
| 5  | ENST00000421068        | <b>GAS5-204</b>     | 1060               | CAAGCCTAACTCAAGCCATTGGCA       |
| 6  | ENST00000422008        | <b>GAS5-205</b>     | 497                | CAAGCCTAACTCAAGCCATTGGCA       |
| 7  | ENST00000422207        | <b>GAS5-207</b>     | 643                | ACAACAAGCAAGCATGCAGCTT         |
| 8  | ENST00000430245        | <b>GAS5-228</b>     | 723                | ACAACAAGCAAGCATGCAGCTT         |
| 9  | ENST00000430245        | <b>GAS5-209</b>     | 723                | CAAGCCTAACTCAAGCCATTGGCA       |
| 10 | ENST00000431268        | <b>GAS5-210</b>     | 1698               | CAAGCCTAACTCAAGCCATTGGCA       |
| 11 | ENST00000431268        | <b>GAS5-210</b>     | 1698               | CCAATGATGTAATGATTCTGCCA        |
| 12 | ENST00000432536        | <b>GAS5-211</b>     | 959                | CAAGCCTAACTCAAGCCATTGGCA       |
| 13 | ENST00000434796        | <b>GAS5-212</b>     | 575                | ACAACAAGCAAGCATGCAGCTT         |
| 14 | ENST00000436285        | <b>GAS5-213</b>     | 772                | ACAACAAGCAAGCATGCAGCTT         |
| 15 | ENST00000436656        | <b>GAS5-214</b>     | 822                | ACAACAAGCAAGCATGCAGCTT         |
| 16 | ENST00000436656        | <b>GAS5-214</b>     | 822                | CAAGCCTAACTCAAGCCATTGGCA       |
| 17 | ENST00000443799        | <b>GAS5-216</b>     | 897                | ACAACAAGCAAGCATGCAGCTT         |
| 18 | ENST00000444470        | <b>GAS5-217</b>     | 424                | ACAACAAGCAAGCATGCAGCTT         |
| 19 | ENST00000449289        | <b>GAS5-219</b>     | 542                | ACAACAAGCAAGCATGCAGCTT         |
| 20 | ENST00000449289        | <b>GAS5-219</b>     | 542                | CAAGCCTAACTCAAGCCATTGGCA       |
| 21 | ENST00000449589        | <b>GAS5-220</b>     | 712                | ACAACAAGCAAGCATGCAGCTT         |
| 22 | ENST00000449589        | <b>GAS5-220</b>     | 712                | CAAGCCTAACTCAAGCCATTGGCA       |
| 23 | ENST00000450589        | <b>GAS5-226</b>     | 632                | ACAACAAGCAAGCATGCAGCTT         |
| 24 | ENST00000450589        | <b>GAS5-226</b>     | 632                | CAAGCCTAACTCAAGCCATTGGCA       |
| 25 | ENST00000451607        | <b>GAS5-222</b>     | 1007               | ACAACAAGCAAGCATGCAGCTT         |
| 26 | ENST00000451607        | <b>GAS5-222</b>     | 1007               | CAAGCCTAACTCAAGCCATTGGCA       |
| 27 | ENST00000452197        | <b>GAS5-223</b>     | 483                | CAAGCCTAACTCAAGCCATTGGCA       |
| 28 | ENST00000454068        | <b>GAS5-224</b>     | 688                | ACAACAAGCAAGCATGCAGCTT         |
| 29 | ENST00000454068        | <b>GAS5-224</b>     | 688                | CAAGCCTAACTCAAGCCATTGGCA       |
| 30 | ENST00000455838        | <b>GAS5-221</b>     | 632                | CAAGCCTAACTCAAGCCATTGGCA       |
| 31 | ENST00000458220        | <b>GAS5-229</b>     | 469                | CAAGCCTAACTCAAGCCATTGGCA       |
| 32 | ENST00000454813        | <b>GAS5-225</b>     | 621                | CCAATGATGTAATGATTCTGCCA        |

| Predicted target site | miR-34a        | Predicted miRNA site   |
|-----------------------|----------------|------------------------|
| 129-153               | hsa-miR-34a-5p | TGGCAGTGTCTTAGCTGGTTGT |
| 618-641               | hsa-miR-34a-5p | TGGCAGTGTCTTAGCTGGTTGT |
| 205-227               | hsa-miR-34a-5p | TGGCAGTGTCTTAGCTGGTTGT |
| 322-346               | hsa-miR-34a-5p | TGGCAGTGTCTTAGCTGGTTGT |
| 322-346               | hsa-miR-34a-5p | TGGCAGTGTCTTAGCTGGTTGT |
| 88-112                | hsa-miR-34a-5p | TGGCAGTGTCTTAGCTGGTTGT |
| 438-460               | hsa-miR-34a-5p | TGGCAGTGTCTTAGCTGGTTGT |
| 517-539               | hsa-miR-34a-5p | TGGCAGTGTCTTAGCTGGTTGT |
| 260-284               | hsa-miR-34a-5p | TGGCAGTGTCTTAGCTGGTTGT |
| 324-348               | hsa-miR-34a-5p | TGGCAGTGTCTTAGCTGGTTGT |
| 1337-1350             | hsa-miR-34a-5p | TGGCAGTGTCTTAGCTGGTTGT |
| 748-772               | hsa-miR-34a-5p | TGGCAGTGTCTTAGCTGGTTGT |
| 264-286               | hsa-miR-34a-5p | TGGCAGTGTCTTAGCTGGTTGT |
| 564-286               | hsa-miR-34a-5p | TGGCAGTGTCTTAGCTGGTTGT |
| 613-635               | hsa-miR-34a-5p | TGGCAGTGTCTTAGCTGGTTGT |
| 131-155               | hsa-miR-34a-5p | TGGCAGTGTCTTAGCTGGTTGT |
| 324-348               | hsa-miR-34a-5p | TGGCAGTGTCTTAGCTGGTTGT |
| 268-290               | hsa-miR-34a-5p | TGGCAGTGTCTTAGCTGGTTGT |
| 333-355               | hsa-miR-34a-5p | TGGCAGTGTCTTAGCTGGTTGT |
| 131-155               | hsa-miR-34a-5p | TGGCAGTGTCTTAGCTGGTTGT |
| 618-640               | hsa-miR-34a-5p | TGGCAGTGTCTTAGCTGGTTGT |
| 324-348               | hsa-miR-34a-5p | TGGCAGTGTCTTAGCTGGTTGT |
| 424-446               | hsa-miR-34a-5p | TGGCAGTGTCTTAGCTGGTTGT |
| 129-153               | hsa-miR-34a-5p | TGGCAGTGTCTTAGCTGGTTGT |
| 932-954               | hsa-miR-34a-5p | TGGCAGTGTCTTAGCTGGTTGT |
| 677-701               | hsa-miR-34a-5p | TGGCAGTGTCTTAGCTGGTTGT |
| 125-149               | hsa-miR-34a-5p | TGGCAGTGTCTTAGCTGGTTGT |
| 490-512               | hsa-miR-34a-5p | TGGCAGTGTCTTAGCTGGTTGT |
| 196-220               | hsa-miR-34a-5p | TGGCAGTGTCTTAGCTGGTTGT |
| 131-155               | hsa-miR-34a-5p | TGGCAGTGTCTTAGCTGGTTGT |
| 129-153               | hsa-miR-34a-5p | TGGCAGTGTCTTAGCTGGTTGT |
| 216-239               | hsa-miR-34a-5p | TGGCAGTGTCTTAGCTGGTTGT |
