# Supplementary material for: Dual biomarkers long non-coding RNA GAS5 and microRNA-34a co-expression signature in common solid tumors
Source: PubMed Central journal article supplement (PMC6173395; doi:10.1371/journal.pone.0198231), 2018-10-05
Supplement: pone.0198231.s005.pdf [file pone.0198231.s005.pdf]

**S5 Table. hsa-miR-34a pathways.**

| #  | KEGG pathway                            | KEGG ID  | #gene | p-value     |
|----|-----------------------------------------|----------|-------|-------------|
| 2  | Viral carcinogenesis                    | hsa05203 | 27    | 1.34E-12    |
| 1  | Cell cycle                              | hsa04110 | 22    | 1.00E-16    |
| 5  | Pathways in cancer                      | hsa05200 | 20    | 3.99E-07    |
| 4  | Transcriptional misregulation in cancer | hsa05202 | 19    | 3.32E-07    |
| 6  | Pyrimidine metabolism                   | hsa00240 | 12    | 8.19E-07    |
| 7  | Colorectal cancer                       | hsa05210 | 11    | 2.70E-06    |
| 8  | Small cell lung cancer                  | hsa05222 | 10    | 3.31E-06    |
| 11 | Chronic myeloid leukemia                | hsa05220 | 9     | 6.67E-05    |
| 12 | Pancreatic cancer                       | hsa05212 | 9     | 0.000107253 |
| 14 | Prostate cancer                         | hsa05215 | 9     | 0.000751872 |
| 3  | DNA replication                         | hsa03030 | 8     | 4.03E-08    |
| 15 | p53 signaling pathway                   | hsa04115 | 8     | 0.000786701 |
| 21 | Wnt signaling pathway                   | hsa04310 | 8     | 0.02368349  |
| 9  | Endometrial cancer                      | hsa05213 | 7     | 1.45E-05    |
| 10 | Bladder cancer                          | hsa05219 | 7     | 4.04E-05    |
| 13 | Non-small cell lung cancer              | hsa05223 | 7     | 0.000270115 |
| 18 | Glioma                                  | hsa05214 | 7     | 0.001558798 |
| 19 | Melanoma                                | hsa05218 | 6     | 0.007661737 |
| 16 | Thyroid cancer                          | hsa05216 | 5     | 0.001012695 |
| 20 | Notch signaling pathway                 | hsa04330 | 5     | 0.01841269  |
| 22 | Acute myeloid leukemia                  | hsa05221 | 5     | 0.02492931  |
